# Supplementary material
Source: PubMed Central journal article supplement (PMC6839930)
Supplement: rcmb.2018-0114OC_zhang_data_supplement.pdf [file rcmb.2018-0114OC_zhang_data_supplement.pdf]

## **Cystic Fibrosis Plasma Blunts the Immune Response to Bacterial Infection**

Xi Zhang, Amy Pan, Shuang Jia, Justin E. Ideozu, Katherine Woods, Kathleen Murkowski,  
Martin J. Hessner, Pippa M. Simpson, Hara Levy

**ONLINE DATA SUPPLEMENT**

## DETAILED METHODS

### Subject recruitment

A discovery cohort of 12 randomly selected CF probands was recruited (Fig. 1). Gene expression profiling and the following analyses were validated in validation cohort of 103 CF probands as previously profiled using the Human Genome U133 Plus 2.0 Array (GSE71799) (1). Cell composition analysis was performed on an additional cohort of 6 CF probands and 6 mothers, profiled using the transcriptome-level proofing tool Clariom D assay (ThermoFisher). Study subjects in all cohorts were diagnosed with cystic fibrosis (CF) based on pilocarpine iontophoresis (CF Foundation guidelines) (2), symptoms, pancreatic status, cystic fibrosis transmembrane conductance regulator (*CFTR*) mutation class, family history of CF, and information about the phenotypes of *CFTR* mutations (3-6). The detailed inclusion criteria included: 1) a confirmed CF diagnosis (sweat chloride value  $\geq 60$  mmol/L and/or *CFTR* genotype documenting 2 CF-causing mutations); 2) follow-up at least once per year; and 3) *CFTR* genotyping performed at the time of diagnosis or, in older subjects, after genetic testing became available. Patients diagnosed via newborn screening were evaluated by the Wisconsin Newborn Screening Laboratory for the recommended American College of Medical Genetics panel of 23 *CFTR* mutations (7). Additional genetic testing was carried out for patients with 1 identified mutation, including expanded mutation panel testing (Genzyme Genetics, Cambridge, MA), modified temporal temperature gradient electrophoresis of *CFTR* (Ambry Genetics, Aliso Viejo, CA), and multiplex ligation-dependent probe amplification for deletions and duplications (Ambry Genetics).

## Data collection and sampling

General demographics information (age, sex, and genotype) was collected by standardized questionnaire. Pancreatic insufficient (PI) status was defined as fecal pancreatic elastase <200 µg/g. Documented pancreatic function status was included indicating disease severity (5). *P. aeruginosa* infection data was collected in standard screening for microbiological flora, in which *P. aeruginosa* infection was reported as 1 positive microbiological growth from nasopharyngeal, sputum, and/or bronchoalveolar lavage specimens within 6 consecutive months of study enrollment. As the Children's Hospital of Wisconsin is an accredited CF Care Center, patients received standard CF care as outlined by the CF Consortium guidelines for recording of infection (8, 9). Forced expiratory volume in 1 second (FEV1) data was collected during clinical lung function measurements performed at baseline according to ATS-ERS Task Force guidelines (10). Sweat chloride value was collected by sweat tests performed closest to the date of serum sample collection. Healthy controls (HC) subjects were free of known infection at the time of sample collection. Plasma and/or serum from CF patients and age-matched, unrelated HCs were aseptically collected in acid citrate dextrose solution A or K<sup>+</sup> EDTA anti-coagulant for the peripheral blood mononuclear cell (PBMC)-based bioassay. The demographics information for the discovery cohort and validation cohort are shown in Table 1. An additional CF cohort included a group (n=6) of young CF probands (3 [50%] female, median age 7.5 [range 6-16] years, 1 [16.7%] *P. aeruginosa*-positive, median sweat chloride 102.7 [range 89.5-121.5] mEq/l, and median FEV1% 94.5 [range 74.0-96.0]) and their mothers (n=6, median age 43.5 [range 35-48] years). Two CF probands had 2 copies of the F508del mutation and the other four probands harbored at least one copy of the F508del mutation and one copy of another *CFTR* mutation (G542X, c.2184\_2185insA, W128X, and G551D).

### **PBMC stimulation and RNA processing**

Plasma was collected from each CF and HC subject in the discovery cohort. Healthy human PBMCs (UPN727, Cleveland, OH) were co-cultured with the plasma for 9 hours and then total RNA was isolated using Trizol (Invitrogen, Waltham, MA) (11) or the Direct-zol RNA kit (Zymo Research, Irvine, CA). In this approach, healthy human PBMCs are used as reporters that sensitively respond to soluble disease-associated factors present in the periphery; this approach was previously used to study type 1 diabetes (12-14), cancer (15), CF (1, 11, 16) and other disease (17). Autologous plasma was initially incubated with PBMCs, but we found that the gene expression response was minor compared to the plasma-induced cell response. Thus, we stopped use of autologous plasma as a baseline control in these studies.

### **Expression profiling**

For gene expression profiling in the discovery cohort, 24 total RNA samples (12 CF and 6 HC) were isolated using Trizol (Invitrogen, Waltham, MA) and submitted to analysis with the nCounter Gene Expression Assay – Human Immunology v2 Panel (NanoString Technologies, Seattle, WA). Gene expression data from the validation cohort was generated using the GeneChip Human Genome U133 Plus 2.0 (Affymetrix, Santa Clara, CA), as reported previously (1). The original microarray data are accessible from the NCBI Gene Expression Omnibus repository (GSE71799). For miRNA expression profiling, 18 total RNA samples (12 CF and 6 HC) isolated using the Direct-zol RNA kit (Zymo Research, Irvine, CA) were submitted to analysis with the nCounter Human v3 miRNA Assay. At least 100 ng total RNA was processed for each sample. Raw mRNA or miRNA counts for each assay were collected and processed

using the NanoString data analysis application nSolver 3.0. Normalization of the data was based on the geometric mean of housekeeping genes (gene expression analysis) or top-100 expressed miRNAs (miRNA analysis) that accounted for cell number variations. Gene expression profiling in other cohorts was performed following the manufacturer's instructions and as described in prior study (1).

### **Immune cell subset composition analysis**

Cell composition analysis in the discovery cohort was performed using the Immune Cell Type Profiling Module in nSolver 3.0 (NanoString), which quantifies cell subsets based on a set of pre-defined marker genes. A modified version of Pearson's correlation metric measurement (18) was employed to obtain the pairwise similarity (Advanced Analysis User Manual MAN-C0030, NanoString), with a low p value ( $p \leq 0.01$ ), indicating that the expression of each gene pair is highly correlated, with slopes near 1. Various immune cell subsets were quantified using cell type-specific marker genes. The underlying assumptions were that the marker genes are expressed only in their nominal cell type and are expressed at the same level in each cell subset. To examine these assumptions, pairwise relationships of each marker gene were visualized in scatter plots. Pairwise similarity was measured to test the null hypothesis that the given gene set exhibits no greater cell type-specific-like behavior than a randomly selected gene set of similar size. A slightly modified version of Pearson's correlation metric measurement was employed to obtain the pairwise similarity (Advanced Analysis User Manual MAN-C0030, NanoString). A low p-value ( $p \leq 0.01$ ) indicated the data are highly consistent with the assumptions of consistent expression within each cell subset. Cell subset compositions were measured by taking the average log<sub>2</sub> expression of its characteristic genes.

Cell composition analysis in the validation cohort and the additional CF cohort was performed using a novel signature matrix optimized for human PBMC deconvolution. First, more than 20 candidate marker genes for each cell subset were selected from a previously described matrix based on their expression patterns across the immune cell subsets (19). Next, the pairwise similarity statistic was computed between all pairs of the candidate marker genes within the microarray data from the validation cohort. Using the criteria (average Pearson correlation factor  $> 0.48$ ,  $p < 0.01$ ) and this similarity matrix, we identified a number of selected marker genes that share marker-like co-expression in each cell subset, and we defined these subsets as our final marker genes. Cell composition was evaluated following a recently reported method (18), which allows comparison of cell composition across various subject groups. The raw cell composition score was calculated as simple averages of the marker genes' log<sub>2</sub> expression. Additionally, a relative measurement was calculated to compare composition scores of each cell subset and the total T cells. The T cell normalized score measurement was reported to be cleaner, easier to interpret, and concordant with flow cytometry measurements (18).

### **CD14+CD16- monocytes isolation and analysis**

Human PBMCs were seeded ( $7.5 \times 10^5$  per well) and cultured with serum for 9 hours. The serum samples were collected from 6 HC and 24 CF subjects randomly selected from the validation cohort. The surviving PBMCs were counted (n of PBMCs) and CD14+CD16- monocytes were isolated using the EasySep Human Monocyte Isolation Kit (Stemcell) according to the manufacturer's instructions. Briefly, PBMCs were resuspended in PBS buffer containing 0.5% FBS and DNase I solution (100  $\mu\text{g}/\text{ml}$ ) for 15 min, and incubated with monocyte isolation cocktail containing monoclonal antibodies for 5 min, and then incubated with magnetic particles

for 5 min. The cell suspension was loaded into a new tube placed in the magnetic field of an EasySep Magnet (Stemcell) for 5 min. Non-monocytes, CD16+ monocytes, and platelets were eluted while CD14+ cells were retained. The tube was then removed from the magnetic field, followed by elution of the CD14+ fraction. The isolated monocytes were counted to obtain the n of monocytes, which was used to calculate monocyte frequency (monocyte % = n of monocytes/n of PBMCs × 100%). All cells were counted using a hemocytometer following staining with trypan blue.

### **Bioinformatics analysis**

Gene expression data of nCounter profiling (discovery cohort) was analyzed using nSolver 3.0. Gene expression data from microarray profiling (validation cohort) was analyzed using Expression Console and Transcriptome Analysis Console (Affymetrix). Raw microarray data files are accessible from the NCBI Gene Expression Omnibus repository (GEO# GSE71799). The complete differentially expressed gene lists from each cohort were linked by gene symbols to evaluate the correlation between 2 cohorts/platforms. Heatmaps and hierarchical clustering were plotted using nSolver 3.0. or Morpheus (Broad Institute, Cambridge, MA) (<https://software.broadinstitute.org/morpheus/>). All dendrograms were developed based on an average linkage and were clustered using 1 minus Pearson's correlation values as a distance metric. Raw count data of each mRNA or miRNA signature were normalized in each row and shown in a relative color scheme to indicate the minimum and maximum values and to highlight expression differences among different samples.

Biological functions, signaling pathways, and miRNA filter analyses were performed through Ingenuity Pathway Analysis/IPA (Hilden, Germany). All significantly differently expressed

genes validated in the 2 cohorts (n = 34) and miRNAs (n = 44) were submitted to IPA analysis, and only predicted targets with miRNA-target interactions classified as medium and high were retained. Furthermore, these miRNA-target interactions were validated through databases miRTarBase and miRNet (20, 21). Reporter gene assays were considered as direct evidence; all other validation methods (e.g., microarray and sequencing) were considered as indirect evidence.

### **Statistical analysis**

Demographic and clinical characteristics were summarized as median and range or n (%). Associations between categorical variables were examined by Chi-square test or Fisher's exact test. A non-parametric-Mann-Whitney-Wilcoxon test, Kruskal-Wallis test, and Wilcoxon matched-pairs test were used to compare continuous variables between groups. In addition, Pearson and Spearman correlation coefficients were calculated to examine the associations between continuous variables. Statistical analyses were performed and illustrated using SAS 9.4 (SAS, Cary, NC), SPSS 24 (SPSS, Chicago, IL), Prism 7 (GraphPad, La Jolla, CA), and Morpheus (Broad Institute, Cambridge, MA) (<https://software.broadinstitute.org/morpheus/>). A p value less than 0.05, without multiple testing adjustment, was considered statistically significant.

### **SUPPLEMENTARY REFERENCES**

1. Levy H, Jia S, Pan A, Zhang X, Kaldunski M, Nugent ML, Reske M, Feliciano R, Quintero D, Renda M, Woods KJ, Murkowski K, Johnson K, Verbsky J, Dasu T, Ideozu J, McColley S, Quasney MW, Dahmer M, Avner E, Farrell PM, Cannon C, Jacob H, Simpson PM, Hessner MJ.



- Identification of molecular signatures of cystic fibrosis disease status with plasma-based functional genomics. *Physiological Genomics* 2019.
2. LeGrys VA, Yankaskas JR, Quittell LM, Marshall BC, Mogayzel PJ, Jr., Cystic Fibrosis F. Diagnostic sweat testing: the Cystic Fibrosis Foundation guidelines. *The Journal of pediatrics* 2007; 151: 85-89.
  3. Bombieri C, Claustres M, De Boeck K, Derichs N, Dodge J, Girodon E, Sermet I, Schwarz M, Tzetis M, Wilschanski M, Bareil C, Bilton D, Castellani C, Cuppens H, Cutting GR, Drevinek P, Farrell P, Elborn JS, Jarvi K, Kerem B, Kerem E, Knowles M, Macek M, Jr., Munck A, Radojkovic D, Seia M, Sheppard DN, Southern KW, Stuhmann M, Tullis E, Zielenski J, Pignatti PF, Ferec C. Recommendations for the classification of diseases as CFTR-related disorders. *J Cyst Fibros* 2011; 10 Suppl 2: S86-102.
  4. Cystic Fibrosis F, Borowitz D, Parad RB, Sharp JK, Sabadosa KA, Robinson KA, Rock MJ, Farrell PM, Sontag MK, Rosenfeld M, Davis SD, Marshall BC, Accurso FJ. Cystic Fibrosis Foundation practice guidelines for the management of infants with cystic fibrosis transmembrane conductance regulator-related metabolic syndrome during the first two years of life and beyond. *The Journal of pediatrics* 2009; 155: S106-116.
  5. Castellani C, Cuppens H, Macek M, Jr., Cassiman JJ, Kerem E, Durie P, Tullis E, Assael BM, Bombieri C, Brown A, Casals T, Claustres M, Cutting GR, Dequeker E, Dodge J, Doull I, Farrell P, Ferec C, Girodon E, Johannesson M, Kerem B, Knowles M, Munck A, Pignatti PF, Radojkovic D, Rizzotti P, Schwarz M, Stuhmann M, Tzetis M, Zielenski J, Elborn JS. Consensus on the use and interpretation of cystic fibrosis mutation analysis in clinical practice. *J Cyst Fibros* 2008; 7: 179-196.
  6. Farrell PM, Rosenstein BJ, White TB, Accurso FJ, Castellani C, Cutting GR, Durie PR, Legrys VA, Massie J, Parad RB, Rock MJ, Campbell PW, 3rd, Cystic Fibrosis F. Guidelines for diagnosis of cystic fibrosis in newborns through older adults: Cystic Fibrosis Foundation consensus report. *The Journal of pediatrics* 2008; 153: S4-S14.

7. Watson MS, Cutting GR, Desnick RJ, Driscoll DA, Klinger K, Mennuti M, Palomaki GE, Popovich BW, Pratt VM, Rohlf s EM, Strom CM, Richards CS, Witt DR, Grody WW. Cystic fibrosis population carrier screening: 2004 revision of American College of Medical Genetics mutation panel. *Genet Med* 2004; 6: 387-391.
8. Mayer-Hamblett N, Kronmal RA, Gibson RL, Rosenfeld M, Retsch-Bogart G, Treggiari MM, Burns JL, Khan U, Ramsey BW, Investigators E. Initial *Pseudomonas aeruginosa* treatment failure is associated with exacerbations in cystic fibrosis. *Pediatr Pulmonol* 2012; 47: 125-134.
9. Proesmans M, Balinska-Miskiewicz W, Dupont L, Bossuyt X, Verhaegen J, Hoiby N, de Boeck K. Evaluating the "Leeds criteria" for *Pseudomonas aeruginosa* infection in a cystic fibrosis centre. *Eur Respir J* 2006; 27: 937-943.
10. Laszlo G. Standardisation of lung function testing: helpful guidance from the ATS/ERS Task Force. *Thorax* 2006; 61: 744-746.
11. Levy H, Wang X, Kaldunski M, Jia S, Kramer J, Pavletich SJ, Reske M, Gessel T, Yassai M, Quasney MW, Dahmer MK, Gorski J, Hessner MJ. Transcriptional signatures as a disease-specific and predictive inflammatory biomarker for type 1 diabetes. *Genes Immun* 2012; 13: 593-604.
12. Cabrera SM, Wang X, Chen YG, Jia S, Kaldunski ML, Greenbaum CJ, Type 1 Diabetes TrialNet Canakinumab Study G, Mandrup-Poulsen T, Group AS, Hessner MJ. Interleukin-1 antagonism moderates the inflammatory state associated with Type 1 diabetes during clinical trials conducted at disease onset. *Eur J Immunol* 2016; 46: 1030-1046.
13. Chen YG, Cabrera SM, Jia S, Kaldunski ML, Kramer J, Cheong S, Geoffrey R, Roethle MF, Woodliff JE, Greenbaum CJ, Wang X, Hessner MJ. Molecular signatures differentiate immune states in type 1 diabetic families. *Diabetes* 2014; 63: 3960-3973.
14. Wang X, Jia S, Geoffrey R, Alemzadeh R, Ghosh S, Hessner MJ. Identification of a molecular signature in human type 1 diabetes mellitus using serum and functional genomics. *J Immunol* 2008; 180: 1929-1937.

15. Palatnik A, Ye S, Kendziorowski C, Iden M, Zigman JS, Hessner MJ, Rader JS. Identification of a serum-induced transcriptional signature associated with metastatic cervical cancer. *PLoS One* 2017; 12: e0181242.
16. Ideozu JE, Zhang X, Pan A, Ashrafi Z, Woods KJ, Hessner MJ, Simpson P, Levy H. Increased Expression of Plasma-Induced ABCC1 mRNA in Cystic Fibrosis. *Int J Mol Sci* 2017; 18.
17. Gurram B, Salzman NH, Kaldunski ML, Jia S, Li BU, Stephens M, Sood MR, Hessner MJ. Plasma-induced signatures reveal an extracellular milieu possessing an immunoregulatory bias in treatment-naïve paediatric inflammatory bowel disease. *Clin Exp Immunol* 2016; 184: 36-49.
18. Danaher P, Warren S, Dennis L, D'Amico L, White A, Disis ML, Geller MA, Odunsi K, Beechem J, Fling SP. Gene expression markers of Tumor Infiltrating Leukocytes. *J Immunother Cancer* 2017; 5: 18.
19. Newman AM, Liu CL, Green MR, Gentles AJ, Feng W, Xu Y, Hoang CD, Diehn M, Alizadeh AA. Robust enumeration of cell subsets from tissue expression profiles. *Nat Methods* 2015; 12: 453-457.
20. Fan Y, Siklenka K, Arora SK, Ribeiro P, Kimmins S, Xia J. miRNet - dissecting miRNA-target interactions and functional associations through network-based visual analysis. *Nucleic Acids Res* 2016; 44: W135-141.
21. Chou CH, Shrestha S, Yang CD, Chang NW, Lin YL, Liao KW, Huang WC, Sun TH, Tu SJ, Lee WH, Chiew MY, Tai CS, Wei TY, Tsai TR, Huang HT, Wang CY, Wu HY, Ho SY, Chen PR, Chuang CH, Hsieh PJ, Wu YS, Chen WL, Li MJ, Wu YC, Huang XY, Ng FL, Buddhakosai W, Huang PC, Lan KC, Huang CY, Weng SL, Cheng YN, Liang C, Hsu WL, Huang HD. miRTarBase update 2018: a resource for experimentally validated microRNA-target interactions. *Nucleic Acids Res* 2018; 46: D296-D302.

## SUPPLEMENTARY FIGURES

**Figure E1.** Heatmap showing hierarchical clustering of PBMC samples based on alterations of all immune-related genes measured with the nCounter immunology panel. Orange indicates high expression; blue indicates low expression.

**Figure E2.** Scatter plots matrix of pairwise marker genes in 6 cell subsets. Gene expression across all 12 subjects in the discovery cohort is shown. \*Mostly CD8 T cells. #Cell subsets with limited marker genes.

**Figure E3.** Pairwise similarity (upper right) of 15 candidate marker genes and scatter plots matrix (lower left) of 5 selected marker genes in monocytes. Gene expression across all 143 subjects in the validation cohort is shown.

**Figure E4.** T cell-normalized cell composition scores of all cell subsets. T: T cells; B: B cells; NK: natural killer cells; M $\phi$ : macrophages. Cell subset score was evaluated across all 143 subjects in the validation cohort.

## **SUPPLEMENTARY TABLES**

**Table E1.** Differentially expressed genes identified by nCounter.

**Table E2.** Differentially expressed gene sets identified by nCounter.

**Table E3.** Pathway signatures identified by nCounter.

**Table E4.** Shared gene signatures identified by nCounter and microarray.

**Table E5.** Significant biological functions identified by IPA.

**Table E6.** Significant canonical pathways identified by IPA.

**Table E7.** Marker gene matrix used in immune cell subset composition analysis.

**Table E8.** Details of immune cell subsets analyzed in the validation cohort.

**Table E9.** Differentially expressed miRNAs identified by nCounter.

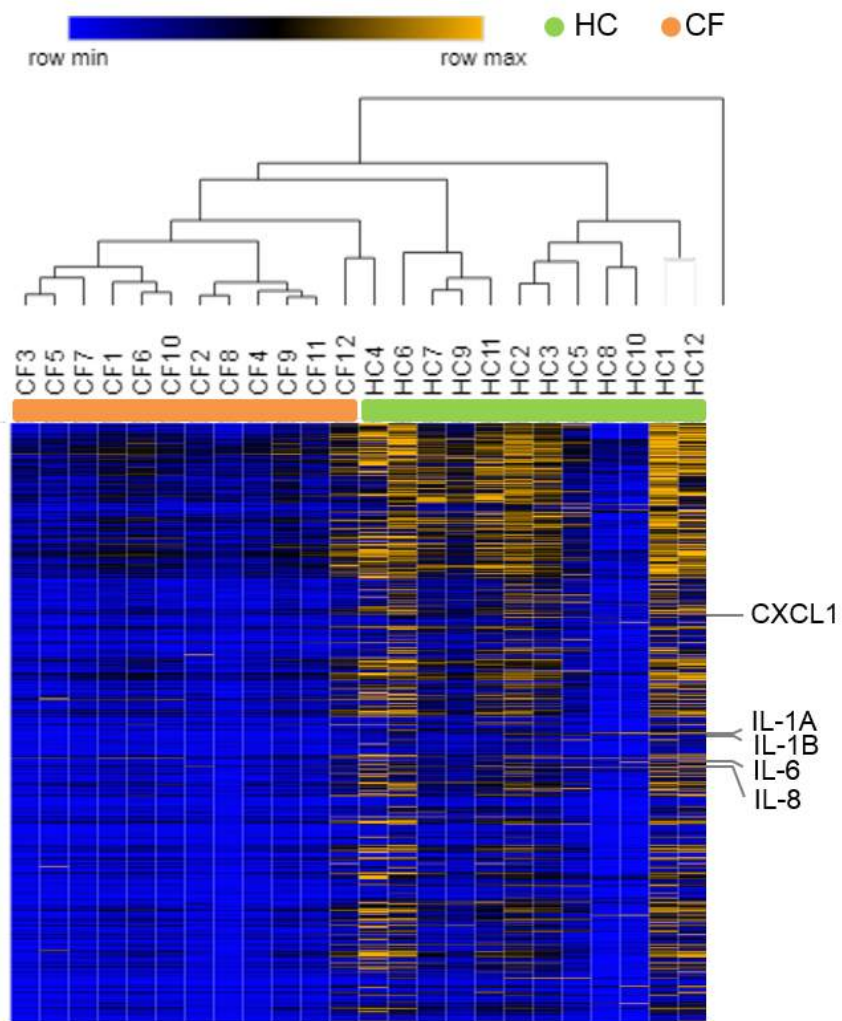

Fig. E1

127x143mm (150 x 150 DPI)

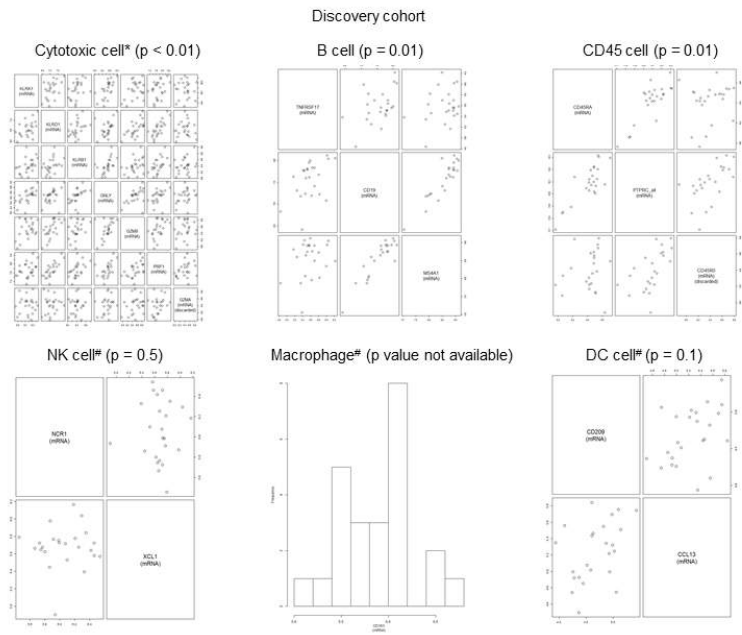

Fig. E2

254x190mm (96 x 96 DPI)

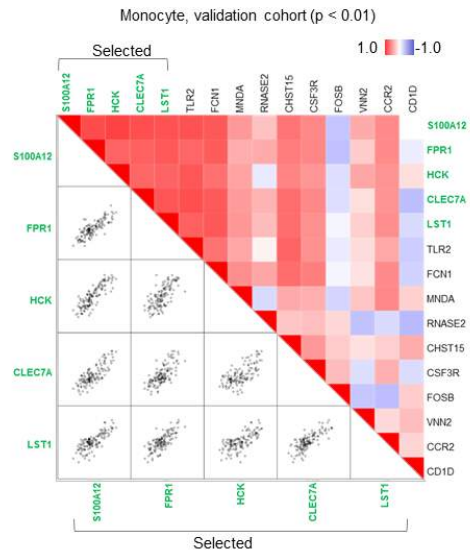

Fig. E3

254x190mm (96 x 96 DPI)



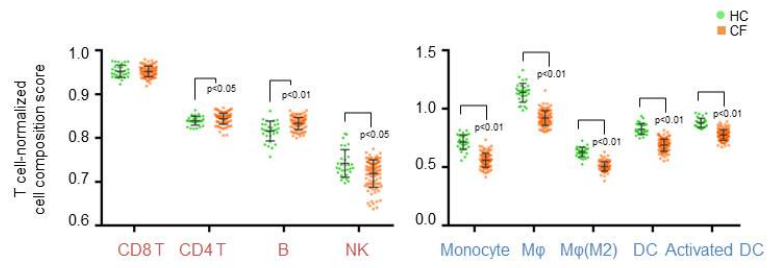

Fig. E4

254x190mm (96 x 96 DPI)

Table E1

| mRNA name      | probe.ID             | Log2 fold change | std error | Lower confidence limit | Upper confidence limit | P-value  | BH. adj. p-value | Gene.sets                                                                                                                |
|----------------|----------------------|------------------|-----------|------------------------|------------------------|----------|------------------|--------------------------------------------------------------------------------------------------------------------------|
| CXCL1          | NM_0015<br>11.1:742  | -2.71            | 0.429     | -3.55                  | -1.87                  | 2.35E-06 | 6.10E-05         | Behavior, Cell Surface Receptor Linked Signal Transduction                                                               |
| CXCL2          | NM_0020<br>89.3:854  | -2.65            | 0.445     | -3.52                  | -1.77                  | 5.52E-06 | 8.98E-05         | Go 0007166, Defense Response, Extracellular Region, Behavior, Cell Fraction, Chemokine Activity, Defense                 |
| IL6            | NM_0006<br>00.1:220  | -2.46            | 0.628     | -3.69                  | -1.23                  | 0.000735 | 0.0042           | Response, Extracellular Region, Extracellular Region Part, Cell Development, Extracellular Region, Extracellular Region  |
| IL1B           | NM_0005<br>76.2:840  | -2.25            | 0.282     | -2.8                   | -1.69                  | 6.31E-08 | 3.76E-06         | Part, Extracellular Space, Negative Regulation Of Apoptosis, Apoptosis Go, Cell Cell Signaling, Cell Development, Cell   |
| IL8<br>(CXCL8) | NM_0005<br>84.2:25   | -2.16            | 0.266     | -2.68                  | -1.64                  | 4.61E-08 | 3.09E-06         | Proliferation Go 0008283, Extracellular Region, Extracellular Cell Activation, Cell Surface Receptor Linked Signal       |
| IL1A           | NM_0005<br>75.3:1085 | -2.09            | 0.31      | -2.69                  | -1.48                  | 9.00E-07 | 3.08E-05         | Transduction Go 0007166, Extracellular Region, Cell Development, Defense Response, Extracellular Region,                 |
| CCL7           | NM_0062<br>73.2:120  | -1.89            | 0.703     | -3.27                  | -0.512                 | 0.0134   | 0.0455           | Extracellular Region Part, Extracellular Space, Inflammatory Behavior, Cell Cell Signaling, Cellular Cation Homeostasis, |
| PLAUR(MO3)     | NM_0010<br>05376.1:4 | -1.86            | 0.227     | -2.31                  | -1.42                  | 3.89E-08 | 2.99E-06         | Cellular Homeostasis, Chemical Homeostasis, Extracellular Behavior, Cell Surface, Locomotory Behavior, Membrane,         |
| PTGS2(C        | NM_0009<br>NM_0029   | -1.78            | 0.352     | -2.47                  | -1.09                  | 4.61E-05 | 0.00042          | Membrane Part, Plasma Membrane, Response To Chemical Cytoplasm, Nucleus, Regulation Of Biological Quality                |
| CCL3(MI        | NM_0029<br>83.2:159  | -1.73            | 0.355     | -2.43                  | -1.04                  | 7.07E-05 | 0.000602         | Cell Fraction, Cell Surface Receptor Linked Signal Transduction Go 0007166, Establishment Of Localization,               |
| P-1A)          | NM_0045<br>91.1:35   | -1.72            | 0.298     | -2.3                   | -1.14                  | 8.29E-06 | 0.000124         | Behavior, Cell Cell Signaling, Defense Response, Extracellular Region, Extracellular Region Part, Extracellular          |
| CCL20          | NM_0032<br>64.3:180  | -1.72            | 0.305     | -2.32                  | -1.12                  | 1.14E-05 | 0.000157         | Cell Development, Cell Surface, Integral To Membrane, Integral To Plasma Membrane, Intrinsic To Membrane,                |
| TLR2           | NM_0027<br>NM_0008   | -1.6             | 0.139     | -1.87                  | -1.33                  | 9.18E-11 | 4.93E-08         | Establishment Of Localization, Transport Anatomical Structure Morphogenesis, Integral To                                 |
| PPBP(CX        | NM_0008<br>87.3:700  | -1.51            | 0.17      | -1.84                  | -1.17                  | 1.06E-08 | 1.24E-06         | Membrane, Integral To Plasma Membrane, Intrinsic To Cell Development, Cell Fraction, Establishment Of Protein            |
| ITGAX(C        | NM_0005<br>94.2:1010 | -1.44            | 0.368     | -2.16                  | -0.72                  | 0.000742 | 0.0042           | Localization, Multi Organism Process, Negative Regulation                                                                |
| D11c)          |                      |                  |           |                        |                        |          |                  |                                                                                                                          |
| TNF            |                      |                  |           |                        |                        |          |                  |                                                                                                                          |

|                 |                                 |        |       |        |        |          |          |                                                                                                                                                       |
|-----------------|---------------------------------|--------|-------|--------|--------|----------|----------|-------------------------------------------------------------------------------------------------------------------------------------------------------|
| ICAM1<br>(CD54) | NM_0002<br>01.2:2253<br>NM_0010 | -1.32  | 0.134 | -1.58  | -1.06  | 1.70E-09 | 4.58E-07 | Integral To Membrane, Integral To Plasma Membrane, Intrinsic To Membrane, Intrinsic To Plasma Membrane, Cell Development, Cytoplasm, Establishment Of |
| NLRP3           | 79821.2:4                       | -1.31  | 0.2   | -1.71  | -0.923 | 1.27E-06 | 3.89E-05 | Localization, Establishment Of Protein Localization,                                                                                                  |
| S100A9          | NM_0029                         | -1.22  | 0.29  | -1.79  | -0.654 | 0.000359 | 0.00227  | Cell Cell Signaling, Defense Response, Inflammatory                                                                                                   |
| CSF3R           | NM_1560<br>NM_0008              | -1.19  | 0.215 | -1.61  | -0.768 | 1.49E-05 | 0.000188 | Defense Response, Integral To Membrane, Integral To Integral To Membrane, Integral To Plasma Membrane,                                                |
| IL1R1           | 77.2:4295                       | -1.18  | 0.255 | -1.68  | -0.677 | 0.000135 | 0.000994 | Interleukin Binding, Intrinsic To Membrane, Intrinsic To                                                                                              |
| FCER1G          | NM_0041<br>NM_0015              | -1.16  | 0.213 | -1.58  | -0.745 | 1.75E-05 | 0.000195 | Integral To Membrane, Integral To Plasma Membrane, Biopolymer Metabolic Process, Biopolymer Modification,                                             |
| IRAK2           | 70.3:1285                       | -1.14  | 0.139 | -1.41  | -0.869 | 3.64E-08 | 2.99E-06 | Cell Surface, Cellular Protein Metabolic Process, Defense                                                                                             |
| TNFSF1          | NM_0012                         |        |       |        |        |          |          | Cell Development, Integral To Membrane, Integral To                                                                                                   |
| 5               | 04344.1:2                       | -1.14  | 0.318 | -1.76  | -0.517 | 0.00166  | 0.0084   | Plasma Membrane, Intrinsic To Membrane, Intrinsic To                                                                                                  |
| IL1RN           | NM_0005<br>NM_0054              | -1.05  | 0.288 | -1.61  | -0.484 | 0.00145  | 0.00754  | Cytokine Activity, Extracellular Region, Extracellular Region Cell Surface Receptor Linked Signal Transduction Go                                     |
| SRC             | 17.3:1410                       | -1.01  | 0.168 | -1.34  | -0.685 | 4.52E-06 | 8.10E-05 | 0007166, Cellular Component Assembly, Cellular Protein                                                                                                |
| CD9             | NM_0017                         | -1     | 0.298 | -1.59  | -0.421 | 0.00272  | 0.013    | Anatomical Structure Morphogenesis, Macromolecular                                                                                                    |
| FCGR2A          | NM_0216                         | -0.945 | 0.107 | -1.15  | -0.734 | 1.16E-08 | 1.24E-06 |                                                                                                                                                       |
| NT5E            | NM_0025<br>NM_0038              | -0.908 | 0.237 | -1.37  | -0.444 | 0.000907 | 0.00502  | Biopolymer Metabolic Process, Cell Fraction, Dna Metabolic Apoptosis Go, Cell Development, Positive Regulation Of                                     |
| CRADD           | 05.3:675<br>NM_0009             | -0.865 | 0.149 | -1.16  | -0.573 | 7.47E-06 | 0.000115 | Biological Process, Positive Regulation Of Cellular Process, Behavior, Cell Surface Receptor Linked Signal Transduction                               |
| PTAFR           | 52.3:1035                       | -0.864 | 0.322 | -1.49  | -0.234 | 0.0135   | 0.0455   | Go 0007166, Defense Response, Inflammatory Response,                                                                                                  |
| HAVCR2          | NM_0327<br>NM_0011              | -0.835 | 0.138 | -1.11  | -0.564 | 4.45E-06 | 8.10E-05 | Carbohydrate Binding, Cytoplasm, Membrane, Nucleus,                                                                                                   |
| LGALS3          | 77388.1:4                       | -0.821 | 0.149 | -1.11  | -0.528 | 1.61E-05 | 0.000191 | Plasma Membrane                                                                                                                                       |
| SLAMF7          | NM_0211                         | -0.807 | 0.143 | -1.09  | -0.527 | 1.12E-05 | 0.000157 |                                                                                                                                                       |
| CDKN1A          | NM_0003<br>NM_0029              | -0.778 | 0.125 | -1.02  | -0.534 | 2.72E-06 | 6.30E-05 | Cell Development, Negative Regulation Of Cellular Anatomical Structure Morphogenesis, Cell Cell Signaling,                                            |
| CCL4            | 84.2:35<br>NM_0051              | -0.77  | 0.252 | -1.26  | -0.276 | 0.00583  | 0.0237   | Defense Response, Extracellular Region, Extracellular Region Biopolymer Metabolic Process, Defense Response, Immune                                   |
| CEBPB           | 94.2:1420<br>NM_1979            | -0.767 | 0.182 | -1.12  | -0.411 | 0.000354 | 0.00226  | Response, Immune System Process, Inflammatory Cell Activation, Establishment Of Localization, Integral To                                             |
| CLEC7A          | 54.2:55                         | -0.748 | 0.111 | -0.965 | -0.532 | 8.38E-07 | 3.08E-05 | Membrane, Intrinsic To Membrane, Leukocyte Activation,                                                                                                |

|         |           |        |        |        |        |          |          |                                                                                                                       |
|---------|-----------|--------|--------|--------|--------|----------|----------|-----------------------------------------------------------------------------------------------------------------------|
|         | NM_0012   |        |        |        |        |          |          | Cellular Protein Metabolic Process, I Kappab Kinase Nf                                                                |
| CASP1   | 23.3:971  | -0.733 | 0.151  | -1.03  | -0.436 | 7.79E-05 | 0.000634 | Kappab Cascade, Positive Regulation Of Biological Process, Behavior, Cell Surface Receptor Linked Signal Transduction |
|         | NM_0039   |        |        |        |        |          |          |                                                                                                                       |
| CCRL2   | 65.4:1110 | -0.728 | 0.129  | -0.982 | -0.475 | 1.17E-05 | 0.000157 | Go 0007166, Integral To Membrane, Integral To Plasma                                                                  |
| GP1BB   | NM_0004   | -0.718 | 0.107  | -0.927 | -0.509 | 9.18E-07 | 3.08E-05 |                                                                                                                       |
| ADA     | NM_0000   | -0.704 | 0.0954 | -0.891 | -0.517 | 2.20E-07 | 1.06E-05 |                                                                                                                       |
|         | NM_0039   |        |        |        |        |          |          | Biopolymer Metabolic Process, Cell Development,                                                                       |
| NFKB1   | 98.2:1675 | -0.682 | 0.11   | -0.897 | -0.466 | 3.05E-06 | 6.30E-05 | Cytoplasm, Defense Response, Negative Regulation Of                                                                   |
| NFKBIA  | NM_0205   | -0.675 | 0.142  | -0.954 | -0.397 | 9.63E-05 | 0.000738 | Apoptosis Go, Cell Development, Cytoplasm, Identical                                                                  |
|         | NM_0062   |        |        |        |        |          |          | Biopolymer Metabolic Process, Biopolymer Modification,                                                                |
| PRKCD   | 54.3:2165 | -0.631 | 0.0865 | -0.8   | -0.461 | 2.67E-07 | 1.10E-05 | Cellular Macromolecule Metabolic Process, Cellular Protein                                                            |
| FCGR2A  | NM_2015   | -0.628 | 0.148  | -0.918 | -0.337 | 0.000344 | 0.00225  |                                                                                                                       |
|         | NM_0011   |        |        |        |        |          |          | Biopolymer Metabolic Process, Negative Regulation Of                                                                  |
| PRDM1   | 98.3:798  | -0.619 | 0.11   | -0.833 | -0.404 | 1.12E-05 | 0.000157 | Cellular Metabolic Process, Negative Regulation Of                                                                    |
|         | NM_1385   |        |        |        |        |          |          | Biosynthetic Process, Cell Activation, Cytoplasm,                                                                     |
| TLR4    | 54.2:2570 | -0.606 | 0.153  | -0.906 | -0.307 | 0.000649 | 0.00385  | Cytoplasmic Part, Integral To Membrane, Integral To Plasma                                                            |
|         | NM_0010   |        |        |        |        |          |          |                                                                                                                       |
| NFKBIZ  | 05474.1:2 | -0.585 | 0.135  | -0.851 | -0.32  | 0.000274 | 0.00184  |                                                                                                                       |
| EGR2    | NM_0003   | -0.583 | 0.181  | -0.938 | -0.229 | 0.00389  | 0.017    | Anatomical Structure Development, Dna Binding,                                                                        |
|         | NM_0023   |        |        |        |        |          |          | I Kappab Kinase Nf Kappab Cascade, Intracellular Signaling                                                            |
| LTBR    | 42.1:1435 | -0.582 | 0.176  | -0.926 | -0.238 | 0.00315  | 0.0146   | Cascade, Positive Regulation Of Biological Process, Positive                                                          |
|         | NM_0571   |        |        |        |        |          |          | Biopolymer Metabolic Process, Biopolymer Modification,                                                                |
| DUSP4   | 58.2:3115 | -0.57  | 0.11   | -0.786 | -0.355 | 3.34E-05 | 0.000315 | Cellular Macromolecule Metabolic Process, Cellular Protein                                                            |
| TRAF4   | NM_0042   | -0.563 | 0.129  | -0.817 | -0.31  | 0.000252 | 0.00171  | Dna Binding, Nucleus, Signal Transduction                                                                             |
| TNFAIP6 | NM_0071   | -0.563 | 0.195  | -0.946 | -0.18  | 0.00868  | 0.0326   | Carbohydrate Binding, Cell Cell Signaling, Defense Response,                                                          |
| ITGA2B  | NM_0004   | -0.557 | 0.103  | -0.759 | -0.355 | 2.02E-05 | 0.000213 | Identical Protein Binding                                                                                             |
| TNFRSF  | NM_0010   | -0.556 | 0.0929 | -0.739 | -0.374 | 5.02E-06 | 8.48E-05 | Receptor Activity, Transmembrane Receptor Activity                                                                    |
|         | NM_0016   |        |        |        |        |          |          | Biopolymer Metabolic Process, Cell Development,                                                                       |
| AHR     | 21.3:1900 | -0.533 | 0.12   | -0.768 | -0.298 | 0.000204 | 0.00144  | Nucleobasenucleosidenucleotide And Nucleic Acid                                                                       |
| CD48    | NM_0017   | 0.508  | 0.0669 | 0.377  | 0.64   | 1.38E-07 | 7.40E-06 | Defense Response, Integral To Membrane, Integral To                                                                   |
|         | NM_0046   |        |        |        |        |          |          | I Kappab Kinase Nf Kappab Cascade, Intracellular Signaling                                                            |
| TRAF5   | 19.3:400  | 0.527  | 0.0899 | 0.351  | 0.703  | 6.72E-06 | 0.000106 | Cascade, Positive Regulation Of Biological Process, Positive                                                          |
|         | NM_0024   |        |        |        |        |          |          | Apoptosis Go, Cell Development, Cytoplasm, Defense                                                                    |
| MX1     | 62.2:1485 | 0.534  | 0.183  | 0.175  | 0.894  | 0.00805  | 0.0311   | Response, Positive Regulation Of Biological Process, Positive                                                         |

|        | NM_0036  |       |        |       |       |          |          | Cell Proliferation Go 0008283, Cell Surface Receptor Linked |
|--------|----------|-------|--------|-------|-------|----------|----------|-------------------------------------------------------------|
| IFITM1 | 41.3:482 | 0.567 | 0.0863 | 0.398 | 0.736 | 1.30E-06 | 3.89E-05 | Signal Transduction Go 0007166, Membrane, Negative          |
| ATM    | NM_0000  | 0.572 | 0.0917 | 0.392 | 0.752 | 2.82E-06 | 6.30E-05 | Biopolymer Metabolic Process, Dna Metabolic Process,        |
| MS4A1  | NM_1528  | 0.609 | 0.168  | 0.28  | 0.938 | 0.00149  | 0.00764  | Immune Response, Immune System Process, Integral To         |

Table E2

| <b>Gene Sets</b>                                         | <b>Undirected Type:<br/>differential expression<br/>in CF vs. baseline of HC</b> | <b>Directed Type:<br/>differential expression in<br/>CF vs. baseline of HC</b> |
|----------------------------------------------------------|----------------------------------------------------------------------------------|--------------------------------------------------------------------------------|
| Protein Amino Acid Phosphorylation                       | 5.784                                                                            | -5.064                                                                         |
| Phosphorylation                                          | 5.224                                                                            | -4.414                                                                         |
| Negative Regulation Of Biological Process                | 4.651                                                                            | -1.865                                                                         |
| Viral Genome Replication                                 | 4.633                                                                            | -4.633                                                                         |
| Transport                                                | 4.619                                                                            | -4.497                                                                         |
| Biopolymer Modification                                  | 4.58                                                                             | -4.009                                                                         |
| Protein Oligomerization                                  | 4.508                                                                            | -4.484                                                                         |
| Post Translational Protein Modification                  | 4.476                                                                            | -3.983                                                                         |
| Protein Kinase Cascade                                   | 4.442                                                                            | -3.807                                                                         |
| Protein Modification Process                             | 4.301                                                                            | -3.79                                                                          |
| Negative Regulation Of Cellular Process                  | 4.202                                                                            | -2.17                                                                          |
| Cytoskeleton                                             | 4.189                                                                            | 2.687                                                                          |
| Cell Surface                                             | 4.054                                                                            | -3.208                                                                         |
| Organelle Organization And Biogenesis                    | 4.051                                                                            | -3.053                                                                         |
| Reproductive Process                                     | 4.028                                                                            | -4.028                                                                         |
| Positive Regulation Of I Kappab Kinase Nf Kappab Cascade | 4.008                                                                            | -2.411                                                                         |
| Cellular Protein Metabolic Process                       | 3.979                                                                            | -3.518                                                                         |
| Leukocyte Activation                                     | 3.971                                                                            | -1.519                                                                         |
| Establishment Of Localization                            | 3.863                                                                            | -3.709                                                                         |
| Protein Metabolic Process                                | 3.862                                                                            | -3.545                                                                         |
| Lipid Raft                                               | 3.848                                                                            | 3.758                                                                          |
| Nuclear Import                                           | 3.835                                                                            | -3.835                                                                         |
| I Kappab Kinase Nf Kappab Cascade                        | 3.792                                                                            | -2.64                                                                          |
| Cellular Macromolecule Metabolic Process                 | 3.753                                                                            | -3.212                                                                         |
| Lymphocyte Differentiation                               | 3.752                                                                            | 3.752                                                                          |
| Extracellular Region Part                                | 3.716                                                                            | -2.79                                                                          |
| Extracellular Space                                      | 3.716                                                                            | -2.79                                                                          |

|                                                  |       |        |
|--------------------------------------------------|-------|--------|
| Positive Regulation Of Cellular Process          | 3.712 | -1.714 |
| Regulation Of Programmed Cell Death              | 3.708 | -0.892 |
| Regulation Of Transferase Activity               | 3.677 | 1.403  |
| Cellular Component Assembly                      | 3.596 | -3.251 |
| Regulation Of Cell Proliferation                 | 3.562 | 3.145  |
| Positive Regulation Of Signal Transduction       | 3.555 | -1.715 |
| Apoptosis Go                                     | 3.553 | -2.427 |
| Regulation Of Apoptosis                          | 3.549 | -1.22  |
| Regulation Of Dna Binding                        | 3.53  | -2.404 |
| Regulation Of Signal Transduction                | 3.529 | -0.6   |
| Identical Protein Binding                        | 3.504 | -3.005 |
| Cell Activation                                  | 3.493 | -0.514 |
| Macromolecular Complex Assembly                  | 3.488 | -2.791 |
| Nucleus                                          | 3.487 | -3.166 |
| Receptor Complex                                 | 3.451 | -2.742 |
| Nervous System Development                       | 3.44  | -3.423 |
| Positive Regulation Of Biological Process        | 3.44  | -1.89  |
| Enzyme Linked Receptor Protein Signaling Pathway | 3.412 | -1.667 |
| Immune System Development                        | 3.405 | 3.102  |
| Anatomical Structure Morphogenesis               | 3.402 | -3.255 |
| Extracellular Region                             | 3.398 | -2.431 |
| Humoral Immune Response                          | 3.382 | 2.446  |
| Cell Proliferation Go 0008283                    | 3.37  | -1.778 |
| Response To External Stimulus                    | 3.369 | -3.128 |
| Positive Regulation Of Catalytic Activity        | 3.365 | 1.302  |
| Regulation Of Kinase Activity                    | 3.344 | -1.645 |
| Regulation Of Protein Kinase Activity            | 3.344 | -1.645 |
| Positive Regulation Of Developmental Process     | 3.294 | -0.552 |
| Regulation Of Developmental Process              | 3.263 | -1.54  |
| Response To Stress                               | 3.259 | -2.834 |

|                                                                   |       |        |
|-------------------------------------------------------------------|-------|--------|
| Negative Regulation Of Cellular Metabolic Process                 | 3.257 | -2.721 |
| Dna Metabolic Process                                             | 3.217 | 0.864  |
| System Development                                                | 3.192 | -1.786 |
| Carbohydrate Binding                                              | 3.19  | -3.19  |
| Negative Regulation Of Apoptosis                                  | 3.18  | -1.814 |
| Receptor Signaling Protein Activity                               | 3.175 | 2.01   |
| Programmed Cell Death                                             | 3.164 | -2.045 |
| Transmembrane Receptor Activity                                   | 3.158 | -2.87  |
| Positive Regulation Of Response To Stimulus                       | 3.147 | -2.78  |
| Hemopoiesis                                                       | 3.143 | 2.781  |
| Cell Development                                                  | 3.127 | -2.304 |
| Intracellular Non Membrane Bound Organelle                        | 3.12  | 2.103  |
| Non Membrane Bound Organelle                                      | 3.12  | 2.103  |
| Inflammatory Response                                             | 3.119 | -2.739 |
| Regulation Of Secretion                                           | 3.114 | -3.012 |
| Membrane Organization And Biogenesis                              | 3.109 | -3.044 |
| Response To Wounding                                              | 3.072 | -2.893 |
| Intracellular Signaling Cascade                                   | 3.049 | -1.606 |
| Establishment Of Protein Localization                             | 3.046 | -2.744 |
| Biopolymer Metabolic Process                                      | 3.045 | -2.284 |
| Nucleobasenucleosidenucleotide And Nucleic Acid Metabolic Process | 2.92  | -1.621 |
| Cytoplasm                                                         | 2.918 | -1.947 |
| Transcription From Rna Polymerase Ii Promoter                     | 2.909 | -2.782 |
| Positive Regulation Of Cell Differentiation                       | 2.891 | 2.458  |
| Response To Chemical Stimulus                                     | 2.86  | -2.469 |
| Membrane                                                          | 2.842 | -1.53  |
| Defense Response                                                  | 2.84  | -2.079 |
| Rna Metabolic Process                                             | 2.84  | -2.328 |



|                                                                                          |       |        |
|------------------------------------------------------------------------------------------|-------|--------|
| Multicellular Organismal Development                                                     | 2.838 | -1.311 |
| Signal Transduction                                                                      | 2.83  | -1.813 |
| Soluble Fraction                                                                         | 2.828 | -2.103 |
| Plasma Membrane                                                                          | 2.819 | -1.542 |
| Receptor Activity                                                                        | 2.813 | -2.335 |
| Lysosome                                                                                 | 2.797 | -2.442 |
| Lytic Vacuole                                                                            | 2.797 | -2.442 |
| Transcription Dna Dependent                                                              | 2.795 | -2.158 |
| Immune System Process                                                                    | 2.79  | 0.51   |
| Membrane Part                                                                            | 2.763 | -1.606 |
| Plasma Membrane Part                                                                     | 2.754 | -1.448 |
| Cell Cell Signaling                                                                      | 2.747 | -1.957 |
| Regulation Of Biological Quality                                                         | 2.747 | -1.832 |
| Positive Regulation Of Immune System Process                                             | 2.735 | 1.304  |
| Macromolecular Complex                                                                   | 2.721 | -2.159 |
| Protein Complex                                                                          | 2.721 | -2.159 |
| Hemostasis                                                                               | 2.718 | -1.665 |
| Mitochondrion                                                                            | 2.709 | 1.068  |
| Integral To Plasma Membrane                                                              | 2.704 | -1.634 |
| Intrinsic To Plasma Membrane                                                             | 2.688 | -1.61  |
| Interleukin Binding                                                                      | 2.673 | -2.602 |
| Cytoplasmic Part                                                                         | 2.671 | -0.761 |
| Integral To Membrane                                                                     | 2.669 | -1.638 |
| Response To Other Organism                                                               | 2.669 | -2.263 |
| Immune Response                                                                          | 2.662 | 0.412  |
| Intrinsic To Membrane                                                                    | 2.656 | -1.617 |
| Negative Regulation Of Nucleobasenucleosidenucleotide And Nucleic Acid Metabolic Process | 2.655 | -2.519 |
| Immunological Synapse                                                                    | 2.647 | -0.628 |
| Behavior                                                                                 | 2.625 | -2.266 |
| T Cell Proliferation                                                                     | 2.618 | 2.003  |
| Positive Regulation Of Cell Proliferation                                                | 2.616 | -1.08  |

|                                                             |       |        |
|-------------------------------------------------------------|-------|--------|
| Cell Surface Receptor Linked Signal Transduction Go 0007166 | 2.612 | -1.831 |
| Rna Biosynthetic Process                                    | 2.602 | -1.596 |
| Regulation Of Molecular Function                            | 2.586 | 1.151  |
| Chemokine Activity                                          | 2.563 | -2.563 |
| G Protein Coupled Receptor Binding                          | 2.563 | -2.563 |
| Vacuole                                                     | 2.555 | -2.227 |
| Dna Binding                                                 | 2.551 | -1.613 |
| Receptor Binding                                            | 2.541 | 1.063  |
| Transcription                                               | 2.539 | -2.214 |
| Locomotory Behavior                                         | 2.523 | -2.114 |
| External Side Of Plasma Membrane                            | 2.505 | 2.267  |
| Regulation Of Transcription From Rna Polymerase Ii Promoter | 2.486 | 2.378  |
| Anatomical Structure Development                            | 2.474 | 1.946  |
| Endoplasmic Reticulum                                       | 2.472 | 0.48   |
| Cell Fraction                                               | 2.46  | -1.569 |
| Organelle Part                                              | 2.434 | 1.279  |
| Intracellular Organelle Part                                | 2.424 | 1.435  |
| Organelle Membrane                                          | 2.357 | -0.992 |
| Cell Cell Adhesion                                          | 2.248 | -2.079 |
| Response To Biotic Stimulus                                 | 2.226 | -1.791 |
| Response To Virus                                           | 2.219 | -1.496 |
| Regulation Of Cellular Metabolic Process                    | 2.185 | -0.612 |
| Multi Organism Process                                      | 2.18  | -1.086 |
| Proteolysis                                                 | 2.172 | -1.879 |
| Regulation Of Gene Expression                               | 2.08  | 0.819  |
| Positive Regulation Of Translation                          | 2.068 | -1.751 |
| Positive Regulation Of Multicellular Organismal Process     | 2.056 | -0.719 |
| Nucleolus                                                   | 2.039 | 2.011  |
| Membrane Fraction                                           | 2.028 | -1.553 |
| Nucleoplasm                                                 | 2.026 | 1.73   |
| Chemical Homeostasis                                        | 1.987 | -1.261 |

|                                                       |       |        |
|-------------------------------------------------------|-------|--------|
| Ion Homeostasis                                       | 1.987 | -1.261 |
| Membrane Enclosed Lumen                               | 1.92  | 1.651  |
| Nuclear Lumen                                         | 1.92  | 1.619  |
| Organelle Lumen                                       | 1.92  | 1.651  |
| Transcription Factor Activity                         | 1.909 | -1.8   |
| P                                                     | 1.894 | 1.893  |
| Biosynthetic Process                                  | 1.879 | -0.871 |
| Endosome                                              | 1.872 | -1.094 |
| Cytosol                                               | 1.845 | -1.397 |
| Cellular Defense Response                             | 1.84  | -0.912 |
| Nuclear Part                                          | 1.805 | 1.38   |
| Regulation Of Translation                             | 1.77  | -1.586 |
| Antigen Binding                                       | 1.756 | -0.18  |
| Phosphotransferase Activity Alcohol Group As Acceptor | 1.747 | 1.474  |
| Cytokine Activity                                     | 1.708 | -1.708 |
| Jak Stat Cascade                                      | 1.706 | -1.366 |
| Nucleoplasm Part                                      | 1.7   | 1.186  |
| Peptidase Activity                                    | 1.666 | 1.164  |
| Cellular Cation Homeostasis                           | 1.657 | 0.104  |
| Cellular Homeostasis                                  | 1.648 | -0.863 |
| Homeostatic Process                                   | 1.648 | -0.863 |
| Cytokine Metabolic Process                            | 1.566 | -1.364 |
| Serine Hydrolase Activity                             | 1.566 | 1.383  |
| Positive Regulation Of Cytokine Biosynthetic Process  | 1.528 | -1.196 |
| Regulation Of Protein Metabolic Process               | 1.467 | -1.388 |
| Serine Type Peptidase Activity                        | 1.464 | 1.294  |
| Endopeptidase Activity                                | 1.1   | -0.625 |
| Regulation Of Protein Modification Process            | 1.032 | -0.919 |
| Chemokine Receptor Binding                            | 0.995 | -0.993 |
| Positive Regulation Of Phosphate Metabolic Process    | 0.942 | 0.897  |

|                                                  |       |       |
|--------------------------------------------------|-------|-------|
| Serine Type Endopeptidase Activity               | 0.928 | 0.482 |
| Regulation Of Defense Response                   | 0.448 | 0.297 |
| Regulation Of Protein Amino Acid Phosphorylation | 0.435 | 0.267 |
| Positive Regulation Of Phosphorylation           | 0.416 | 0.234 |

Table E3

| Gene set name                                                     | Samples |      |      |       |      |      |       |      |       |       |       |       |       |       |       |       |       |       |       |       |       |       |       |       | Average difference |
|-------------------------------------------------------------------|---------|------|------|-------|------|------|-------|------|-------|-------|-------|-------|-------|-------|-------|-------|-------|-------|-------|-------|-------|-------|-------|-------|--------------------|
|                                                                   | HC-1    | HC-2 | HC-3 | HC-4  | HC-5 | HC-6 | HC-7  | HC-8 | HC-9  | HC-10 | HC-11 | HC-12 | CF-1  | CF-2  | CF-3  | CF-4  | CF-5  | CF-6  | CF-7  | CF-8  | CF-9  | CF-10 | CF-11 | CF-12 |                    |
| Signal Transduction                                               | 3.97    | 3.77 | 3.98 | -0.81 | 6.09 | 2.72 | -1.40 | 5.54 | 0.58  | 4.05  | -0.60 | 0.95  | -2.13 | -1.85 | -1.50 | -1.97 | -2.39 | -1.89 | -2.20 | -2.94 | -2.99 | -3.33 | -2.71 | -2.93 | -4.8079            |
| Membrane                                                          | 3.18    | 3.14 | 3.84 | -0.49 | 6.36 | 2.87 | -0.45 | 4.51 | -0.09 | 2.75  | -0.56 | 0.10  | -2.06 | -1.20 | -1.07 | -1.28 | -1.99 | -1.50 | -1.76 | -2.14 | -2.91 | -3.14 | -2.87 | -3.25 | -4.1956            |
| Plasma Membrane                                                   | 3.09    | 3.02 | 3.74 | -0.63 | 6.20 | 2.80 | -0.51 | 4.43 | -0.05 | 2.67  | -0.62 | 0.09  | -2.07 | -1.16 | -0.91 | -1.29 | -1.90 | -1.44 | -1.64 | -2.06 | -2.85 | -3.07 | -2.72 | -3.13 | -4.0411            |
| Membrane Part                                                     | 2.68    | 2.74 | 3.46 | 0.05  | 5.71 | 2.47 | -0.48 | 4.32 | -0.03 | 3.16  | -0.47 | 0.25  | -1.85 | -1.28 | -1.17 | -1.39 | -1.98 | -1.51 | -1.72 | -2.10 | -2.70 | -2.73 | -2.59 | -2.83 | -3.9764            |
| Extracellular Region                                              | 2.65    | 2.52 | 2.19 | 0.69  | 3.24 | 1.32 | -1.11 | 4.56 | 0.66  | 5.09  | -0.38 | 2.31  | -0.88 | -2.65 | -2.22 | -2.58 | -2.59 | -1.91 | -2.68 | -2.93 | -1.65 | -2.04 | -1.31 | -0.31 | -3.9571            |
| Extracellular Region Part                                         | 2.75    | 2.54 | 2.09 | 0.28  | 2.97 | 1.44 | -0.90 | 4.59 | 0.96  | 4.46  | -0.22 | 2.21  | -0.71 | -2.55 | -2.11 | -2.59 | -2.63 | -1.79 | -2.66 | -2.70 | -1.42 | -2.13 | -1.39 | -0.49 | -3.8636            |
| Extracellular Space                                               | 2.75    | 2.54 | 2.09 | 0.28  | 2.97 | 1.44 | -0.90 | 4.59 | 0.96  | 4.46  | -0.22 | 2.21  | -0.71 | -2.55 | -2.11 | -2.59 | -2.63 | -1.79 | -2.66 | -2.70 | -1.42 | -2.13 | -1.39 | -0.49 | -3.8636            |
| Cell Development                                                  | 2.21    | 1.89 | 1.72 | 1.04  | 3.16 | 1.14 | -0.35 | 4.56 | 0.19  | 5.48  | -0.08 | 1.66  | -1.03 | -2.27 | -1.93 | -2.24 | -2.73 | -1.62 | -2.48 | -2.44 | -1.66 | -2.19 | -1.27 | -0.78 | -3.772             |
| Defense Response                                                  | 3.02    | 2.60 | 2.61 | 0.66  | 3.78 | 2.16 | -1.15 | 3.95 | 0.25  | 3.57  | -0.59 | 1.35  | -1.49 | -1.35 | -1.30 | -1.58 | -1.92 | -1.38 | -1.85 | -2.15 | -2.41 | -2.58 | -2.12 | -2.08 | -3.703             |
| Intrinsic To Membrane                                             | 2.41    | 2.61 | 3.34 | -0.25 | 5.46 | 2.28 | -0.36 | 3.93 | 0.08  | 2.74  | -0.43 | 0.03  | -1.66 | -1.09 | -0.92 | -1.34 | -1.80 | -1.38 | -1.38 | -1.78 | -2.46 | -2.57 | -2.59 | -2.87 | -3.6403            |
| Plasma Membrane Part                                              | 2.47    | 2.54 | 3.31 | -0.25 | 5.51 | 2.39 | -0.50 | 4.04 | -0.03 | 2.79  | -0.57 | 0.10  | -1.83 | -1.15 | -0.98 | -1.28 | -1.72 | -1.43 | -1.38 | -1.87 | -2.48 | -2.52 | -2.41 | -2.75 | -3.6334            |
| Integral To Membrane                                              | 2.42    | 2.63 | 3.36 | -0.32 | 5.45 | 2.27 | -0.34 | 3.92 | 0.11  | 2.69  | -0.41 | 0.01  | -1.66 | -1.09 | -0.90 | -1.34 | -1.80 | -1.37 | -1.38 | -1.73 | -2.45 | -2.58 | -2.61 | -2.89 | -3.6323            |
| Intrinsic To Plasma Membrane                                      | 2.38    | 2.49 | 3.21 | -0.22 | 5.31 | 2.27 | -0.49 | 3.92 | 0.01  | 2.75  | -0.58 | 0.11  | -1.77 | -1.08 | -0.89 | -1.28 | -1.67 | -1.36 | -1.30 | -1.79 | -2.41 | -2.48 | -2.41 | -2.71 | -3.5232            |
| Integral To Plasma Membrane                                       | 2.40    | 2.52 | 3.23 | -0.29 | 5.29 | 2.26 | -0.47 | 3.91 | 0.03  | 2.71  | -0.56 | 0.08  | -1.77 | -1.08 | -0.87 | -1.28 | -1.66 | -1.35 | -1.30 | -1.74 | -2.40 | -2.48 | -2.42 | -2.74 | -3.5153            |
| Cell Surface Receptor Linked<br>Signal Transduction Go<br>0007166 | 2.55    | 2.66 | 2.59 | -0.54 | 3.86 | 1.91 | -0.94 | 3.59 | 0.39  | 2.31  | -0.31 | 0.48  | -1.44 | -1.44 | -0.68 | -1.50 | -1.27 | -1.13 | -1.53 | -1.88 | -1.78 | -1.90 | -1.94 | -2.07 | -3.0929            |
| Inflammatory Response                                             | 2.17    | 1.85 | 1.35 | 0.46  | 2.33 | 1.31 | -0.25 | 3.49 | 0.72  | 3.35  | 0.17  | 1.45  | -0.68 | -1.30 | -1.46 | -1.82 | -1.85 | -1.43 | -1.80 | -2.03 | -1.42 | -1.96 | -1.55 | -1.09 | -3.0651            |
| Response To Stress                                                | 2.31    | 1.77 | 1.32 | 0.83  | 2.43 | 1.39 | -0.29 | 3.37 | 0.53  | 3.34  | 0.11  | 1.25  | -0.83 | -1.27 | -1.30 | -1.76 | -1.73 | -1.40 | -1.65 | -2.15 | -1.61 | -1.91 | -1.56 | -1.19 | -3.0623            |
| Response To External Stimulus                                     | 2.91    | 2.44 | 2.46 | 0.25  | 3.44 | 2.02 | -1.24 | 2.89 | 0.04  | 2.55  | -0.55 | 0.91  | -1.48 | -1.17 | -1.01 | -1.06 | -1.22 | -1.12 | -1.30 | -2.09 | -1.96 | -2.31 | -1.64 | -1.73 | -3.0169            |
| Behavior                                                          | 2.31    | 2.35 | 2.18 | 0.02  | 3.20 | 1.43 | -1.27 | 3.30 | 0.57  | 2.98  | -0.41 | 1.34  | -1.00 | -1.54 | -1.33 | -1.84 | -1.42 | -1.29 | -1.48 | -2.21 | -1.41 | -1.72 | -1.50 | -1.27 | -3.0025            |
| Programmed Cell Death                                             | 2.09    | 1.64 | 1.79 | 0.62  | 3.02 | 1.08 | -0.42 | 3.41 | -0.16 | 4.08  | -0.22 | 0.94  | -1.21 | -1.47 | -1.23 | -1.48 | -2.14 | -1.02 | -1.82 | -1.73 | -1.60 | -1.97 | -1.16 | -1.05 | -2.9787            |
| System Development                                                | 1.93    | 2.01 | 2.50 | 0.02  | 4.35 | 1.64 | -1.27 | 3.15 | -0.18 | 3.12  | -0.67 | 0.92  | -1.39 | -1.56 | -0.97 | -1.06 | -1.41 | -1.32 | -1.29 | -1.81 | -1.99 | -1.86 | -1.48 | -1.35 | -2.9179            |
| Regulation Of Biological<br>Quality                               | 1.98    | 1.88 | 2.00 | 0.51  | 3.46 | 1.23 | -1.47 | 3.30 | 0.00  | 3.53  | -0.86 | 1.25  | -1.21 | -1.86 | -1.14 | -1.38 | -1.29 | -1.31 | -1.33 | -2.23 | -1.57 | -1.48 | -1.17 | -0.83 | -2.8003            |
| Negative Regulation Of Cellular<br>Process                        | 2.11    | 1.66 | 1.59 | 0.23  | 2.36 | 0.98 | -0.39 | 3.17 | 0.49  | 3.12  | 0.14  | 1.14  | -1.04 | -1.42 | -1.14 | -1.55 | -1.89 | -0.76 | -2.00 | -1.34 | -1.15 | -1.90 | -1.28 | -1.12 | -2.7633            |
| Response To Chemical Stimulus                                     | 2.15    | 2.06 | 2.02 | 0.63  | 2.83 | 1.21 | -1.11 | 2.69 | 0.15  | 2.75  | -0.26 | 1.12  | -0.91 | -1.48 | -1.45 | -1.35 | -1.28 | -1.12 | -1.37 | -2.13 | -1.36 | -1.49 | -1.34 | -0.94 | -2.7053            |
| Locomotory Behavior                                               | 2.10    | 2.06 | 1.86 | 0.35  | 2.78 | 1.22 | -1.03 | 2.69 | 0.46  | 2.57  | -0.24 | 1.20  | -0.86 | -1.45 | -1.31 | -1.61 | -1.16 | -1.23 | -1.23 | -2.07 | -1.26 | -1.50 | -1.35 | -0.99 | -2.6698            |
| Cytoplasm                                                         | 1.56    | 1.32 | 1.14 | 1.83  | 2.30 | 0.97 | -0.27 | 3.25 | -0.15 | 3.10  | -0.19 | 0.68  | -1.11 | -1.46 | -1.35 | -1.28 | -1.68 | -1.26 | -1.85 | -1.55 | -1.16 | -1.39 | -0.71 | -0.75 | -2.59              |
| Cell Cell Signaling                                               | 2.25    | 2.14 | 2.21 | 0.07  | 2.96 | 1.60 | -1.41 | 2.74 | 0.19  | 2.15  | -0.62 | 1.00  | -1.32 | -1.19 | -1.06 | -1.18 | -0.97 | -0.80 | -0.79 | -1.74 | -1.57 | -1.76 | -1.53 | -1.37 | -2.5467            |
| Biopolymer Metabolic Process                                      | 2.35    | 1.87 | 1.84 | 0.80  | 3.24 | 1.18 | -0.67 | 2.95 | 0.16  | 1.86  | -0.55 | 0.23  | -1.52 | -0.69 | -0.90 | -0.85 | -1.19 | -0.92 | -1.20 | -1.55 | -1.88 | -1.54 | -1.44 | -1.57 | -2.5436            |
| Nucleus                                                           | 1.78    | 1.15 | 0.83 | 1.99  | 2.06 | 0.96 | 0.01  | 2.87 | -0.27 | 2.79  | -0.24 | 0.42  | -0.96 | -1.58 | -1.17 | -0.95 | -1.54 | -0.93 | -1.75 | -1.58 | -1.02 | -1.49 | -0.61 | -0.77 | -2.3926            |
| Cell Fraction                                                     | 0.89    | 0.99 | 0.70 | 0.50  | 1.49 | 0.04 | 0.38  | 2.63 | 0.30  | 3.29  | 0.70  | 1.76  | 0.24  | -1.84 | -1.80 | -2.15 | -2.10 | -1.47 | -1.81 | -1.71 | -0.12 | -0.78 | -0.66 | 0.53  | -2.2776            |
| Response To Wounding                                              | 1.92    | 1.47 | 1.39 | 0.21  | 2.12 | 1.16 | -0.42 | 2.40 | 0.17  | 2.12  | -0.02 | 0.92  | -0.71 | -0.94 | -0.77 | -1.03 | -1.15 | -0.87 | -1.10 | -1.52 | -1.20 | -1.71 | -1.31 | -1.16 | -2.2436            |

|                                                                    |      |      |       |       |      |      |       |      |       |      |       |       |       |       |       |       |       |       |       |       |       |       |       |       |         |
|--------------------------------------------------------------------|------|------|-------|-------|------|------|-------|------|-------|------|-------|-------|-------|-------|-------|-------|-------|-------|-------|-------|-------|-------|-------|-------|---------|
| Regulation Of Developmental Process                                | 1.58 | 1.21 | 1.25  | -0.03 | 2.03 | 0.81 | 0.00  | 2.66 | 0.33  | 2.62 | 0.06  | 0.74  | -0.90 | -0.85 | -0.85 | -1.17 | -1.67 | -0.64 | -1.30 | -1.17 | -1.04 | -1.44 | -1.26 | -0.97 | -2.2131 |
| Reproductive Process                                               | 1.48 | 1.60 | 1.70  | -0.47 | 2.55 | 0.81 | -0.51 | 2.78 | 0.48  | 1.88 | -0.17 | 0.97  | -0.73 | -1.40 | -0.82 | -1.04 | -1.13 | -1.12 | -1.16 | -1.45 | -1.11 | -1.10 | -1.29 | -0.73 | -2.181  |
| Negative Regulation Of Apoptosis                                   | 1.10 | 0.76 | 0.53  | 0.98  | 1.27 | 0.43 | -0.36 | 2.65 | 0.02  | 4.22 | -0.12 | 1.46  | -0.65 | -1.53 | -1.30 | -1.23 | -1.68 | -0.97 | -1.52 | -1.65 | -0.82 | -1.03 | -0.45 | -0.09 | -2.1539 |
| Establishment Of Localization                                      | 0.89 | 0.93 | 1.29  | 0.30  | 2.15 | 0.69 | 0.18  | 2.73 | 0.33  | 2.13 | 0.38  | 0.85  | -0.93 | -0.93 | -1.06 | -0.96 | -1.20 | -0.80 | -1.21 | -1.21 | -1.27 | -1.15 | -1.17 | -0.99 | -2.1442 |
| Cell Surface                                                       | 1.38 | 1.38 | 1.51  | 0.10  | 2.28 | 1.23 | -0.08 | 2.20 | 0.06  | 2.01 | 0.07  | 0.46  | -0.96 | -0.41 | -0.88 | -0.68 | -1.20 | -0.87 | -1.30 | -1.37 | -1.38 | -1.45 | -0.99 | -1.12 | -2.0997 |
| Soluble Fraction                                                   | 0.65 | 0.82 | 0.39  | 0.54  | 0.81 | 0.02 | 0.52  | 2.27 | 0.50  | 3.23 | 0.88  | 1.78  | 0.38  | -1.80 | -1.76 | -2.07 | -1.86 | -1.48 | -1.73 | -1.63 | 0.12  | -0.69 | -0.58 | 0.70  | -2.0677 |
| Viral Genome Replication                                           | 1.16 | 1.39 | 1.11  | -0.21 | 1.68 | 0.60 | -0.33 | 2.64 | 0.51  | 2.36 | 0.00  | 1.17  | -0.20 | -1.48 | -1.16 | -1.37 | -1.38 | -1.21 | -1.36 | -1.41 | -0.52 | -0.89 | -0.88 | -0.21 | -2.0135 |
| Protein Kinase Cascade                                             | 1.65 | 1.36 | 1.11  | 0.35  | 2.06 | 1.00 | -0.08 | 2.09 | 0.10  | 1.88 | -0.08 | 0.40  | -0.96 | -0.67 | -0.71 | -0.69 | -0.97 | -0.62 | -1.00 | -1.39 | -1.45 | -1.57 | -0.89 | -0.93 | -1.9747 |
| Rna Metabolic Process                                              | 1.04 | 0.98 | 0.45  | 2.26  | 1.49 | 0.37 | -0.09 | 2.69 | -0.50 | 2.48 | -0.06 | 0.67  | -0.66 | -1.22 | -0.96 | -0.99 | -1.31 | -1.12 | -1.13 | -1.42 | -0.72 | -1.00 | -0.82 | -0.42 | -1.962  |
| Receptor Activity                                                  | 1.84 | 1.56 | 2.16  | -0.33 | 2.85 | 1.54 | -0.26 | 2.41 | 0.46  | 0.49 | -0.39 | -0.64 | -1.44 | -0.42 | 0.34  | -0.55 | -0.70 | 0.13  | -0.66 | -0.54 | -1.64 | -1.59 | -2.19 | -2.44 | -1.9476 |
| Apoptosis Go                                                       | 1.56 | 1.40 | 1.48  | -0.21 | 2.02 | 0.85 | -0.09 | 2.13 | 0.19  | 1.63 | -0.17 | 0.60  | -0.68 | -0.99 | -0.49 | -0.90 | -1.45 | -0.65 | -1.13 | -1.03 | -1.10 | -1.31 | -0.90 | -0.76 | -1.8987 |
| Nucleobasenucleosidenucleoti de And Nucleic Acid Metabolic Process | 1.61 | 1.27 | 1.15  | 1.09  | 2.28 | 0.39 | -0.18 | 2.58 | 0.02  | 1.26 | -0.17 | 0.09  | -1.03 | -0.36 | -0.76 | -0.78 | -1.28 | -0.85 | -0.91 | -0.91 | -1.21 | -1.03 | -1.06 | -1.20 | -1.8975 |
| Cellular Protein Metabolic Process                                 | 1.50 | 1.18 | 1.02  | 0.34  | 2.29 | 1.03 | 0.13  | 1.85 | 0.01  | 1.46 | -0.04 | 0.24  | -0.73 | -1.19 | -0.71 | -0.43 | -0.80 | -0.63 | -1.03 | -1.28 | -1.32 | -1.38 | -0.66 | -0.85 | -1.8326 |
| Protein Metabolic Process                                          | 1.47 | 1.14 | 1.01  | 0.28  | 2.27 | 1.03 | 0.14  | 2.00 | -0.12 | 1.54 | -0.11 | 0.24  | -0.75 | -1.26 | -0.68 | -0.46 | -0.75 | -0.58 | -0.99 | -1.31 | -1.29 | -1.31 | -0.70 | -0.78 | -1.8126 |
| Negative Regulation Of Cellular Metabolic Process                  | 0.49 | 0.46 | -0.34 | 0.90  | 0.41 | 0.16 | 0.65  | 2.53 | 0.48  | 3.05 | 0.65  | 1.42  | 0.22  | -1.53 | -1.32 | -1.76 | -1.94 | -1.04 | -1.55 | -1.35 | 0.18  | -0.61 | -0.54 | 0.38  | -1.8102 |
| Cell Proliferation Go 0008283                                      | 1.70 | 1.35 | 1.67  | -0.45 | 2.09 | 0.98 | -0.09 | 1.62 | 0.29  | 1.04 | 0.22  | 0.35  | -0.71 | -0.87 | -0.39 | -0.53 | -1.19 | -0.58 | -1.21 | -0.53 | -0.77 | -1.40 | -1.35 | -1.24 | -1.7942 |
| Organelle Organization And Biogenesis                              | 0.94 | 1.25 | 1.08  | -0.31 | 1.41 | 0.50 | -0.46 | 2.25 | 0.48  | 2.12 | 0.04  | 1.15  | -0.33 | -1.07 | -0.93 | -1.36 | -1.18 | -0.91 | -1.31 | -1.08 | -0.51 | -0.84 | -0.67 | -0.28 | -1.744  |
| Macromolecular Complex Assembly                                    | 1.24 | 1.00 | 1.22  | -0.06 | 2.42 | 0.85 | -0.20 | 2.05 | -0.10 | 1.42 | 0.11  | 0.36  | -1.23 | -0.41 | -0.36 | -0.45 | -0.76 | -0.51 | -0.67 | -0.90 | -1.65 | -1.31 | -0.75 | -1.30 | -1.716  |
| Macromolecular Complex                                             | 0.94 | 1.05 | 1.28  | 1.46  | 2.36 | 1.20 | -0.45 | 1.47 | -0.47 | 1.38 | -0.40 | 0.19  | -0.71 | -1.57 | -0.79 | -0.58 | -0.65 | -0.93 | -0.82 | -1.23 | -1.15 | -0.87 | -0.44 | -0.27 | -1.6678 |
| Protein Complex                                                    | 0.94 | 1.05 | 1.28  | 1.46  | 2.36 | 1.20 | -0.45 | 1.47 | -0.47 | 1.38 | -0.40 | 0.19  | -0.71 | -1.57 | -0.79 | -0.58 | -0.65 | -0.93 | -0.82 | -1.23 | -1.15 | -0.87 | -0.44 | -0.27 | -1.6678 |
| Multicellular Organismal Development                               | 0.77 | 1.24 | 1.76  | -0.89 | 3.40 | 1.27 | -0.10 | 1.54 | 0.06  | 0.69 | 0.08  | 0.14  | -0.99 | -0.92 | -0.27 | -0.27 | -0.81 | -0.71 | -0.49 | -0.43 | -1.14 | -1.36 | -1.36 | -1.23 | -1.6612 |
| Nervous System Development                                         | 1.14 | 1.37 | 1.62  | -0.45 | 2.53 | 0.84 | -0.70 | 1.91 | 0.09  | 1.20 | -0.31 | 0.65  | -0.98 | -0.72 | -0.32 | -0.55 | -0.60 | -0.56 | -0.73 | -0.87 | -1.36 | -1.21 | -0.98 | -1.01 | -1.6504 |
| I Kappab Kinase Nf Kappab Cascade                                  | 1.16 | 1.09 | 1.01  | 0.08  | 1.73 | 0.66 | 0.02  | 1.77 | 0.25  | 1.67 | 0.11  | 0.19  | -0.65 | -0.39 | -0.77 | -0.61 | -0.93 | -0.57 | -0.65 | -1.07 | -1.28 | -1.27 | -0.83 | -0.71 | -1.621  |
| Negative Regulation Of Biological Process                          | 1.61 | 1.17 | 1.51  | 0.06  | 1.75 | 0.80 | -0.48 | 1.72 | -0.08 | 1.31 | -0.22 | 0.56  | -0.74 | -0.86 | -0.45 | -0.66 | -1.12 | -0.45 | -1.03 | -0.70 | -0.74 | -1.21 | -0.96 | -0.78 | -1.6203 |
| Transcription Dna Dependent                                        | 1.24 | 1.09 | 0.75  | 1.68  | 1.59 | 0.58 | -0.26 | 2.16 | -0.17 | 1.21 | -0.24 | -0.02 | -0.94 | -0.14 | -0.63 | -0.54 | -1.05 | -0.86 | -0.75 | -0.90 | -0.99 | -0.91 | -0.86 | -1.04 | -1.6008 |
| Positive Regulation Of Developmental Process                       | 1.18 | 1.08 | 1.36  | -0.40 | 2.12 | 0.75 | -0.08 | 1.54 | 0.09  | 1.53 | 0.08  | 0.32  | -0.67 | -0.28 | -0.58 | -0.70 | -1.38 | -0.55 | -0.73 | -0.80 | -0.95 | -1.08 | -0.87 | -0.96 | -1.593  |
| Transmembrane Receptor Activity                                    | 1.43 | 1.01 | 1.08  | 0.52  | 1.85 | 0.67 | -0.38 | 2.10 | 0.12  | 1.72 | -0.41 | -0.21 | -0.89 | -0.90 | -0.19 | -0.77 | -0.91 | -0.37 | -0.61 | -0.38 | -1.18 | -0.92 | -1.31 | -1.08 | -1.5832 |
| Positive Regulation Of Biological Process                          | 1.30 | 1.20 | 1.53  | -0.47 | 2.04 | 0.64 | 0.14  | 1.48 | 0.43  | 0.95 | 0.06  | 0.15  | -0.45 | -0.46 | -0.31 | -0.57 | -1.27 | -0.55 | -0.66 | -0.70 | -1.22 | -1.07 | -1.25 | -0.99 | -1.5804 |
| Anatomical Structure Morphogenesis                                 | 0.73 | 0.93 | 1.04  | -0.34 | 2.13 | 0.70 | 0.00  | 1.81 | 0.08  | 1.21 | 0.24  | 0.82  | -0.85 | -0.80 | -0.58 | -0.31 | -0.86 | -0.87 | -0.68 | -0.65 | -1.21 | -1.14 | -0.96 | -0.43 | -1.5557 |
| Receptor Complex                                                   | 0.76 | 1.10 | 1.24  | -0.17 | 2.09 | 1.08 | 0.15  | 1.39 | 0.08  | 0.95 | 0.31  | 0.19  | -0.89 | -0.72 | -0.56 | -0.51 | -0.66 | -0.71 | -0.71 | -0.72 | -1.15 | -1.12 | -0.77 | -0.65 | -1.5263 |
| Post Translational Protein Modification                            | 1.01 | 0.65 | 0.35  | 0.42  | 1.20 | 0.69 | 0.51  | 1.63 | 0.34  | 1.60 | 0.32  | 0.29  | -0.71 | -0.54 | -0.71 | -0.56 | -0.99 | -0.42 | -1.03 | -0.95 | -0.90 | -1.14 | -0.49 | -0.56 | -1.4991 |

|                                                                                          |      |      |       |       |      |       |       |      |       |      |       |       |       |       |       |       |       |       |       |       |       |       |       |       |         |
|------------------------------------------------------------------------------------------|------|------|-------|-------|------|-------|-------|------|-------|------|-------|-------|-------|-------|-------|-------|-------|-------|-------|-------|-------|-------|-------|-------|---------|
| Biopolymer Modification                                                                  | 1.01 | 0.64 | 0.33  | 0.77  | 1.30 | 0.64  | 0.43  | 1.22 | 0.48  | 1.44 | 0.37  | 0.27  | -0.50 | -0.63 | -0.89 | -0.46 | -0.91 | -0.62 | -1.24 | -0.85 | -0.78 | -1.28 | -0.30 | -0.45 | -1.483  |
| Nuclear Import                                                                           | 0.48 | 0.65 | 0.30  | 0.87  | 0.55 | 0.11  | 0.12  | 1.98 | 0.06  | 2.44 | 0.30  | 0.86  | -0.19 | -1.03 | -0.76 | -1.37 | -1.10 | -0.65 | -1.06 | -0.84 | -0.34 | -0.73 | -0.65 | -0.03 | -1.456  |
| Positive Regulation Of Response To Stimulus                                              | 0.73 | 0.74 | 0.84  | 0.44  | 1.37 | 0.95  | -0.14 | 1.62 | 0.00  | 1.44 | 0.18  | 0.47  | -0.22 | -0.95 | -0.74 | -0.81 | -0.99 | -0.83 | -1.08 | -0.94 | -0.59 | -0.94 | -0.22 | -0.33 | -1.4408 |
| Chemokine Activity                                                                       | 0.73 | 0.85 | 0.86  | -0.26 | 1.13 | 0.53  | 0.05  | 1.52 | 0.35  | 1.51 | 0.26  | 1.05  | 0.16  | -1.07 | -0.93 | -1.20 | -1.08 | -0.73 | -1.20 | -1.10 | -0.15 | -0.68 | -0.53 | -0.10 | -1.4322 |
| G Protein Coupled Receptor Binding                                                       | 0.73 | 0.85 | 0.86  | -0.26 | 1.13 | 0.53  | 0.05  | 1.52 | 0.35  | 1.51 | 0.26  | 1.05  | 0.16  | -1.07 | -0.93 | -1.20 | -1.08 | -0.73 | -1.20 | -1.10 | -0.15 | -0.68 | -0.53 | -0.10 | -1.4322 |
| Establishment Of Protein Localization                                                    | 0.41 | 0.62 | 0.25  | 0.77  | 0.51 | 0.12  | 0.16  | 1.81 | 0.21  | 2.47 | 0.40  | 0.86  | -0.14 | -0.96 | -0.86 | -1.35 | -1.12 | -0.75 | -1.03 | -0.87 | -0.28 | -0.70 | -0.58 | 0.04  | -1.432  |
| Positive Regulation Of Cellular Process                                                  | 1.18 | 1.01 | 1.30  | -0.26 | 1.67 | 0.38  | 0.13  | 1.26 | 0.49  | 0.99 | 0.23  | 0.18  | -0.39 | -0.38 | -0.32 | -0.58 | -1.41 | -0.58 | -0.51 | -0.43 | -1.16 | -1.04 | -0.88 | -0.88 | -1.4257 |
| Regulation Of Dna Binding                                                                | 0.36 | 0.57 | 0.20  | 0.59  | 0.45 | 0.03  | 0.35  | 1.81 | 0.22  | 2.42 | 0.52  | 0.94  | -0.09 | -0.91 | -0.95 | -1.36 | -1.11 | -0.76 | -1.02 | -0.84 | -0.23 | -0.67 | -0.57 | 0.05  | -1.4106 |
| Positive Regulation Of Signal Transduction                                               | 1.12 | 0.89 | 1.07  | 0.07  | 1.83 | 0.70  | -0.24 | 1.43 | 0.18  | 1.40 | -0.02 | 0.03  | -0.65 | -0.43 | -0.58 | -0.49 | -0.66 | -0.46 | -0.41 | -0.88 | -1.21 | -1.15 | -0.83 | -0.72 | -1.4082 |
| Transport                                                                                | 0.79 | 0.67 | 1.50  | -0.28 | 2.16 | 0.63  | 0.37  | 1.65 | 0.02  | 0.59 | 0.06  | 0.13  | -1.09 | -0.32 | -0.38 | 0.12  | -0.37 | -0.27 | -0.40 | -0.61 | -1.20 | -0.97 | -1.35 | -1.44 | -1.3796 |
| Response To Virus                                                                        | 0.06 | 0.70 | 0.14  | 1.41  | 0.50 | -0.25 | 0.00  | 1.39 | 0.07  | 2.43 | 0.06  | 1.49  | 0.04  | -1.47 | -1.45 | -1.42 | -1.07 | -1.17 | -0.98 | -1.22 | -0.23 | 0.17  | -0.23 | 1.02  | -1.336  |
| Rna Biosynthetic Process                                                                 | 1.05 | 1.10 | 0.80  | 0.97  | 1.38 | 0.45  | -0.26 | 1.89 | -0.10 | 0.71 | -0.32 | 0.04  | -0.60 | -0.05 | -0.45 | -0.31 | -0.99 | -0.78 | -0.49 | -0.66 | -0.90 | -0.86 | -0.59 | -1.02 | -1.2846 |
| Negative Regulation Of Nucleobasenucleosidenucleotide And Nucleic Acid Metabolic Process | 0.35 | 0.44 | -0.01 | 1.33  | 0.42 | -0.07 | 0.23  | 1.70 | -0.02 | 2.15 | 0.35  | 0.81  | -0.01 | -1.15 | -0.82 | -1.15 | -1.00 | -0.77 | -0.95 | -0.93 | -0.04 | -0.53 | -0.61 | 0.27  | -1.2815 |
| Regulation Of Signal Transduction                                                        | 0.99 | 0.92 | 1.18  | -0.06 | 1.66 | 0.60  | -0.29 | 1.29 | 0.22  | 1.15 | -0.13 | 0.09  | -0.61 | -0.31 | -0.52 | -0.51 | -0.62 | -0.36 | -0.24 | -0.78 | -1.10 | -0.90 | -0.95 | -0.74 | -1.2726 |
| Protein Oligomerization                                                                  | 0.72 | 0.73 | 0.66  | 0.41  | 0.92 | 0.55  | -0.23 | 1.62 | 0.09  | 1.32 | 0.01  | 0.17  | -0.66 | -0.20 | -0.34 | -0.71 | -0.65 | -0.34 | -0.78 | -0.54 | -0.92 | -0.87 | -0.31 | -0.65 | -1.1618 |
| Regulation Of Molecular Function                                                         | 0.57 | 0.44 | 0.20  | -0.25 | 1.14 | -0.14 | 0.33  | 1.80 | 0.52  | 1.73 | 0.27  | 0.23  | 0.66  | -0.77 | -0.97 | -0.93 | -1.04 | -1.02 | -0.94 | -0.87 | -0.24 | -0.74 | -0.15 | 0.16  | -1.1428 |
| Positive Regulation Of I Kappab Kinase Nf Kappab Cascade                                 | 0.85 | 0.91 | 1.13  | -0.26 | 1.50 | 0.50  | -0.18 | 1.22 | 0.30  | 0.84 | -0.09 | 0.01  | -0.52 | -0.27 | -0.25 | -0.34 | -0.42 | -0.23 | -0.17 | -0.68 | -1.06 | -0.91 | -1.11 | -0.76 | -1.1212 |
| Regulation Of Kinase Activity                                                            | 0.42 | 0.45 | 0.17  | -0.09 | 1.06 | -0.07 | 0.30  | 1.61 | 0.46  | 1.87 | 0.12  | 0.28  | 0.47  | -0.73 | -0.99 | -0.85 | -1.01 | -0.87 | -1.01 | -0.80 | -0.29 | -0.57 | -0.07 | 0.14  | -1.0954 |
| Regulation Of Protein Kinase Activity                                                    | 0.42 | 0.45 | 0.17  | -0.09 | 1.06 | -0.07 | 0.30  | 1.61 | 0.46  | 1.87 | 0.12  | 0.28  | 0.47  | -0.73 | -0.99 | -0.85 | -1.01 | -0.87 | -1.01 | -0.80 | -0.29 | -0.57 | -0.07 | 0.14  | -1.0954 |
| Protein Modification Process                                                             | 0.69 | 0.39 | 0.32  | 0.64  | 1.13 | 0.46  | 0.35  | 1.03 | 0.17  | 0.89 | 0.11  | 0.15  | -0.53 | -0.57 | -0.44 | -0.36 | -0.48 | -0.42 | -0.92 | -0.53 | -0.59 | -0.86 | -0.32 | -0.30 | -1.0532 |
| Dna Binding                                                                              | 0.73 | 0.46 | 0.73  | 1.82  | 1.29 | 0.04  | -0.34 | 1.73 | -0.57 | 1.28 | -0.56 | -0.35 | -0.57 | -0.86 | -0.70 | -0.30 | -0.49 | -0.28 | -0.84 | -0.47 | -0.35 | -0.45 | -0.49 | -0.47 | -1.0436 |
| Cellular Component Assembly                                                              | 0.99 | 0.64 | 0.59  | 0.13  | 1.40 | 0.63  | 0.00  | 0.86 | -0.38 | 1.04 | 0.18  | 0.17  | -0.55 | -0.37 | -0.42 | -0.37 | -0.64 | -0.18 | -0.52 | -0.78 | -0.66 | -0.84 | -0.24 | -0.70 | -1.0429 |
| Regulation Of Secretion                                                                  | 0.64 | 0.59 | 0.55  | 0.23  | 0.76 | 0.49  | -0.16 | 1.45 | 0.25  | 1.29 | 0.04  | 0.14  | -0.49 | -0.17 | -0.36 | -0.74 | -0.65 | -0.18 | -0.67 | -0.36 | -0.86 | -0.79 | -0.37 | -0.61 | -1.0425 |
| Regulation Of Apoptosis                                                                  | 0.94 | 0.69 | 0.87  | -0.01 | 1.17 | 0.51  | -0.24 | 1.18 | 0.01  | 1.04 | -0.37 | 0.37  | -0.33 | -0.49 | -0.26 | -0.51 | -1.28 | -0.37 | -0.58 | -0.35 | -0.61 | -0.64 | -0.45 | -0.30 | -1.0279 |
| Cellular Macromolecule Metabolic Process                                                 | 1.02 | 0.58 | 0.60  | 0.52  | 1.55 | 0.38  | -0.02 | 1.19 | -0.21 | 0.67 | -0.27 | 0.11  | -0.41 | -1.46 | -0.31 | -0.28 | -0.42 | -0.33 | -0.60 | -0.79 | -0.71 | -0.53 | -0.27 | -0.01 | -1.0191 |
| Enzyme Linked Receptor Protein Signaling Pathway                                         | 0.97 | 0.71 | 0.53  | 0.15  | 1.17 | 0.63  | 0.03  | 0.85 | -0.11 | 0.81 | 0.14  | 0.22  | -0.53 | -0.39 | -0.20 | -0.17 | -0.34 | -0.34 | -0.41 | -0.81 | -1.02 | -0.73 | -0.25 | -0.91 | -1.0169 |
| Transcription                                                                            | 0.84 | 0.97 | 0.59  | 0.60  | 0.93 | 0.16  | -0.04 | 1.64 | 0.24  | 0.21 | -0.26 | 0.06  | -0.58 | 0.39  | -0.20 | -0.13 | -0.78 | -0.81 | -0.17 | -0.45 | -0.72 | -0.79 | -0.47 | -1.23 | -0.9911 |
| Identical Protein Binding                                                                | 0.83 | 0.69 | 0.41  | 0.56  | 0.95 | 0.36  | 0.07  | 0.72 | 0.03  | 0.85 | 0.02  | 0.38  | -0.31 | -0.31 | -0.71 | -0.26 | -0.75 | -0.47 | -0.44 | -0.50 | -0.52 | -0.77 | -0.38 | -0.45 | -0.9796 |
| Cellular Homeostasis                                                                     | 1.43 | 1.44 | 1.62  | -0.07 | 1.71 | 1.02  | -1.77 | 0.67 | 0.02  | 0.61 | -1.08 | 0.23  | -0.94 | -0.34 | -0.33 | -0.38 | 0.09  | -0.24 | 0.17  | -0.88 | -0.86 | -0.67 | -0.77 | -0.68 | -0.9715 |
| Homeostatic Process                                                                      | 1.43 | 1.44 | 1.62  | -0.07 | 1.71 | 1.02  | -1.77 | 0.67 | 0.02  | 0.61 | -1.08 | 0.23  | -0.94 | -0.34 | -0.33 | -0.38 | 0.09  | -0.24 | 0.17  | -0.88 | -0.86 | -0.67 | -0.77 | -0.68 | -0.9715 |
| Interleukin Binding                                                                      | 0.89 | 0.81 | 0.99  | -0.41 | 1.57 | 0.40  | -0.20 | 1.13 | -0.03 | 0.67 | 0.08  | -0.07 | -0.56 | -0.57 | -0.15 | -0.65 | -0.51 | -0.03 | -0.35 | -0.40 | -0.80 | -0.59 | -0.56 | -0.64 | -0.9692 |

|                                                         |       |       |       |       |       |       |       |       |       |       |       |       |       |       |       |       |       |       |       |       |       |       |       |       |         |
|---------------------------------------------------------|-------|-------|-------|-------|-------|-------|-------|-------|-------|-------|-------|-------|-------|-------|-------|-------|-------|-------|-------|-------|-------|-------|-------|-------|---------|
| Regulation Of Programmed Cell Death                     | 0.71  | 0.58  | 0.80  | -0.25 | 1.13  | 0.31  | 0.15  | 0.84  | 0.30  | 0.84  | 0.03  | 0.31  | -0.14 | -0.35 | -0.15 | -0.41 | -1.44 | -0.42 | -0.43 | -0.30 | -0.72 | -0.56 | -0.45 | -0.37 | -0.9571 |
| Chemical Homeostasis                                    | 1.38  | 1.52  | 1.63  | -0.27 | 1.64  | 0.97  | -1.64 | 0.75  | 0.14  | 0.51  | -1.02 | 0.13  | -0.91 | -0.35 | -0.19 | -0.45 | 0.14  | -0.22 | 0.16  | -0.85 | -0.79 | -0.70 | -0.77 | -0.81 | -0.9567 |
| Ion Homeostasis                                         | 1.38  | 1.52  | 1.63  | -0.27 | 1.64  | 0.97  | -1.64 | 0.75  | 0.14  | 0.51  | -1.02 | 0.13  | -0.91 | -0.35 | -0.19 | -0.45 | 0.14  | -0.22 | 0.16  | -0.85 | -0.79 | -0.70 | -0.77 | -0.81 | -0.9567 |
| Dna Metabolic Process                                   | 0.95  | 0.62  | 0.90  | -0.31 | 1.59  | 0.00  | -0.23 | 1.33  | -0.04 | 0.64  | -0.17 | 0.46  | -0.46 | -0.67 | -0.30 | -0.53 | -0.67 | -0.28 | -0.45 | -0.30 | -0.72 | -0.45 | -0.39 | -0.50 | -0.9533 |
| Jak Stat Cascade                                        | 1.48  | 1.31  | 1.86  | -0.26 | 1.73  | 0.97  | -1.65 | 0.91  | 0.14  | 0.21  | -1.22 | 0.21  | -1.18 | -0.43 | -0.28 | -0.17 | 0.45  | -0.26 | 0.04  | -0.77 | -1.35 | -0.20 | -0.67 | -0.88 | -0.9484 |
| Membrane Fraction                                       | 0.84  | 0.89  | 1.10  | -1.05 | 1.96  | 0.16  | -0.05 | 1.51  | -0.11 | 0.39  | -0.07 | -0.05 | -0.27 | -0.46 | -0.01 | -0.38 | -0.88 | -0.35 | -0.35 | -0.10 | -0.50 | -0.51 | -0.67 | -1.03 | -0.9208 |
| Intracellular Signaling Cascade                         | 0.80  | 0.85  | 0.89  | 0.07  | 1.18  | 0.05  | -0.30 | 0.79  | 0.23  | 0.69  | 0.06  | -0.02 | -0.39 | -0.16 | -0.18 | -0.50 | -0.44 | -0.40 | 0.28  | -0.45 | -1.12 | -0.78 | -0.62 | -0.54 | -0.8828 |
| Protein Amino Acid Phosphorylation                      | 0.53  | 0.34  | 0.29  | 0.53  | 0.81  | 0.15  | 0.45  | 0.89  | 0.32  | 0.73  | 0.23  | -0.02 | -0.29 | -0.36 | -0.37 | -0.42 | -0.46 | -0.54 | -0.63 | -0.34 | -0.63 | -0.56 | -0.26 | -0.38 | -0.873  |
| Regulation Of I                                         | 0.68  | 0.73  | 0.83  | -0.01 | 1.01  | 0.16  | -0.24 | 0.80  | 0.33  | 0.71  | 0.09  | 0.02  | -0.41 | -0.13 | -0.19 | -0.41 | -0.39 | -0.22 | 0.17  | -0.33 | -1.07 | -0.93 | -0.59 | -0.63 | -0.8517 |
| Leukocyte Activation                                    | 0.28  | 0.47  | 0.53  | 1.16  | 0.88  | 0.21  | -0.02 | 0.55  | 0.05  | 0.65  | 0.16  | 0.09  | -0.23 | -0.29 | -0.39 | -0.11 | -0.36 | -0.29 | -0.19 | -0.69 | -0.65 | -0.36 | -0.75 | -0.69 | -0.8344 |
| Phosphorylation                                         | 0.52  | 0.40  | 0.33  | 0.37  | 0.72  | 0.20  | 0.52  | 0.80  | 0.16  | 0.70  | 0.21  | -0.09 | -0.27 | -0.30 | -0.33 | -0.37 | -0.44 | -0.44 | -0.52 | -0.29 | -0.63 | -0.54 | -0.28 | -0.40 | -0.8056 |
| Cellular Defense Response                               | 1.25  | 1.03  | 1.47  | -0.30 | 2.23  | 1.16  | -1.34 | 1.04  | -0.58 | 0.34  | -1.33 | -0.16 | -0.64 | 0.33  | -0.04 | 0.39  | 0.05  | -0.30 | 0.02  | -0.46 | -1.66 | -0.87 | -0.61 | -1.02 | -0.8017 |
| Membrane Organization And Biogenesis                    | 0.73  | 0.63  | 1.40  | -0.81 | 1.93  | 0.76  | -0.01 | 1.24  | -0.52 | 0.18  | -0.66 | -0.19 | -0.96 | 0.08  | -0.02 | 0.41  | 0.03  | 0.14  | 0.03  | -0.33 | -0.76 | -0.66 | -1.35 | -1.28 | -0.7792 |
| Carbohydrate Binding                                    | 0.16  | -0.15 | 0.46  | -0.70 | 1.27  | 0.31  | 0.62  | 1.84  | -0.60 | 1.44  | -0.46 | 0.46  | -0.95 | 0.00  | -0.43 | 0.13  | -0.06 | -0.17 | 0.15  | -0.56 | -0.71 | -0.36 | -0.89 | -0.76 | -0.7708 |
| Transcription Factor Activity                           | 0.58  | 0.43  | 0.55  | 1.69  | 1.03  | 0.07  | -0.68 | 1.38  | -0.79 | 1.34  | -0.78 | -0.26 | -0.50 | -0.62 | -0.50 | -0.12 | -0.20 | -0.22 | -0.68 | -0.56 | -0.39 | -0.26 | -0.23 | -0.31 | -0.764  |
| Regulation Of Cellular Metabolic Process                | 0.65  | 0.42  | 0.53  | 0.77  | 1.16  | -0.04 | -0.41 | 1.34  | -0.45 | 1.03  | -0.38 | -0.26 | -0.27 | -0.63 | -0.30 | -0.38 | -0.50 | -0.21 | -0.49 | -0.23 | -0.32 | -0.38 | -0.38 | -0.29 | -0.7286 |
| Proteolysis                                             | 0.62  | 0.67  | 0.91  | -0.66 | 1.45  | 0.61  | -0.29 | 0.93  | -0.08 | 0.08  | -0.29 | -0.17 | -0.16 | -0.62 | -0.12 | 0.16  | 0.11  | -0.34 | 0.05  | -0.19 | -0.48 | -0.81 | -0.77 | -0.61 | -0.629  |
| Chemokine Receptor Binding                              | 0.77  | 0.75  | 1.27  | -1.31 | 1.77  | 0.88  | -0.43 | 0.46  | -0.23 | -0.36 | -0.30 | 0.02  | -0.65 | -0.50 | 0.53  | -0.16 | 0.29  | 0.27  | 0.22  | -0.01 | -0.48 | -0.87 | -0.53 | -1.40 | -0.547  |
| Antigen Binding                                         | 0.28  | 0.59  | 0.95  | -1.10 | 0.70  | 1.04  | 0.42  | 0.24  | 0.49  | -0.65 | 0.36  | -0.67 | -0.51 | 0.44  | 0.55  | 0.23  | -0.13 | 0.56  | -0.28 | -0.10 | -0.10 | -1.07 | -0.79 | -1.44 | -0.4394 |
| Mitochondrion                                           | 0.43  | 0.28  | 0.28  | -0.27 | 0.62  | -0.64 | -0.31 | 0.98  | 0.21  | 0.28  | 0.42  | -0.17 | -0.26 | -0.34 | 0.32  | 0.14  | -0.53 | -0.03 | 0.29  | 0.44  | -0.57 | -0.25 | -0.46 | -0.85 | -0.3526 |
| Organelle Membrane                                      | 0.63  | 0.42  | 0.22  | -0.33 | 0.20  | 0.82  | -0.15 | 0.35  | -0.07 | -0.02 | -0.17 | 0.14  | -0.47 | -0.07 | -0.03 | 0.49  | 0.22  | -0.08 | -0.31 | -0.12 | -0.15 | -0.72 | -0.35 | -0.47 | -0.3404 |
| Lysosome                                                | 0.58  | 0.48  | 0.23  | -0.53 | 0.23  | 0.74  | -0.11 | 0.21  | 0.08  | -0.14 | 0.04  | 0.18  | -0.51 | -0.09 | 0.09  | 0.47  | 0.17  | -0.06 | -0.28 | -0.08 | -0.21 | -0.76 | -0.27 | -0.45 | -0.3284 |
| Lytic Vacuole                                           | 0.58  | 0.48  | 0.23  | -0.53 | 0.23  | 0.74  | -0.11 | 0.21  | 0.08  | -0.14 | 0.04  | 0.18  | -0.51 | -0.09 | 0.09  | 0.47  | 0.17  | -0.06 | -0.28 | -0.08 | -0.21 | -0.76 | -0.27 | -0.45 | -0.3284 |
| Vacuole                                                 | 0.57  | 0.48  | 0.23  | -0.55 | 0.22  | 0.75  | -0.10 | 0.20  | 0.08  | -0.14 | 0.03  | 0.19  | -0.51 | -0.10 | 0.09  | 0.47  | 0.17  | -0.05 | -0.29 | -0.06 | -0.20 | -0.76 | -0.27 | -0.45 | -0.3266 |
| Cytoplasmic Part                                        | 1.21  | 0.20  | 0.69  | -2.80 | 1.19  | 0.72  | 0.22  | 0.39  | 0.51  | -0.56 | -0.05 | -0.40 | 0.09  | 0.13  | 0.90  | 0.37  | -0.36 | 0.45  | 0.14  | 0.54  | -0.76 | -1.01 | -0.56 | -1.23 | -0.2159 |
| Regulation Of Gene Expression                           | -0.10 | 0.35  | -0.07 | 0.12  | 0.01  | 0.81  | 0.16  | -0.19 | 0.27  | -1.63 | 0.32  | 0.34  | 0.06  | -0.39 | 0.08  | -0.31 | -0.54 | 0.22  | 0.50  | -0.75 | 0.15  | 0.30  | -0.39 | 0.67  | -0.0647 |
| Serine Hydrolase Activity                               | -0.18 | -0.18 | 0.13  | -0.86 | 0.21  | 0.08  | 0.78  | 0.30  | 1.15  | -0.48 | 0.34  | -1.28 | 0.43  | -0.45 | 0.89  | 0.31  | 0.31  | 0.34  | 0.05  | 0.88  | 0.22  | -1.06 | -0.59 | -1.35 | -0.0014 |
| Serine Type Peptidase Activity                          | -0.17 | -0.17 | 0.13  | -0.86 | 0.22  | 0.08  | 0.77  | 0.30  | 1.15  | -0.49 | 0.34  | -1.29 | 0.43  | -0.46 | 0.89  | 0.31  | 0.31  | 0.34  | 0.06  | 0.87  | 0.22  | -1.05 | -0.59 | -1.35 | -0.0014 |
| Nucleolus                                               | 0.35  | 0.17  | 0.27  | -0.28 | 0.39  | -0.35 | 0.39  | -0.40 | 0.38  | -0.76 | 0.11  | -0.38 | -0.03 | -0.17 | 0.31  | -0.42 | -0.44 | 0.26  | -0.09 | 0.15  | 0.48  | -0.13 | 0.17  | 0.01  | 0.01819 |
| Regulation Of Defense Response                          | -0.40 | -0.42 | 0.04  | -1.36 | -0.16 | -0.63 | 1.13  | 0.86  | 0.80  | 0.25  | 0.27  | -0.51 | 0.52  | 0.20  | 0.61  | -0.22 | -0.13 | -0.19 | 0.01  | 0.28  | 0.62  | 0.02  | -1.15 | -0.45 | 0.02198 |
| Endopeptidase Activity                                  | -0.17 | -0.22 | 0.09  | -0.86 | 0.21  | 0.05  | 0.77  | 0.31  | 1.10  | -0.50 | 0.29  | -1.28 | 0.47  | -0.44 | 0.91  | 0.30  | 0.37  | 0.36  | 0.13  | 0.86  | 0.23  | -1.03 | -0.60 | -1.35 | 0.03511 |
| Serine Type Endopeptidase Activity                      | -0.18 | -0.24 | 0.08  | -0.86 | 0.19  | 0.06  | 0.78  | 0.31  | 1.10  | -0.49 | 0.30  | -1.27 | 0.47  | -0.43 | 0.91  | 0.30  | 0.36  | 0.36  | 0.13  | 0.86  | 0.24  | -1.03 | -0.59 | -1.35 | 0.03734 |
| Positive Regulation Of Phosphorylation                  | -0.16 | 0.29  | -0.05 | -1.15 | -0.45 | -0.16 | 0.86  | 0.33  | 0.95  | -1.00 | 0.72  | -0.52 | 0.35  | 0.21  | 0.17  | 0.11  | -0.31 | 0.13  | -0.16 | 0.58  | 0.46  | 0.03  | -0.20 | -1.05 | 0.05471 |
| Positive Regulation Of Multicellular Organismal Process | -0.54 | -0.04 | -0.18 | -0.59 | -0.27 | -0.63 | 0.41  | 0.42  | 0.04  | 0.91  | 0.07  | -0.18 | -0.45 | 0.54  | -0.04 | 0.67  | 0.27  | 0.22  | 0.37  | -0.41 | 0.22  | 0.38  | -1.17 | -0.02 | 0.09708 |



|                                                             |       |       |       |       |       |       |       |       |       |       |       |       |       |       |       |       |       |       |       |       |       |       |       |       |         |
|-------------------------------------------------------------|-------|-------|-------|-------|-------|-------|-------|-------|-------|-------|-------|-------|-------|-------|-------|-------|-------|-------|-------|-------|-------|-------|-------|-------|---------|
| P                                                           | -0.07 | -0.47 | -0.11 | 0.64  | -0.38 | 0.61  | -0.59 | 0.41  | -0.46 | 0.28  | -0.67 | 0.18  | -0.07 | 0.08  | 0.05  | 0.31  | 0.27  | 0.15  | -0.12 | -0.25 | -0.16 | -0.03 | 0.26  | 0.14  | 0.10405 |
| Regulation Of Protein Modification Process                  | -0.31 | -0.15 | -1.24 | -0.20 | 0.07  | -0.06 | 0.64  | 1.29  | -0.44 | -0.03 | 0.34  | -0.53 | 0.78  | 0.34  | 1.17  | 0.50  | -0.23 | -0.13 | -0.77 | 0.23  | 0.75  | -1.53 | -0.41 | -0.08 | 0.10411 |
| Cytosol                                                     | 0.43  | -0.33 | -0.12 | -1.45 | -0.02 | 0.30  | 0.29  | 0.81  | 0.26  | -0.69 | 0.28  | -0.45 | 0.13  | 0.22  | 1.06  | -0.15 | 0.06  | 0.05  | 0.34  | 0.78  | -0.11 | -0.32 | -0.57 | -0.82 | 0.11387 |
| Regulation Of Protein Amino Acid Phosphorylation            | -0.29 | -0.11 | -1.25 | -0.28 | -0.03 | -0.14 | 0.79  | 1.28  | -0.30 | -0.13 | 0.40  | -0.66 | 0.92  | 0.34  | 1.14  | 0.49  | -0.31 | -0.20 | -0.73 | 0.33  | 0.83  | -1.51 | -0.42 | -0.19 | 0.11662 |
| Peptidase Activity                                          | -0.14 | -0.19 | 0.05  | -1.01 | -0.18 | 0.06  | 0.98  | 0.06  | 1.23  | -0.60 | 0.38  | -1.34 | 0.46  | -0.20 | 0.95  | 0.26  | 0.33  | 0.41  | 0.00  | 1.09  | 0.31  | -0.99 | -0.53 | -1.38 | 0.11788 |
| Cell Cell Adhesion                                          | 0.27  | 0.27  | 0.19  | -1.13 | -0.61 | -0.29 | 0.22  | 0.20  | 0.22  | -0.11 | 0.74  | -0.83 | -0.08 | 0.51  | 0.24  | 0.48  | 0.55  | 0.28  | 0.00  | 0.93  | 0.23  | -0.22 | -1.05 | -1.02 | 0.141   |
| Regulation Of Protein Metabolic Process                     | -0.37 | -0.01 | -1.32 | -0.73 | 0.32  | -0.30 | 0.48  | 2.01  | -0.39 | 0.52  | -0.39 | -0.66 | 0.36  | 0.75  | 1.31  | 0.52  | -0.11 | 0.04  | -0.57 | 0.26  | 0.83  | -1.66 | -0.57 | -0.32 | 0.14167 |
| Positive Regulation Of Phosphate Metabolic Process          | -0.18 | -0.39 | -0.67 | -1.34 | -0.42 | -0.40 | 0.67  | 0.53  | 0.96  | -0.43 | 0.72  | -0.54 | 0.61  | 0.66  | 0.68  | 0.27  | -0.47 | 0.42  | 0.03  | 0.93  | 1.05  | -0.09 | -1.24 | -1.37 | 0.24837 |
| T Cell Proliferation                                        | 0.06  | -0.04 | 0.53  | -2.21 | 0.25  | 0.00  | 0.65  | -0.52 | 0.26  | -0.06 | 0.10  | -0.55 | 0.28  | 0.67  | 0.63  | 0.27  | -0.45 | 0.14  | -0.22 | 0.49  | -0.05 | 0.15  | -0.14 | -0.25 | 0.25257 |
| Phosphotransferase Activity Alcohol Group As Acceptor       | -0.03 | -0.17 | -0.02 | -0.86 | -0.24 | 0.25  | 0.41  | 0.00  | 0.56  | -1.00 | 0.39  | -0.98 | 0.34  | 0.63  | 0.22  | 0.56  | 0.21  | 0.63  | -0.67 | 0.41  | 0.30  | 0.02  | 0.09  | -1.04 | 0.2823  |
| Cytokine Metabolic Process                                  | -0.27 | 0.25  | 0.10  | -1.78 | -0.04 | -0.53 | 0.44  | 0.72  | 0.40  | 0.00  | -0.26 | -0.73 | 0.14  | 0.55  | 0.74  | 0.68  | 0.09  | 0.27  | -0.03 | 0.15  | 0.52  | -0.88 | -0.40 | -0.12 | 0.28348 |
| Response To Other Organism                                  | 0.53  | 0.08  | -0.06 | -1.20 | -0.57 | 0.63  | 0.17  | -0.61 | 0.00  | -0.61 | -0.16 | -0.10 | -0.09 | -0.17 | 0.95  | 0.54  | 0.49  | 0.75  | -0.14 | 0.78  | 0.03  | -0.56 | 0.01  | -0.71 | 0.31243 |
| Nuclear Lumen                                               | -0.77 | -0.43 | -0.47 | -0.32 | -0.97 | 0.18  | 0.12  | -0.30 | 0.34  | 0.08  | 0.26  | 0.40  | -0.41 | 1.02  | -0.01 | -0.01 | 0.65  | 0.26  | 0.16  | 0.21  | -0.25 | -0.16 | 0.29  | 0.14  | 0.31645 |
| Nucleoplasm Part                                            | -0.69 | -0.31 | -0.34 | -0.46 | -0.76 | 0.10  | 0.05  | -0.37 | 0.35  | -0.10 | 0.22  | 0.35  | -0.40 | 1.12  | 0.07  | -0.05 | 0.39  | 0.25  | 0.19  | 0.39  | -0.19 | -0.18 | 0.26  | 0.11  | 0.32793 |
| Response To Biotic Stimulus                                 | 0.39  | 0.07  | -0.04 | -1.40 | -0.74 | 0.24  | 0.84  | -0.80 | 0.66  | -0.90 | 0.37  | -0.66 | 0.08  | -0.04 | 1.04  | 0.12  | 0.39  | 0.58  | -0.02 | 0.72  | 0.57  | -0.68 | 0.02  | -0.81 | 0.32826 |
| Regulation Of Translation                                   | -0.23 | 0.23  | 0.11  | -1.62 | -0.04 | -0.58 | 0.39  | 0.59  | 0.29  | -0.03 | -0.31 | -0.79 | 0.15  | 0.56  | 0.77  | 0.71  | 0.25  | 0.28  | -0.02 | 0.10  | 0.49  | -0.94 | -0.33 | -0.03 | 0.33275 |
| Nucleoplasm                                                 | -0.75 | -0.40 | -0.41 | -0.37 | -0.96 | 0.13  | 0.11  | -0.34 | 0.35  | -0.01 | 0.25  | 0.37  | -0.37 | 1.08  | 0.00  | -0.03 | 0.61  | 0.25  | 0.18  | 0.24  | -0.24 | -0.13 | 0.29  | 0.13  | 0.33583 |
| Nuclear Part                                                | -0.87 | -0.40 | -0.52 | -0.15 | -1.05 | -0.01 | 0.08  | -0.36 | 0.28  | 0.16  | 0.32  | 0.49  | -0.34 | 1.02  | -0.08 | -0.08 | 0.58  | 0.24  | 0.13  | 0.20  | -0.13 | 0.00  | 0.31  | 0.18  | 0.33743 |
| Membrane Enclosed Lumen                                     | -0.79 | -0.43 | -0.45 | -0.34 | -0.97 | 0.14  | 0.17  | -0.35 | 0.35  | 0.00  | 0.26  | 0.38  | -0.44 | 1.03  | 0.03  | -0.05 | 0.68  | 0.28  | 0.16  | 0.27  | -0.21 | -0.15 | 0.32  | 0.11  | 0.3393  |
| Organelle Lumen                                             | -0.79 | -0.43 | -0.45 | -0.34 | -0.97 | 0.14  | 0.17  | -0.35 | 0.35  | 0.00  | 0.26  | 0.38  | -0.44 | 1.03  | 0.03  | -0.05 | 0.68  | 0.28  | 0.16  | 0.27  | -0.21 | -0.15 | 0.32  | 0.11  | 0.3393  |
| Regulation Of Transcription From Rna Polymerase Ii Promoter | -0.24 | -0.35 | -0.42 | 0.28  | -0.75 | 0.24  | 0.10  | -0.54 | 0.05  | -0.19 | -0.16 | -0.10 | -0.11 | -0.30 | 0.32  | 0.14  | 0.75  | 0.15  | 0.35  | -0.22 | 0.22  | 0.28  | 0.16  | 0.34  | 0.34668 |
| Endoplasmic Reticulum                                       | 0.17  | -0.49 | -0.22 | -1.02 | -0.96 | -0.07 | 0.91  | 0.16  | 0.25  | -0.20 | 0.27  | -0.94 | 0.28  | -0.24 | 0.73  | 0.02  | 0.01  | 0.45  | 0.72  | 0.84  | 0.46  | -0.16 | -0.04 | -0.93 | 0.35629 |
| Hemostasis                                                  | -0.47 | -0.33 | -0.21 | -0.71 | -0.81 | -0.32 | 0.37  | -0.77 | 0.38  | -0.51 | 0.65  | 0.31  | -0.01 | 0.50  | -0.17 | 0.47  | 0.42  | 0.39  | 0.22  | 0.38  | -0.06 | 0.09  | -0.14 | 0.32  | 0.40191 |
| Positive Regulation Of Cytokine Biosynthetic Process        | -0.15 | 0.04  | 0.44  | -2.41 | -0.14 | -0.30 | 0.69  | 0.33  | 0.22  | -0.08 | -0.18 | -1.01 | 0.31  | 0.79  | 1.16  | 0.64  | 0.06  | 0.35  | -0.07 | 0.35  | 0.32  | -0.72 | -0.49 | -0.15 | 0.42684 |
| Biosynthetic Process                                        | -0.32 | 0.08  | 0.45  | -2.98 | -0.27 | -0.47 | 1.08  | 0.78  | 0.56  | -0.40 | -0.10 | -1.17 | 0.04  | 0.87  | 1.26  | 0.51  | 0.02  | 0.49  | 0.25  | 0.59  | 0.32  | -0.30 | -0.83 | -0.44 | 0.46179 |
| Endosome                                                    | 0.11  | -0.10 | -0.60 | -0.43 | -0.56 | -1.20 | 0.31  | -0.80 | 0.47  | -0.41 | 0.29  | 0.09  | 0.19  | 0.07  | 0.10  | 0.07  | 0.04  | 0.37  | 0.49  | 0.38  | 0.25  | 0.04  | 0.19  | 0.63  | 0.47103 |
| External Side Of Plasma Membrane                            | 0.14  | -0.17 | -0.55 | -0.85 | -0.76 | -1.01 | 0.41  | -0.59 | 0.60  | -0.72 | 0.40  | -0.23 | 0.29  | 0.08  | 0.44  | -0.04 | 0.09  | 0.51  | 0.49  | 0.86  | 0.41  | 0.15  | -0.03 | 0.10  | 0.55669 |
| Humoral Immune Response                                     | 0.26  | -0.16 | 0.06  | -1.20 | -0.60 | 0.01  | 0.08  | -0.66 | 0.38  | -1.32 | 0.22  | -0.45 | 0.57  | 0.63  | 0.65  | 0.46  | 0.29  | 0.04  | 0.23  | 0.88  | 0.28  | 0.04  | 0.00  | -0.66 | 0.56709 |
| Cytoskeleton                                                | -0.78 | -0.55 | -0.48 | 0.14  | -0.81 | -0.19 | -0.05 | -0.52 | 0.06  | -0.43 | 0.15  | -0.04 | 0.20  | 0.24  | 0.29  | 0.26  | 0.43  | 0.22  | 0.37  | 0.30  | 0.24  | 0.36  | 0.33  | 0.27  | 0.58333 |
| Immunological Synapse                                       | -0.19 | -0.33 | -0.80 | -0.20 | -0.92 | -1.14 | 0.30  | -0.80 | 0.38  | -0.24 | 0.19  | 0.14  | 0.34  | 0.20  | 0.29  | -0.01 | 0.15  | 0.36  | 0.41  | 0.38  | 0.34  | 0.22  | 0.30  | 0.62  | 0.6005  |

|                                               |       |       |       |       |       |       |       |       |       |       |       |       |       |       |      |      |       |      |       |      |      |       |       |       |         |
|-----------------------------------------------|-------|-------|-------|-------|-------|-------|-------|-------|-------|-------|-------|-------|-------|-------|------|------|-------|------|-------|------|------|-------|-------|-------|---------|
| Positive Regulation Of Catalytic Activity     | -0.51 | -0.31 | -0.09 | -1.19 | -0.58 | -0.06 | 0.21  | -0.55 | 0.15  | -0.52 | 0.12  | -0.30 | 0.17  | -0.10 | 0.57 | 0.48 | 0.49  | 0.44 | 0.21  | 0.58 | 0.51 | 0.28  | 0.12  | -0.12 | 0.60481 |
| Lipid Raft                                    | -0.13 | 0.07  | -0.50 | -0.71 | -0.92 | -1.19 | 0.39  | -0.73 | 0.42  | -0.81 | 0.21  | -0.17 | 0.49  | 0.06  | 0.36 | 0.19 | 0.11  | 0.42 | 0.54  | 0.73 | 0.48 | 0.14  | 0.24  | 0.30  | 0.6789  |
| Transcription From Rna Polymerase Ii Promoter | -0.29 | -0.65 | -0.36 | -0.41 | -0.16 | 0.01  | -0.34 | -1.62 | -0.58 | 0.43  | -0.02 | -0.11 | 0.29  | -0.51 | 0.15 | 0.23 | 0.76  | 0.81 | -0.14 | 0.17 | 0.35 | 0.33  | 0.46  | 1.19  | 0.68306 |
| Regulation Of Transferase Activity            | -0.58 | -0.40 | -0.25 | -0.37 | -0.76 | -0.02 | -0.21 | -0.65 | -0.12 | -0.70 | -0.04 | -0.11 | 0.05  | -0.07 | 0.44 | 0.41 | 0.53  | 0.51 | 0.48  | 0.47 | 0.54 | 0.44  | 0.10  | 0.29  | 0.69927 |
| Anatomical Structure Development              | -0.43 | -0.53 | -0.96 | -0.25 | -1.57 | -1.17 | 0.44  | -0.25 | 0.63  | -0.47 | 0.51  | -0.27 | 0.32  | 0.53  | 0.53 | 0.04 | 0.33  | 0.54 | 0.42  | 0.29 | 0.32 | 0.47  | 0.00  | 0.52  | 0.71939 |
| Intracellular Organelle Part                  | -0.91 | -0.60 | -0.52 | -1.08 | -1.17 | -0.02 | 0.37  | -0.89 | 0.66  | -0.90 | 0.51  | 0.01  | -0.14 | 0.96  | 0.55 | 0.05 | 0.60  | 0.30 | 0.45  | 0.66 | 0.17 | 0.22  | 0.56  | 0.16  | 0.75524 |
| Intracellular Non Membrane Bound Organelle    | -0.73 | -0.60 | -0.56 | -0.64 | -1.15 | -0.10 | 0.26  | -0.77 | 0.42  | -0.88 | 0.41  | -0.21 | 0.17  | 0.40  | 0.46 | 0.30 | 0.72  | 0.21 | 0.48  | 0.46 | 0.31 | 0.38  | 0.53  | 0.14  | 0.75925 |
| Non Membrane Bound Organelle                  | -0.73 | -0.60 | -0.56 | -0.64 | -1.15 | -0.10 | 0.26  | -0.77 | 0.42  | -0.88 | 0.41  | -0.21 | 0.17  | 0.40  | 0.46 | 0.30 | 0.72  | 0.21 | 0.48  | 0.46 | 0.31 | 0.38  | 0.53  | 0.14  | 0.75925 |
| Organelle Part                                | -0.87 | -0.57 | -0.50 | -1.13 | -1.16 | 0.00  | 0.34  | -0.90 | 0.65  | -0.97 | 0.46  | -0.01 | -0.13 | 0.95  | 0.56 | 0.10 | 0.59  | 0.35 | 0.47  | 0.66 | 0.16 | 0.21  | 0.56  | 0.17  | 0.7769  |
| Positive Regulation Of Cell Differentiation   | -0.37 | -0.18 | -0.67 | -0.59 | -1.21 | 0.18  | 0.53  | -0.76 | 0.75  | -2.72 | 0.42  | -0.24 | 0.41  | 0.47  | 0.38 | 0.36 | 0.46  | 0.54 | 0.29  | 0.79 | 0.67 | 0.29  | 0.11  | 0.09  | 0.81013 |
| Lymphocyte Differentiation                    | -0.11 | 0.07  | -0.26 | -1.18 | -1.05 | 0.16  | 0.64  | -0.59 | 0.77  | -3.31 | 0.28  | -0.34 | 0.34  | 0.45  | 0.62 | 0.20 | 0.67  | 0.61 | 0.32  | 0.90 | 0.71 | 0.21  | 0.02  | -0.13 | 0.81863 |
| Regulation Of Cell Proliferation              | -0.95 | -0.61 | -0.85 | -0.04 | -0.99 | 0.03  | -0.26 | -0.38 | 0.20  | -0.25 | -0.73 | -0.13 | 0.04  | 0.06  | 0.42 | 0.51 | 0.92  | 0.54 | 0.82  | 0.05 | 0.23 | 0.30  | 0.60  | 0.48  | 0.82664 |
| Cytokine Activity                             | -0.19 | -0.31 | -0.19 | -0.92 | -0.99 | -0.33 | 0.38  | -1.63 | 0.83  | -1.43 | 0.61  | -1.00 | -0.25 | 0.94  | 0.96 | 0.84 | 0.64  | 0.80 | 0.87  | 1.12 | 0.25 | -0.19 | 0.06  | -0.88 | 0.85942 |
| Immune System Development                     | -0.44 | -0.22 | -0.16 | -0.95 | -1.72 | -0.80 | 0.61  | -0.94 | 0.49  | -1.90 | 0.60  | -0.12 | 0.14  | 0.52  | 0.79 | 0.43 | 0.86  | 0.51 | 0.36  | 0.73 | 0.35 | 0.17  | 0.44  | 0.26  | 0.92638 |
| Positive Regulation Of Immune System Process  | -0.22 | -0.27 | -0.53 | -1.31 | -1.25 | 0.18  | 0.79  | -0.84 | 0.81  | -2.84 | 0.38  | -0.61 | 0.63  | 0.63  | 0.58 | 0.25 | 0.60  | 0.59 | 0.35  | 0.87 | 0.74 | 0.44  | 0.01  | 0.03  | 0.95338 |
| Cellular Cation Homeostasis                   | -1.32 | -1.37 | -1.60 | -0.28 | -1.83 | -1.15 | 2.03  | -0.64 | 0.26  | -0.77 | 1.27  | -0.47 | 0.94  | 0.58  | 0.40 | 0.39 | -0.24 | 0.33 | -0.27 | 1.07 | 1.03 | 0.60  | 0.63  | 0.41  | 0.9793  |
| Receptor Signaling Protein Activity           | -1.02 | -0.70 | -0.74 | -0.49 | -1.59 | -0.74 | 0.51  | -1.10 | 0.71  | -1.10 | 0.77  | -0.42 | 0.14  | 1.09  | 0.76 | 0.72 | 0.71  | 0.57 | 0.37  | 0.88 | 0.42 | 0.40  | 0.13  | -0.28 | 0.98398 |
| Receptor Binding                              | -0.50 | -0.65 | -0.35 | -0.57 | -1.25 | -0.56 | 0.32  | -1.52 | 0.66  | -1.76 | 0.45  | -0.85 | -0.15 | 0.93  | 1.00 | 1.12 | 0.97  | 0.87 | 1.05  | 1.05 | 0.08 | 0.22  | 0.20  | -0.74 | 1.10002 |
| Hemopoiesis                                   | -0.46 | -0.20 | -0.48 | -1.19 | -1.94 | -0.41 | 0.89  | -1.11 | 0.92  | -3.33 | 0.73  | -0.32 | 0.39  | 0.67  | 0.80 | 0.50 | 0.94  | 0.75 | 0.40  | 1.00 | 0.70 | 0.27  | 0.30  | 0.19  | 1.15044 |
| Positive Regulation Of Translation            | -0.30 | -0.44 | 0.29  | -1.79 | -0.10 | -0.16 | -0.06 | -1.32 | -0.11 | -1.88 | -0.27 | -1.69 | 0.12  | 1.83  | 1.41 | 1.27 | 1.29  | 0.91 | 1.04  | 1.22 | 0.07 | -0.05 | -0.44 | -0.83 | 1.30493 |
| Multi Organism Process                        | -0.04 | -0.41 | 0.09  | -1.85 | -1.19 | 0.06  | 0.81  | -1.92 | 0.54  | -2.99 | 0.50  | -1.59 | -0.10 | 1.07  | 1.36 | 1.36 | 1.24  | 1.03 | 0.87  | 1.47 | 0.22 | -0.16 | 0.53  | -0.91 | 1.33227 |
| Positive Regulation Of Cell Proliferation     | -0.38 | -0.16 | -0.11 | -1.82 | -1.14 | 0.12  | 0.29  | -1.86 | 0.34  | -3.88 | -0.06 | -1.18 | 0.19  | 1.52  | 1.34 | 1.04 | 1.63  | 1.03 | 0.99  | 1.41 | 0.57 | 0.43  | 0.06  | -0.38 | 1.64253 |
| Cell Activation                               | -0.67 | -0.70 | -1.00 | -1.32 | -2.17 | -0.43 | 0.47  | -2.02 | 0.47  | -3.38 | 0.08  | -0.73 | 0.51  | 1.17  | 1.07 | 0.72 | 1.33  | 1.16 | 1.04  | 1.37 | 1.05 | 0.94  | 0.58  | 0.45  | 1.90093 |
| Immune Response                               | -1.55 | -0.97 | -0.79 | -3.10 | -2.34 | -1.40 | 1.43  | -2.03 | 1.30  | -2.46 | 1.41  | -1.00 | 1.00  | 1.12  | 1.63 | 0.94 | 0.77  | 1.11 | 1.16  | 1.94 | 1.49 | 0.46  | 0.16  | -0.28 | 1.91589 |
| Immune System Process                         | -1.71 | -1.13 | -0.85 | -2.59 | -2.60 | -1.78 | 1.15  | -1.93 | 1.06  | -2.26 | 1.39  | -1.00 | 1.22  | 1.36  | 1.39 | 0.97 | 0.91  | 0.97 | 1.11  | 1.95 | 1.55 | 0.70  | 0.21  | -0.10 | 2.03978 |

Table E4

| <b>mRNA name</b> | <b>probe.ID</b> |
|------------------|-----------------|
| CXCL2            | M57731          |
| IL6              | NM_000600       |
| IL1B             | NM_000576       |
| IL8              | NM_000584       |
| CCL7             | NM_006273       |
| PLAUR            | U08839          |
| PTGS2            | NM_000963       |
| CCL3             | NM_002983       |
| CCL20            | NM_004591       |
| TLR2             | NM_003264       |
| PPBP             | R64130          |
| ITGAX            | M81695          |
| TNFAIP6          | NM_007115       |
| ICAM1            | NM_000201       |
| NLRP3            | NM_004895       |
| S100A9           | NM_002965       |
| IL1R1            | NM_000877       |
| FCER1G           | NM_004106       |
| FCGR2A           | NM_021642       |
| NT5E             | NM_002526       |
| CRADD            | U79115          |
| HAVCR2           | AW025572        |
| LGALS3           | BC001120        |
| CCL4             | NM_002984       |
| CEBPB            | AL564683        |
| CLEC7A           | AF313468        |
| CCRL2            | AF015524        |
| GP1BB            | NM_000407       |
| ADA              | NM_000022       |
| FCGR2A           | NM_021642       |
| TLR4             | U93091          |
| TNFAIP6          | NM_007115       |
| ITGA2B           | NM_000419       |
| TNFRSF1B         | NM_001066       |

Table E5

| Diseases or Functions Annotation    | -log p-Value | Predicted Activation State | Activation z-score | z- # Molecules | Molecules                                                                                                    | Categories                                                                                                     |
|-------------------------------------|--------------|----------------------------|--------------------|----------------|--------------------------------------------------------------------------------------------------------------|----------------------------------------------------------------------------------------------------------------|
| <b>Binding of blood cells</b>       | 24.63827216  | Decreased                  | -4.148             | 18             | CCL20,CCL3,CCL4,CXCL2,CXCL8,FCGR2A,ICAM1,IL1B,IL6,ITGA2B,ITGAX,LGALS3,NT5E,PLAUR,PPBP,S100A9,TLR2,TLR4       | Cell-To-Cell Signaling and Interaction                                                                         |
| <b>Binding of leukocytes</b>        | 24.15366289  | Decreased                  | -4.033             | 17             | CCL20,CCL3,CCL4,CXCL2,CXCL8,FCGR2A,ICAM1,IL1B,IL6,ITGAX,LGALS3,NT5E,PLAUR,PPBP,S100A9,TLR2,TLR4              | Cell-To-Cell Signaling and Interaction, Hematological System Development and Function                          |
| <b>Adhesion of blood cells</b>      | 23.93181414  | Decreased                  | -3.884             | 17             | CCL20,CCL4,CXCL2,CXCL8,FCGR2A,ICAM1,IL1B,IL6,ITGA2B,ITGAX,LGALS3,NT5E,PLAUR,PPBP,S100A9,TLR2,TLR4            | Cell-To-Cell Signaling and Interaction                                                                         |
| <b>Inflammatory response</b>        | 23.7721133   | Decreased                  | -2.75              | 19             | CCL20,CCL3,CCL4,CCL7,CEBPB,CXCL2,CXCL8,IL1B,IL1R1,IL6,LGALS3,NLRP3,PLAUR,PPBP,PTGS2,S100A9,TLR2,TLR4,TNFAIP6 | Inflammatory Response                                                                                          |
| <b>Adhesion of immune cells</b>     | 23.08460016  | Decreased                  | -3.766             | 16             | CCL20,CCL4,CXCL2,CXCL8,FCGR2A,ICAM1,IL1B,IL6,ITGAX,LGALS3,NT5E,PLAUR,PPBP,S100A9,TLR2,TLR4                   | Cell-To-Cell Signaling and Interaction, Hematological System Development and Function, Immune Cell Trafficking |
| <b>Cell movement of blood cells</b> | 21.46852108  | Decreased                  | -3.411             | 18             | CCL20,CCL3,CCL4,CCL7,CXCL2,CXCL8,FCGR2A,ICAM1,IL1B,IL6,ITGAX,LGALS3,PLAUR,PPBP,S100A9,TLR2,TLR4,TNFRSF1B     | Cellular Movement                                                                                              |

|                                    |             |           |        |    |                                                                                                           |                                                                                                                                       |
|------------------------------------|-------------|-----------|--------|----|-----------------------------------------------------------------------------------------------------------|---------------------------------------------------------------------------------------------------------------------------------------|
| <b>Activation of cells</b>         | 20.83268267 | Decreased | -3.352 | 18 | ADA,CCL3,CCL7,CEBPB,CLEC7A,CXCL8,FCER1G,FCGR2A,HAVCR2,ICAM1,IL1B,IL1R1,IL6,LGALS3,NT5E,TLR2,TLR4,TNFRSF1B | Cell-To-Cell Signaling and Interaction                                                                                                |
| <b>Cell movement of leukocytes</b> | 20.42945706 | Decreased | -3.232 | 17 | CCL20,CCL3,CCL4,CCL7,CXCL2,CXCL8,ICAM1,IL1B,IL6,ITGAX,LGALS3,PLAUR,PPBP,S100A9,TLR2,TLR4,TNFRSF1B         | Cellular Movement, Hematological System Development and Function, Immune Cell Trafficking                                             |
| Activation of leukocytes           | 18.95860731 | Decreased | -2.682 | 15 | ADA,CCL3,CCL7,CLEC7A,CXCL8,FCER1G,FCGR2A,HAVCR2,IL1B,IL6,LGALS3,NT5E,TLR2,TLR4,TNFRSF1B                   | Cell-To-Cell Signaling and Interaction, Hematological System Development and Function, Immune Cell Trafficking, Inflammatory Response |
| Chemotaxis of leukocytes           | 18.30891851 | Decreased | -2.372 | 14 | CCL20,CCL3,CCL4,CCL7,CXCL2,CXCL8,IL1B,IL6,LGALS3,PLAUR,PPBP,S100A9,TLR2,TLR4                              | Cellular Movement, Hematological System Development and Function, Immune Cell Trafficking, Inflammatory Response                      |
| Binding of myeloid cells           | 18.07007044 | Decreased | -3.382 | 12 | CCL3,CXCL2,CXCL8,FCGR2A,ICAM1,IL1B,ITGAX,LGALS3,PLAUR,PPBP,S100A9,TLR2                                    | Cell-To-Cell Signaling and Interaction                                                                                                |
| Cell movement of myeloid cells     | 17.86327943 | Decreased | -3.162 | 14 | CCL20,CCL3,CCL4,CCL7,CXCL2,CXCL8,ICAM1,IL1B,ITGAX,LGALS3,PLAUR,PPBP,S100A9,TLR4                           | Cellular Movement                                                                                                                     |
| Cell movement of phagocytes        | 17.86327943 | Decreased | -2.947 | 14 | CCL20,CCL3,CCL4,CCL7,CXCL2,CXCL8,ICAM1,IL1B,ITGAX,LGALS3,PLAUR,PPBP,S100A9,TLR4                           | Cellular Movement, Hematological System Development and Function, Immune Cell Trafficking, Inflammatory Response                      |

|                                          |             |           |        |    |                                                                                    |                                                                                                                  |
|------------------------------------------|-------------|-----------|--------|----|------------------------------------------------------------------------------------|------------------------------------------------------------------------------------------------------------------|
| Cell movement of granulocytes            | 16.84771166 | Decreased | -2.972 | 12 | CCL3,CCL4,CCL7,CXCL2,CXCL8,ICAM1,IL1B,LGALS3,PLAUR,PPBP,S100A9,TLR4                | Cellular Movement, Hematological System Development and Function, Immune Cell Trafficking                        |
| Binding of professional phagocytic cells | 16.66554625 | Decreased | -3.248 | 11 | CCL3,CXCL2,CXCL8,FCGR2A,ICAM1,IL1B,ITGAX,PLAUR,PPBP,S100A9,TLR2                    | Cell-To-Cell Signaling and Interaction, Hematological System Development and Function, Inflammatory Response     |
| Chemotaxis                               | 16.43415218 | Decreased | -2.893 | 15 | CCL20,CCL3,CCL4,CCL7,CXCL2,CXCL8,IL1B,IL6,LGALS3,PLAUR,PPBP,PTGS2,S100A9,TLR2,TLR4 | Cellular Movement                                                                                                |
| Cell movement of neutrophils             | 16.4134127  | Decreased | -2.634 | 11 | CCL3,CCL4,CCL7,CXCL2,CXCL8,ICAM1,IL1B,LGALS3,PPBP,S100A9,TLR4                      | Cellular Movement, Hematological System Development and Function, Immune Cell Trafficking, Inflammatory Response |
| Chemotaxis of phagocytes                 | 16.37778598 | Decreased | -2.509 | 12 | CCL20,CCL3,CCL4,CCL7,CXCL2,CXCL8,IL1B,LGALS3,PLAUR,PPBP,S100A9,TLR4                | Cellular Movement, Hematological System Development and Function, Immune Cell Trafficking, Inflammatory Response |
| Binding of granulocytes                  | 16.28316228 | Decreased | -3.092 | 10 | CXCL2,CXCL8,FCGR2A,ICAM1,IL1B,LGALS3,PLAUR,PPBP,S100A9,TLR2                        | Cell-To-Cell Signaling and Interaction, Hematological System Development and Function, Immune Cell Trafficking   |

|                                         |             |           |        |    |                                                                                                                                   |                                                                                                                                       |
|-----------------------------------------|-------------|-----------|--------|----|-----------------------------------------------------------------------------------------------------------------------------------|---------------------------------------------------------------------------------------------------------------------------------------|
| Binding of neutrophils                  | 16.05207638 | Decreased | -2.931 | 9  | CXCL2,CXCL8,FCGR2A,ICAM1,IL1B,PLAUR,PPBP,S100A9,TLR2                                                                              | Cell-To-Cell Signaling and Interaction, Hematological System Development and Function, Immune Cell Trafficking, Inflammatory Response |
| Adhesion of myeloid cells               | 15.80410035 | Decreased | -3.086 | 10 | CXCL2,CXCL8,ICAM1,IL1B,ITGAX,LGALS3,PLAUR,PPBP,S100A9,TLR2                                                                        | Cell-To-Cell Signaling and Interaction                                                                                                |
| Cell movement of mononuclear leukocytes | 15.80134291 | Decreased | -2.735 | 13 | CCL20,CCL3,CCL4,CCL7,CXCL8,ICAM1,IL1B,ITGAX,LGALS3,PLAUR,TLR2,TLR4,TNFRSF1B                                                       | Cellular Movement, Hematological System Development and Function, Immune Cell Trafficking                                             |
| Adhesion of granulocytes                | 15.11918641 | Decreased | -2.939 | 9  | CXCL2,CXCL8,ICAM1,IL1B,LGALS3,PLAUR,PPBP,S100A9,TLR2                                                                              | Cell-To-Cell Signaling and Interaction, Hematological System Development and Function, Immune Cell Trafficking                        |
| Cell movement                           | 14.92445304 | Decreased | -4.331 | 22 | CCL20,CCL3,CCL4,CCL7,CCRL2,CEBPB,CXCL2,CXCL8,FCGR2A,HAVCR2,ICAM1,IL1B,IL6,ITGAX,LGALS3,PLAUR,PPBP,PTGS2,S100A9,TLR2,TLR4,TNFRSF1B | Cellular Movement                                                                                                                     |
| Migration of cells                      | 14.77728353 | Decreased | -4.159 | 21 | CCL20,CCL3,CCL4,CCL7,CCRL2,CEBPB,CXCL2,CXCL8,HAVCR2,ICAM1,IL1B,IL6,ITGAX,LGALS3,PLAUR,PPBP,PTGS2,S100A9,TLR2,TLR4,TNFRSF1B        | Cellular Movement                                                                                                                     |

|                                              |             |           |        |    |                                                                                |                                                                                                                                       |
|----------------------------------------------|-------------|-----------|--------|----|--------------------------------------------------------------------------------|---------------------------------------------------------------------------------------------------------------------------------------|
| Adhesion of phagocytes                       | 14.58502665 | Decreased | -2.94  | 9  | CXCL2,CXCL8,ICAM1,IL1B,ITGAX,PLAUR,PPBP,S100A9,TLR2                            | Cell-To-Cell Signaling and Interaction, Hematological System Development and Function, Immune Cell Trafficking, Inflammatory Response |
| Adhesion of neutrophils                      | 14.54363397 | Decreased | -2.772 | 8  | CXCL2,CXCL8,ICAM1,IL1B,PLAUR,PPBP,S100A9,TLR2                                  | Cell-To-Cell Signaling and Interaction, Hematological System Development and Function, Immune Cell Trafficking, Inflammatory Response |
| Chemotaxis of myeloid cells                  | 14.50031292 | Decreased | -2.489 | 11 | CCL3,CCL4,CCL7,CXCL2,CXCL8,IL1B,LGALS3,PLAUR,PPBP,S100A9,TLR4                  | Cellular Movement                                                                                                                     |
| Binding of tumor cell lines                  | 14.34294415 | Decreased | -3.058 | 14 | CCL3,CCL4,CXCL2,CXCL8,FCGR2A,GP1BB,ICAM1,IL1B,IL6,ITGAX,LGALS3,PLAUR,TLR2,TLR4 | Cell-To-Cell Signaling and Interaction                                                                                                |
| Interaction of mononuclear leukocytes        | 13.95467702 | Decreased | -3.122 | 10 | CCL20,CCL3,CCL4,ICAM1,IL6,ITGAX,NT5E,PLAUR,TLR2,TLR4                           | Cell-To-Cell Signaling and Interaction, Hematological System Development and Function                                                 |
| Cell movement of peripheral blood leukocytes | 13.42945706 | Decreased | -2.016 | 8  | CCL20,CCL3,CCL4,CCL7,CXCL8,ICAM1,PLAUR,TLR2                                    | Cellular Movement, Hematological System Development and Function, Immune Cell Trafficking                                             |
| Chemotaxis of granulocytes                   | 12.90657831 | Decreased | -2.263 | 9  | CCL3,CCL7,CXCL2,CXCL8,LGALS3,PLAUR,PPBP,S100A9,TLR4                            | Cellular Movement, Hematological System Development and Function, Immune Cell Trafficking, Inflammatory Response                      |



|                                   |             |           |        |    |                                                         |                                                                                                                                       |
|-----------------------------------|-------------|-----------|--------|----|---------------------------------------------------------|---------------------------------------------------------------------------------------------------------------------------------------|
| Binding of endothelial cells      | 12.74472749 | Decreased | -3.037 | 10 | CCL3,CCL4,CXCL2,CXCL8,ICAM1,IL1B,LGALS3,NT5E,PLAUR,PPBP | Cardiovascular System Development and Function, Cell-To-Cell Signaling and Interaction                                                |
| Activation of phagocytes          | 12.69680394 | Decreased | -2.448 | 9  | CCL3,CCL7,CXCL8,HAVCR2,IL1B,IL6,TLR2,TLR4,TNFRSF1B      | Cell-To-Cell Signaling and Interaction, Hematological System Development and Function, Immune Cell Trafficking, Inflammatory Response |
| Cell movement of monocytes        | 12.59687948 | Decreased | -2.586 | 9  | CCL20,CCL3,CCL4,CCL7,CXCL8,IL1B,ITGAX,LGALS3,PLAUR      | Cellular Movement, Hematological System Development and Function, Immune Cell Trafficking, Inflammatory Response                      |
| Migration of phagocytes           | 12.3419886  | Decreased | -2.484 | 9  | CCL20,CCL3,CCL4,CCL7,CXCL8,ICAM1,IL1B,ITGAX,LGALS3      | Cellular Movement, Hematological System Development and Function, Immune Cell Trafficking, Inflammatory Response                      |
| Binding of mononuclear leukocytes | 12.28066871 | Decreased | -2.958 | 9  | CCL20,CCL3,CCL4,ICAM1,IL6,ITGAX,NT5E,PLAUR,TLR4         | Cell-To-Cell Signaling and Interaction, Hematological System Development and Function                                                 |
| Adhesion of endothelial cells     | 12.25026368 | Decreased | -2.931 | 9  | CCL3,CCL4,CXCL2,CXCL8,ICAM1,IL1B,LGALS3,PLAUR,PPBP      | Cardiovascular System Development and Function, Cell-To-Cell Signaling and Interaction                                                |

|                                        |             |           |        |    |                                                                                              |                                                                                                                                       |
|----------------------------------------|-------------|-----------|--------|----|----------------------------------------------------------------------------------------------|---------------------------------------------------------------------------------------------------------------------------------------|
| Migration of mononuclear leukocytes    | 12.21609642 | Decreased | -2.955 | 10 | CCL20,CCL3,CCL4,CCL7,CXCL8,ICAM1,ITGAX, LGALS3,TLR4,TNFRSF1B                                 | Cellular Movement, Hematological System Development and Function, Immune Cell Trafficking                                             |
| Quantity of ca2+                       | 11.4867824  | Decreased | -2.915 | 10 | CCL3,CCL4,CCL7,CXCL8,FCGR2A,IL1B,IL6,PLAUR,PPBP,S100A9                                       | Cell Signaling, Molecular Transport, Vitamin and Mineral Metabolism                                                                   |
| Adhesion of tumor cell lines           | 11.27736608 | Decreased | -2.679 | 11 | CCL3,CCL4,CXCL2,CXCL8,GP1BB,ICAM1,IL6,ITGAX, LGALS3,PLAUR,TLR2                               | Cell-To-Cell Signaling and Interaction                                                                                                |
| Cell movement of tumor cell lines      | 10.838632   | Decreased | -3.721 | 16 | CCL20,CCL3,CCL4,CCL7,CEBPB,CXCL2,CXCL8, HAVCR2,IL1B,IL6, LGALS3,PLAUR,PTGS2,S100A9,TLR2,TLR4 | Cellular Movement                                                                                                                     |
| Synthesis of reactive oxygen species   | 10.56703071 | Decreased | -3.057 | 10 | CLEC7A,CXCL8,FCGR2A,IL1B,IL6,ITGAX,PLAUR,PTGS2,TLR2,TLR4                                     | Free Radical Scavenging                                                                                                               |
| Chemotaxis of monocytes                | 10.33068312 | Decreased | -2.195 | 7  | CCL3,CCL4,CCL7,CXCL8,IL1B, LGALS3,PLAUR                                                      | Cellular Movement, Hematological System Development and Function, Immune Cell Trafficking, Inflammatory Response                      |
| Activation of antigen presenting cells | 10.2541448  | Decreased | -2.007 | 7  | CCL3, HAVCR2,IL1B,IL6,TLR2,TLR4,TNFRSF1B                                                     | Cell-To-Cell Signaling and Interaction, Hematological System Development and Function, Immune Cell Trafficking, Inflammatory Response |

|                                    |             |           |        |    |                                                                                  |                                                                                                                      |
|------------------------------------|-------------|-----------|--------|----|----------------------------------------------------------------------------------|----------------------------------------------------------------------------------------------------------------------|
| Cell movement of eosinophils       | 10.09258864 | Decreased | -2.207 | 6  | CCL3,CCL7,CXCL8,IL1B,LGALS3,PLAUR                                                | Cellular Movement, Hematological System Development and Function, Hypersensitivity Response, Immune Cell Trafficking |
| Immune response of cells           | 10.03952922 | Decreased | -2.751 | 10 | CLEC7A,CXCL8,FCER1G,FCGR2A,IL1B,IL6,LGALS3,S100A9,TLR2,TLR4                      | Inflammatory Response                                                                                                |
| Adhesion of mononuclear leukocytes | 9.863279433 | Decreased | -2.608 | 7  | CCL20,CCL4,ICAM1,IL6,ITGAX,PLAUR,TLR4                                            | Cell-To-Cell Signaling and Interaction, Hematological System Development and Function, Immune Cell Trafficking       |
| Activation of myeloid cells        | 9.795880017 | Decreased | -2.381 | 7  | CCL3,CCL7,CXCL8,FCGR2A,IL1B,TLR2,TLR4                                            | Cell-To-Cell Signaling and Interaction, Hematological System Development and Function                                |
| Mobilization of ca <sup>2+</sup>   | 9.752026734 | Decreased | -2.518 | 9  | CCL3,CCL4,CCL7,CXCL8,FCER1G,FCGR2A,LGALS3,PLAUR,TLR2                             | Cell Signaling, Molecular Transport, Vitamin and Mineral Metabolism                                                  |
| Migration of tumor cell lines      | 9.588380294 | Decreased | -3.507 | 14 | CCL20,CCL7,CEBPB,CXCL2,CXCL8,HAVCR2,IL1B,IL6,LGALS3,PLAUR,PTGS2,S100A9,TLR2,TLR4 | Cellular Movement                                                                                                    |
| Interaction of lymphocytes         | 9.458420756 | Decreased | -2.607 | 7  | CCL20,CCL4,ICAM1,IL6,NT5E,TLR2,TLR4                                              | Cell-To-Cell Signaling and Interaction, Hematological System Development and Function                                |

|                                          |             |           |        |   |                                                |                                                                                                                                                       |
|------------------------------------------|-------------|-----------|--------|---|------------------------------------------------|-------------------------------------------------------------------------------------------------------------------------------------------------------|
| Recruitment of leukocytes                | 9.446116973 | Decreased | -2.19  | 5 | CCL3,CCL7,CXCL8,IL1B,TNFRSF1B                  | Cell-To-Cell Signaling and Interaction, Cellular Movement, Hematological System Development and Function, Immune Cell Trafficking                     |
| Cell movement of carcinoma cell lines    | 9.412289035 | Decreased | -2.933 | 9 | CCL3,CCL4,CCL7,CEBPB,CXCL8,IL1B,IL6,PTGS2,TLR2 | Cellular Movement                                                                                                                                     |
| Migration of antigen presenting cells    | 9.388276692 | Decreased | -2.028 | 6 | CCL20,CCL3,CCL4,CCL7,IL1B,LGALS3               | Cellular Movement, Hematological System Development and Function, Immune Cell Trafficking                                                             |
| Migration of lymphatic system cells      | 9.364516253 | Decreased | -2.765 | 8 | CCL20,CCL3,CCL4,CXCL8,ICAM1,IL6,TLR4,TNFRSF1B  | Cellular Movement, Immune Cell Trafficking                                                                                                            |
| Cell viability of blood cells            | 9.289036881 | Decreased | -2.595 | 7 | CCL3,CXCL8,ICAM1,IL1B,IL6,PPBP,TLR4            | Cell Death and Survival                                                                                                                               |
| Migration of peripheral blood leukocytes | 9.083546051 | Decreased | -2.219 | 5 | CCL3,CCL4,CCL7,CXCL8,ICAM1                     | Cellular Movement, Hematological System Development and Function, Immune Cell Trafficking                                                             |
| Proliferation of smooth muscle cells     | 9.027334408 | Decreased | -2.586 | 7 | CCL3,CXCL8,IL1B,IL6,PLAUR,TLR2,TLR4            | Cellular Development, Cellular Growth and Proliferation, Organ Development, Skeletal and Muscular System Development and Function, Tissue Development |
| Production of reactive oxygen species    | 8.88941029  | Decreased | -2.736 | 8 | CLEC7A,CXCL8,FCGR2A,IL1B,ITGAX,PTGS2,TLR2,TLR4 | Free Radical Scavenging                                                                                                                               |
| Binding of leukemia cell lines           | 8.628932138 | Decreased | -2.087 | 7 | CCL3,CCL4,GP1BB,ICAM1,IL6,PLAUR,TLR2           | Cell-To-Cell Signaling and Interaction                                                                                                                |

|                                               |             |           |        |   |                                           |                                                                                                        |
|-----------------------------------------------|-------------|-----------|--------|---|-------------------------------------------|--------------------------------------------------------------------------------------------------------|
| Cell movement of smooth muscle cells          | 8.448550002 | Decreased | -2.383 | 6 | CCL3,CXCL2,IL1B,IL6,PLAUR,PTGS2           | Cellular Movement, Skeletal and Muscular System Development and Function                               |
| Migration of myeloid cells                    | 8.415668776 | Decreased | -2.193 | 6 | CCL3,CXCL8,ICAM1,IL1B,ITGAX,PLAUR         | Cellular Movement                                                                                      |
| Lymphocyte migration                          | 8.074172425 | Decreased | -2.604 | 7 | CCL20,CCL3,CCL4,CXCL8,ICAM1,TLR4,TNFRSF1B | Cellular Movement, Hematological System Development and Function, Immune Cell Trafficking              |
| Cell viability of leukocytes                  | 7.920818754 | Decreased | -2.425 | 6 | CXCL8,ICAM1,IL1B,IL6,PPBP,TLR4            | Cell Death and Survival                                                                                |
| Cell viability of myeloid cells               | 7.853871964 | Decreased | -2.224 | 5 | CXCL8,ICAM1,IL1B,PPBP,TLR4                | Cell Death and Survival, Hematological System Development and Function                                 |
| Migration of PBMCs                            | 7.850780887 | Decreased | -2     | 4 | CCL3,CCL4,CCL7,CXCL8                      | Cellular Movement, Hematological System Development and Function, Immune Cell Trafficking              |
| Adhesion of leukemia cell lines               | 7.841637508 | Decreased | -2.418 | 6 | CCL3,CCL4,GP1BB,ICAM1,PLAUR,TLR2          | Cell-To-Cell Signaling and Interaction                                                                 |
| Binding of lymphocytes                        | 7.841637508 | Decreased | -2.408 | 6 | CCL20,CCL4,ICAM1,IL6,NT5E,TLR4            | Cell-To-Cell Signaling and Interaction, Hematological System Development and Function                  |
| Flux of ca2+                                  | 7.815308569 | Decreased | -2.57  | 7 | CCL20,CCL3,CCL4,CCL7,CXCL8,PPBP,TLR2      | Cell Signaling, Cellular Function and Maintenance, Molecular Transport, Vitamin and Mineral Metabolism |
| Cell movement of vascular smooth muscle cells | 7.630784143 | Decreased | -2.236 | 5 | CCL3,IL1B,IL6,PLAUR,PTGS2                 | Cellular Movement, Skeletal and Muscular System Development and Function                               |

|                                               |             |           |        |    |                                                                          |                                                                                                                                                                                                       |
|-----------------------------------------------|-------------|-----------|--------|----|--------------------------------------------------------------------------|-------------------------------------------------------------------------------------------------------------------------------------------------------------------------------------------------------|
| Proliferation of vascular smooth muscle cells | 7.508638306 | Decreased | -2.236 | 5  | CXCL8,IL1B,PLAUR,TLR2,TLR4                                               | Cardiovascular System Development and Function, Cellular Development, Cellular Growth and Proliferation, Organ Development, Skeletal and Muscular System Development and Function, Tissue Development |
| Cellular homeostasis                          | 7.390405591 | Decreased | -3.041 | 12 | CCL20,CCL3,CCL4,CCL7,CXCL8,ICAM1,IL1B,IL6,NT5E,PPBP,S100A9,TLR2          | Cellular Function and Maintenance                                                                                                                                                                     |
| Binding of vascular endothelial cells         | 7.331614083 | Decreased | -2.411 | 6  | CXCL8,ICAM1,LGALS3,NT5E,PLAUR,PPBP                                       | Cardiovascular System Development and Function, Cell-To-Cell Signaling and Interaction                                                                                                                |
| Chemotaxis of tumor cell lines                | 7.331614083 | Decreased | -2.221 | 6  | CCL20,CCL3,CCL4,CCL7,CXCL8,PLAUR                                         | Cellular Movement                                                                                                                                                                                     |
| Migration of granulocytes                     | 7.211831629 | Decreased | -2.193 | 5  | CCL3,CXCL8,ICAM1,IL1B,PLAUR                                              | Cellular Movement, Hematological System Development and Function, Immune Cell Trafficking                                                                                                             |
| Migration of carcinoma cell lines             | 7.142667504 | Decreased | -2.6   | 7  | CCL7,CEBPB,CXCL8,IL1B,IL6,PTGS2,TLR2                                     | Cellular Movement                                                                                                                                                                                     |
| Cell movement of epithelial cell lines        | 7.130181792 | Decreased | -2.2   | 6  | CCL20,CCRL2,ICAM1,PLAUR,PTGS2,TLR2                                       | Cellular Movement, Hair and Skin Development and Function                                                                                                                                             |
| Cell viability                                | 7.106238238 | Decreased | -2.628 | 13 | CCL3,CEBPB,CXCL8,ICAM1,IL1B,IL6,LGALS3,PLAUR,PPBP,PTGS2,S100A9,TLR2,TLR4 | Cell Death and Survival                                                                                                                                                                               |
| Migration of smooth muscle cells              | 7.045757491 | Decreased | -2.169 | 5  | CXCL2,IL1B,IL6,PLAUR,PTGS2                                               | Cellular Movement, Skeletal and Muscular System Development and Function                                                                                                                              |

|                                           |             |           |        |   |                                                       |                                                                                                                                                                                      |
|-------------------------------------------|-------------|-----------|--------|---|-------------------------------------------------------|--------------------------------------------------------------------------------------------------------------------------------------------------------------------------------------|
| Binding of lymphoma cell lines            | 6.863279433 | Decreased | -2.194 | 5 | CXCL2,ICAM1,IL1B,IL6,ITGAX                            | Cell-To-Cell Signaling and Interaction                                                                                                                                               |
| Adhesion of vascular endothelial cells    | 6.301899454 | Decreased | -2.179 | 5 | CXCL8,ICAM1,LGALS3,PLAUR,PPBP                         | Cardiovascular System Development and Function, Cell-To-Cell Signaling and Interaction                                                                                               |
| Cell movement of t lymphocytes            | 6.109578981 | Decreased | -2.222 | 5 | CCL20,CCL3,CCL4,CXCL8,ICAM1                           | Cell-mediated Immune Response, Cellular Movement, Hematological System Development and Function, Immune Cell Trafficking                                                             |
| Migration of vascular smooth muscle cells | 5.991399828 | Decreased | -2     | 4 | IL1B,IL6,PLAUR,PTGS2                                  | Cellular Movement, Skeletal and Muscular System Development and Function                                                                                                             |
| Engulfment of cells                       | 5.452225295 | Decreased | -2.177 | 6 | CEBPB,CLEC7A,FCGR2A,IL1B,IL6,LGALS3                   | Cellular Function and Maintenance                                                                                                                                                    |
| Differentiation of mononuclear leukocytes | 4.716698771 | Decreased | -2.096 | 5 | CXCL8,IL1B,IL6,TLR2,TLR4                              | Cellular Development, Cellular Growth and Proliferation, Hematological System Development and Function, Hematopoiesis, Lymphoid Tissue Structure and Development, Tissue Development |
| Invasion of cells                         | 4.581698709 | Decreased | -2.897 | 9 | CEBPB,CXCL8,HAVCR2,IL1B,IL6,LGALS3,PLAUR,PTGS2,S100A9 | Cellular Movement                                                                                                                                                                    |
| Concentration of lipid                    | 4.278189385 | Decreased | -2.163 | 5 | CXCL8,FCER1G,IL1B,PPBP,PTGS2                          | Lipid Metabolism, Molecular Transport, Small Molecule Biochemistry                                                                                                                   |

|                              |             |           |        |   |                                                      |                   |
|------------------------------|-------------|-----------|--------|---|------------------------------------------------------|-------------------|
| Invasion of tumor cell lines | 4.014573526 | Decreased | -2.697 | 8 | CEBPB,CXCL8,HAVCR2,IL6,LGALS3,PLAUR,P<br>TGS2,S100A9 | Cellular Movement |
|------------------------------|-------------|-----------|--------|---|------------------------------------------------------|-------------------|



Table E6

| Ingenuity Canonical Pathways                                                        | <b>-log(p-value)</b> | <b>Ratio</b> | <b>z-score</b> | <b>Downregulated</b> | <b>No change</b> | <b>Upregulated</b> | <b>NO overlap with</b> | <b>Molecules</b>                                       |
|-------------------------------------------------------------------------------------|----------------------|--------------|----------------|----------------------|------------------|--------------------|------------------------|--------------------------------------------------------|
| <b>TREM1 Signaling</b>                                                              | 17                   | 0.143        | -3.162         | 10/70<br>(14%)       | 0/70<br>(0%)     | 0/70<br>(0%)       | 60/70<br>(86%)         | TLR2,CXCL8,TLR4,ICAM1,NLRP3,IL1B,IL6,CCL3,ITGAX,CCL7   |
| <b>Osteoarthritis Pathway</b>                                                       | 10.5                 | 0.0439       | -2.646         | 9/205<br>(4%)        | 0/205<br>(0%)    | 0/205<br>(0%)      | 196/205<br>(96%)       | TLR2,CXCL8,TLR4,S100A9,IL1B,CEBPB,PTGS2,IL1R1,TNFRSF1B |
| <b>Dendritic Cell Maturation</b>                                                    | 9.33                 | 0.0435       | -2.646         | 8/184<br>(4%)        | 0/184<br>(0%)    | 0/184<br>(0%)      | 176/184<br>(96%)       | TLR2,TLR4,ICAM1,FCGR2A,FCER1G,IL1B,IL6,TNFRSF1B        |
| <b>LXR/RXR Activation</b>                                                           | 9.05                 | 0.0579       | 2.646          | 7/121<br>(6%)        | 0/121<br>(0%)    | 0/121<br>(0%)      | 114/121<br>(94%)       | TLR4,IL1B,IL6,PTGS2,IL1R1,TNFRSF1B,CCL7                |
| <b>IL-6 Signaling</b>                                                               | 8.88                 | 0.0547       | -2.646         | 7/128<br>(5%)        | 0/128<br>(0%)    | 0/128<br>(0%)      | 121/128<br>(95%)       | CXCL8,TNFAIP6,IL1B,IL6,CEBPB,IL1R1,TNFRSF1B            |
| <b>Role of Pattern Recognition Receptors in Recognition of Bacteria and Viruses</b> | 8.81                 | 0.0534       | -2.236         | 7/131<br>(5%)        | 0/131<br>(0%)    | 0/131<br>(0%)      | 124/131<br>(95%)       | TLR2,CXCL8,TLR4,CLEC7A,NLRP3,IL1B,IL6                  |
| <b>Role of IL-17F in Allergic Inflammatory Airway Diseases</b>                      | 8.21                 | 0.122        | -2.236         | 5/41<br>(12%)        | 0/41<br>(0%)     | 0/41<br>(0%)       | 36/41<br>(88%)         | CXCL8,CCL4,IL1B,IL6,CCL7                               |
| <b>Inflammasome pathway</b>                                                         | 7.45                 | 0.19         | -2             | 4/21<br>(19%)        | 0/21<br>(0%)     | 0/21<br>(0%)       | 17/21<br>(81%)         | CXCL8,TLR4,NLRP3,IL1B                                  |
| <b>NF-κB Signaling</b>                                                              | 6.4                  | 0.0337       | -2.449         | 6/178<br>(3%)        | 0/178<br>(0%)    | 0/178<br>(0%)      | 172/178<br>(97%)       | TLR2,TLR4,FCER1G,IL1B,IL1R1,TNFRSF1B                   |
| <b>Acute Phase Response Signaling</b>                                               | 5.11                 | 0.0296       | -2.236         | 5/169<br>(3%)        | 0/169<br>(0%)    | 0/169<br>(0%)      | 164/169<br>(97%)       | IL1B,IL6,CEBPB,IL1R1,TNFRSF1B                          |
| <b>PPAR Signaling</b>                                                               | 4.82                 | 0.0435       | 2              | 4/92<br>(4%)         | 0/92<br>(0%)     | 0/92<br>(0%)       | 88/92<br>(96%)         | IL1B,PTGS2,IL1R1,TNFRSF1B                              |
| <b>Type I Diabetes Mellitus Signaling</b>                                           | 4.56                 | 0.0374       | -2             | 4/107<br>(4%)        | 0/107<br>(0%)    | 0/107<br>(0%)      | 103/107<br>(96%)       | FCER1G,IL1B,IL1R1,TNFRSF1B                             |
| <b>IL-8 Signaling</b>                                                               | 3.54                 | 0.0204       | -2             | 4/196<br>(2%)        | 0/196<br>(0%)    | 0/196<br>(0%)      | 192/196<br>(98%)       | CXCL8,ICAM1,PTGS2,ITGAX                                |
| <b>LPS/IL-1 Mediated Inhibition of RXR Function</b>                                 | 3.44                 | 0.0192       | -2             | 4/208<br>(2%)        | 0/208<br>(0%)    | 0/208<br>(0%)      | 204/208<br>(98%)       | TLR4,IL1B,IL1R1,TNFRSF1B                               |
| <b>Colorectal Cancer Metastasis Signaling</b>                                       | 3.19                 | 0.0165       | -2             | 4/243<br>(2%)        | 0/243<br>(0%)    | 0/243<br>(0%)      | 239/243<br>(98%)       | TLR2,TLR4,IL6,PTGS2                                    |

Table E7-1: Candidated marker genes and selected marker genes used in analysis of validation cohort

| Cell subset     | Marker gene type | Marker gene name |         |         |         |         |         |         |         |          |        |         |         |        |         |        |         |       |           |         |        |        |        |      |  |  |  |  |  |  |  |
|-----------------|------------------|------------------|---------|---------|---------|---------|---------|---------|---------|----------|--------|---------|---------|--------|---------|--------|---------|-------|-----------|---------|--------|--------|--------|------|--|--|--|--|--|--|--|
| T cells         | Candidate        | 20               | CD3D    | LTB     | TRBC1   | CD2     | LCK     | ITK     | CD247   | CD3E     | BCL11B | KIR2DS1 | CD27    | CD69   | GZMK    | PTPRC  | ZAP70   | CD3G  | NKG7      | DGKA    | CD6    | SH2D1A |        |      |  |  |  |  |  |  |  |
|                 | Selected         | 8                | CD3D    | TRBC1   | CD2     | LCK     | CD27    | PTPRC   | ZAP70   | CD6      |        |         |         |        |         |        |         |       |           |         |        |        |        |      |  |  |  |  |  |  |  |
| CD8 T cells     | Candidate        | 20               | IL7R    | CD8A    | GZMK    | GZMH    | CD3E    | PIK3IP1 | CST7    | DUSP2    | GNLY   | CD8B    | TCF7    | NCR3   | MAP4K1  | CD6    | CRTAM   | LY9   | ZGPAT     | FLT3LG  | CDC14B | KLRF1  |        |      |  |  |  |  |  |  |  |
|                 | Selected         | 4                | CD8A    | GZMK    | CD8B    | TCF7    |         |         |         |          |        |         |         |        |         |        |         |       |           |         |        |        |        |      |  |  |  |  |  |  |  |
| CD4 T cells     | Candidate        | 21               | LAT     | IL9     | ASGR2   | ZFP36L2 | PBXIP1  | ETS1    | ACAP1   | ANGPT4   | CD40LG | IL3     | GAL3ST4 | RPL10L | VILL    | EPHA1  | RRP9    | ORC1  | EPB41     | ZNF204P | CXorf5 | FBXL8  | CD28   |      |  |  |  |  |  |  |  |
|                 | Selected         | 4                | LAT     | PBXIP1  | ACAP1   | CD28    |         |         |         |          |        |         |         |        |         |        |         |       |           |         |        |        |        |      |  |  |  |  |  |  |  |
| Monocytes       | Candidate        | 15               | FCN1    | MNDA    | S100A12 | FPR1    | HCK     | LST1    | TLR2    | RNASE2   | FOSB   | CHST15  | VNN2    | CCR2   | CD1D    | CSF3RA | CLEC7A  |       |           |         |        |        |        |      |  |  |  |  |  |  |  |
|                 | Selected         | 5                | S100A12 | FPR1    | HCK     | LST1    | CLEC7A  |         |         |          |        |         |         |        |         |        |         |       |           |         |        |        |        |      |  |  |  |  |  |  |  |
| Macrophages     | Candidate        | 20               | MMP9    | CXCL9   | CD40    | CD38    | APOL3   | CYP27B1 | SLAMF1  | NPL      | CCL23  | BHLHE41 | CXCL5   | PPBP   | QPCT    | CCL14  | DCSTAMP | RENBP | ADAM28    | CHI3L1  | CXCL3  | CCL7   |        |      |  |  |  |  |  |  |  |
|                 | Selected         | 5                | MMP9    | CXCL5   | PPBP    | CXCL3   | CCL7    |         |         |          |        |         |         |        |         |        |         |       |           |         |        |        |        |      |  |  |  |  |  |  |  |
| Macrophages(M2) | Candidate        | 22               | MS4A6A  | CCL18   | ADRB2   | CD4     | CLEC4A  | CCL13   | SLC15A3 | CLEC10A  | CCL23  | ADAM28  | NPL     | TREM2  | SIGLEC1 | P2RY13 | CCL8    | CD68  | CD209     | CCL14   | CLIC2  | HRH1   | CHI3L1 | CFP1 |  |  |  |  |  |  |  |
|                 | Selected         | 5                | CLEC4A  | SLC15A3 | NPL     | CLIC2   | CFP1    |         |         |          |        |         |         |        |         |        |         |       |           |         |        |        |        |      |  |  |  |  |  |  |  |
| B cells         | Candidate        | 21               | IGK     | IGHM    | MS4A1   | CD37    | CD79A   | SELL    | P2RX5   | GUSBP11  | IRF8   | BANK1   | IGLL3P  | LY86   | IGHD    | IL4R   | TCL1A   | CD19  | KIAA0226L | HLA-DOB | SIK1   | CD79B  | FAM65B |      |  |  |  |  |  |  |  |
|                 | Selected         | 7                | IGK     | IGHM    | CD37    | CD79A   | SELL    | CD19    | CD79B   |          |        |         |         |        |         |        |         |       |           |         |        |        |        |      |  |  |  |  |  |  |  |
| DCs             | Candidate        | 21               | CCL22   | LAMP3   | IDO1    | MMP12   | CD1B    | ACP5    | CD1A    | HLA-DQA1 | CXCL10 | BIRC3   | PLA2G7  | CD1E   | FPR3    | KYNU   | RNASE6  | CCL13 | TNFAIP6   | CCL17   | RSAD2  | CLIC2  | TREM2  |      |  |  |  |  |  |  |  |
|                 | Selected         | 5                | LAMP3   | PLA2G7  | KYNU    | TNFAIP6 | CLIC2   |         |         |          |        |         |         |        |         |        |         |       |           |         |        |        |        |      |  |  |  |  |  |  |  |
| DCs(activated)  | Candidate        | 21               | LAMP3   | IDO1    | CXCL10  | BIRC3   | TNFAIP6 | RSAD2   | KYNU    | CCL17    | CD80   | CD86    | FPR3    | IFI44L | CXCL11  | MMP12  | CHST7   | CCL19 | AQP9      | RASSF4  | IL12B  | CD1B   | NR4A3  |      |  |  |  |  |  |  |  |
|                 | Selected         | 5                | LAMP3   | IDO1    | CXCL10  | BIRC3   | TNFAIP6 | RSAD2   | KYNU    | CCL17    | CD80   | CD86    | FPR3    | IFI44L | CXCL11  | MMP12  | CHST7   | CCL19 | AQP9      | RASSF4  | IL12B  | CD1B   | NR4A3  |      |  |  |  |  |  |  |  |

NK cells  
 Selected Candidate Genes: 5 LAMP3, IDO1, TNFAIP6, KYNU, NR4A3, CCL4, IL2RB, APOB, IL18R1, TBX21, CCND2, KIR2DS1, FASLG, TXK, TTC38, CD244, DEFA4, CD160, PLEKH F1, KIR2DL2, PRR5L2, IL12RB, IL18R1, CAMP, KIR3DL1, CEACAM8

Selected Candidate Genes: 4 IL2RB, FASLG, PRR5L, IL18R1

Total number of candidate marker genes: 202

Total number of selected marker gene: 52

Table E7-2: Pairwise similarity across 134 subjects in validation cohort (T cells)

| Similarity matrix | CD3D  | LTB   | TRBC1 | CD2   | LCK   | ITK   | CD247 | CD3E  | BCL11B | KIR2DS1 | CD27  | CD69  | GZMK  | PTPRCAP | ZAP70 | CD3G  | NKG7  | DGKA  | CD6   | SH2D1A | Probe #     |
|-------------------|-------|-------|-------|-------|-------|-------|-------|-------|--------|---------|-------|-------|-------|---------|-------|-------|-------|-------|-------|--------|-------------|
| <b>CD3D</b>       | 1.00  | 0.62  | 0.78  | 0.73  | 0.74  | 0.51  | 0.43  | 0.37  | 0.46   | -0.20   | 0.64  | 0.19  | 0.56  | 0.69    | 0.60  | 0.34  | 0.31  | 0.58  | 0.59  | 0.35   | 213539_at   |
| <b>LTB</b>        | 0.62  | 1.00  | 0.70  | 0.60  | 0.68  | 0.36  | 0.54  | 0.17  | 0.52   | -0.24   | 0.65  | 0.17  | 0.52  | 0.63    | 0.44  | 0.41  | 0.41  | 0.57  | 0.48  | 0.49   | 207339_s_at |
| <b>TRBC1</b>      | 0.78  | 0.70  | 1.00  | 0.79  | 0.84  | 0.50  | 0.42  | 0.43  | 0.46   | -0.19   | 0.72  | 0.12  | 0.56  | 0.68    | 0.59  | 0.31  | 0.49  | 0.62  | 0.71  | 0.39   | 213193_x_at |
| <b>CD2</b>        | 0.73  | 0.60  | 0.79  | 1.00  | 0.84  | 0.70  | 0.49  | 0.48  | 0.58   | -0.19   | 0.66  | 0.32  | 0.70  | 0.72    | 0.68  | 0.41  | 0.60  | 0.74  | 0.72  | 0.53   | 205831_at   |
| <b>LCK</b>        | 0.74  | 0.68  | 0.84  | 0.84  | 1.00  | 0.58  | 0.37  | 0.51  | 0.57   | -0.24   | 0.72  | 0.22  | 0.57  | 0.75    | 0.69  | 0.34  | 0.54  | 0.72  | 0.70  | 0.46   | 204891_s_at |
| <b>ITK</b>        | 0.51  | 0.36  | 0.50  | 0.70  | 0.58  | 1.00  | 0.48  | 0.33  | 0.45   | -0.15   | 0.30  | 0.63  | 0.59  | 0.42    | 0.43  | 0.19  | 0.25  | 0.49  | 0.49  | 0.49   | 211339_s_at |
| <b>CD247</b>      | 0.43  | 0.54  | 0.42  | 0.49  | 0.37  | 0.48  | 1.00  | 0.01  | 0.55   | -0.07   | 0.30  | 0.35  | 0.50  | 0.27    | 0.19  | 0.21  | 0.45  | 0.46  | 0.38  | 0.63   | 210031_at   |
| <b>CD3E</b>       | 0.37  | 0.17  | 0.43  | 0.48  | 0.51  | 0.33  | 0.01  | 1.00  | 0.24   | -0.07   | 0.30  | 0.02  | 0.33  | 0.32    | 0.32  | 0.18  | 0.28  | 0.36  | 0.48  | 0.12   | 205456_at   |
| <b>BCL11B</b>     | 0.46  | 0.52  | 0.46  | 0.58  | 0.57  | 0.45  | 0.55  | 0.24  | 1.00   | -0.09   | 0.46  | 0.39  | 0.56  | 0.32    | 0.35  | 0.11  | 0.45  | 0.44  | 0.49  | 0.64   | 219528_s_at |
| <b>KIR2DS1</b>    | -0.20 | -0.24 | -0.19 | -0.19 | -0.24 | -0.15 | -0.07 | -0.07 | -0.09  | 1.00    | -0.21 | 0.05  | -0.06 | -0.18   | -0.30 | -0.10 | -0.16 | -0.16 | -0.08 | -0.17  | 211532_x_at |
| <b>CD27</b>       | 0.64  | 0.65  | 0.72  | 0.66  | 0.72  | 0.30  | 0.30  | 0.30  | 0.46   | -0.21   | 1.00  | -0.11 | 0.53  | 0.73    | 0.58  | 0.36  | 0.52  | 0.62  | 0.53  | 0.39   | 206150_at   |

|                |      |      |      |      |      |      |      |      |      |       |       |      |      |      |      |      |      |      |      |      |           |
|----------------|------|------|------|------|------|------|------|------|------|-------|-------|------|------|------|------|------|------|------|------|------|-----------|
| <b>CD69</b>    | 0.19 | 0.17 | 0.12 | 0.32 | 0.22 | 0.63 | 0.35 | 0.02 | 0.39 | 0.05  | -0.11 | 1.00 | 0.33 | 0.06 | 0.12 | 0.08 | 0.03 | 0.16 | 0.22 | 0.36 | 209795_at |
| <b>GZMK</b>    | 0.56 | 0.52 | 0.56 | 0.70 | 0.57 | 0.59 | 0.50 | 0.33 | 0.56 | -0.06 | 0.53  | 0.33 | 1.00 | 0.43 | 0.44 | 0.26 | 0.58 | 0.39 | 0.55 | 0.60 | 206666_at |
| <b>PTPRCAP</b> | 0.69 | 0.63 | 0.68 | 0.72 | 0.75 | 0.42 | 0.27 | 0.32 | 0.32 | -0.18 | 0.73  | 0.06 | 0.43 | 1.00 | 0.60 | 0.45 | 0.49 | 0.80 | 0.53 | 0.25 | 204960_at |
| <b>ZAP70</b>   | 0.60 | 0.44 | 0.59 | 0.68 | 0.69 | 0.43 | 0.19 | 0.32 | 0.35 | -0.30 | 0.58  | 0.12 | 0.44 | 0.60 | 1.00 | 0.32 | 0.37 | 0.51 | 0.57 | 0.36 | 214032_at |
| <b>CD3G</b>    | 0.34 | 0.41 | 0.31 | 0.41 | 0.34 | 0.19 | 0.21 | 0.18 | 0.11 | -0.10 | 0.36  | 0.08 | 0.26 | 0.45 | 0.32 | 1.00 | 0.21 | 0.39 | 0.25 | 0.13 | 206804_at |
| <b>NKG7</b>    | 0.31 | 0.41 | 0.49 | 0.60 | 0.54 | 0.25 | 0.45 | 0.28 | 0.45 | -0.16 | 0.52  | 0.03 | 0.58 | 0.49 | 0.37 | 0.21 | 1.00 | 0.48 | 0.43 | 0.54 | 213915_at |
| <b>DGKA</b>    | 0.58 | 0.57 | 0.62 | 0.74 | 0.72 | 0.49 | 0.46 | 0.36 | 0.44 | -0.16 | 0.62  | 0.16 | 0.39 | 0.80 | 0.51 | 0.39 | 0.48 | 1.00 | 0.57 | 0.39 | 203385_at |
| <b>CD6</b>     | 0.59 | 0.48 | 0.71 | 0.72 | 0.70 | 0.49 | 0.38 | 0.48 | 0.49 | -0.08 | 0.53  | 0.22 | 0.55 | 0.53 | 0.57 | 0.25 | 0.43 | 0.57 | 1.00 | 0.34 | 213958_at |
| <b>SH2D1A</b>  | 0.35 | 0.49 | 0.39 | 0.53 | 0.46 | 0.49 | 0.63 | 0.12 | 0.64 | -0.17 | 0.39  | 0.36 | 0.60 | 0.25 | 0.36 | 0.13 | 0.54 | 0.39 | 0.34 | 1.00 | 210116_at |

Table E7-3: Pairwise similarity across 134 subjects in validation cohort (CD8 T cells)

| Similarity matrix | IL7R | CD8A | GZMK | GZMH | CD3E | PIK3IP1 | CST7  | DUSP2 | GNLY  | CD8B | TCF7  | NCR3  | MAP4K1 | CD6  | CRTAM | LY9  | ZGPAT | FLT3LG | CDC14B | KLRF1 | Probe #   |
|-------------------|------|------|------|------|------|---------|-------|-------|-------|------|-------|-------|--------|------|-------|------|-------|--------|--------|-------|-----------|
| <b>IL7R</b>       | 1.00 | 0.02 | 0.15 | 0.00 | 0.12 | 0.60    | -0.13 | -0.15 | -0.28 | 0.18 | -0.06 | -0.06 | 0.10   | 0.19 | 0.08  | 0.23 | -0.07 | 0.11   | -0.14  | -0.01 | 205798_at |
| <b>CD8A</b>       | 0.02 | 1.00 | 0.55 | 0.38 | 0.19 | 0.28    | 0.46  | 0.18  | 0.53  | 0.53 | 0.44  | 0.19  | 0.43   | 0.60 | 0.29  | 0.09 | 0.27  | 0.29   | -0.16  | 0.32  | 205758_at |
| <b>GZMK</b>       | 0.15 | 0.55 | 1.00 | 0.50 | 0.33 | 0.39    | 0.23  | -0.31 | 0.30  | 0.63 | 0.54  | 0.12  | 0.44   | 0.55 | 0.48  | 0.01 | 0.20  | 0.29   | -0.25  | 0.43  | 206666_at |
| <b>GZMH</b>       | 0.00 | 0.38 | 0.50 | 1.00 | 0.08 | 0.22    | 0.65  | 0.14  | 0.51  | 0.17 | 0.09  | -0.06 | 0.18   | 0.26 | 0.22  | 0.20 | 0.32  | 0.09   | -0.01  | 0.75  | 210321_at |
| <b>CD3E</b>       | 0.12 | 0.19 | 0.33 | 0.08 | 1.00 | 0.24    | -0.01 | -0.26 | -0.04 | 0.31 | 0.32  | 0.01  | 0.39   | 0.48 | 0.21  | 0.04 | 0.17  | 0.35   | -0.08  | 0.12  | 205456_at |

|                |       |       |       |       |       |       |       |       |       |       |       |       |       |       |       |       |       |       |       |       |             |
|----------------|-------|-------|-------|-------|-------|-------|-------|-------|-------|-------|-------|-------|-------|-------|-------|-------|-------|-------|-------|-------|-------------|
| <b>PIK3IP1</b> | 0.60  | 0.28  | 0.39  | 0.22  | 0.24  | 1.00  | 0.08  | -0.23 | -0.14 | 0.38  | 0.03  | -0.02 | 0.36  | 0.41  | 0.03  | 0.17  | 0.00  | 0.19  | -0.11 | 0.09  | 221756_at   |
| <b>CST7</b>    | -0.13 | 0.46  | 0.23  | 0.65  | -0.01 | 0.08  | 1.00  | 0.47  | 0.73  | 0.01  | 0.01  | 0.00  | 0.22  | 0.23  | -0.01 | 0.23  | 0.34  | 0.05  | 0.05  | 0.58  | 210140_at   |
| <b>DUSP2</b>   | -0.15 | 0.18  | -0.31 | 0.14  | -0.26 | -0.23 | 0.47  | 1.00  | 0.43  | -0.40 | -0.35 | -0.01 | -0.16 | -0.09 | -0.21 | 0.18  | 0.16  | -0.21 | 0.23  | 0.18  | 204794_at   |
| <b>GNLY</b>    | -0.28 | 0.53  | 0.30  | 0.51  | -0.04 | -0.14 | 0.73  | 0.43  | 1.00  | 0.08  | 0.21  | 0.11  | 0.24  | 0.32  | 0.16  | 0.19  | 0.41  | 0.05  | -0.01 | 0.55  | 205495_s_at |
| <b>CD8B</b>    | 0.18  | 0.53  | 0.63  | 0.17  | 0.31  | 0.38  | 0.01  | -0.40 | 0.08  | 1.00  | 0.58  | 0.13  | 0.53  | 0.55  | 0.34  | 0.01  | 0.20  | 0.50  | -0.41 | 0.06  | 207979_s_at |
| <b>TCF7</b>    | -0.06 | 0.44  | 0.54  | 0.09  | 0.32  | 0.03  | 0.01  | -0.35 | 0.21  | 0.58  | 1.00  | 0.26  | 0.49  | 0.52  | 0.36  | -0.13 | 0.11  | 0.36  | -0.20 | 0.06  | 205255_x_at |
| <b>NCR3</b>    | -0.06 | 0.19  | 0.12  | -0.06 | 0.01  | -0.02 | 0.00  | -0.01 | 0.11  | 0.13  | 0.26  | 1.00  | 0.07  | 0.11  | -0.13 | -0.25 | -0.15 | -0.13 | -0.04 | -0.07 | 210763_x_at |
| <b>MAP4K1</b>  | 0.10  | 0.43  | 0.44  | 0.18  | 0.39  | 0.36  | 0.22  | -0.16 | 0.24  | 0.53  | 0.49  | 0.07  | 1.00  | 0.61  | 0.21  | 0.19  | 0.41  | 0.51  | -0.23 | 0.02  | 214339_s_at |
| <b>CD6</b>     | 0.19  | 0.60  | 0.55  | 0.26  | 0.48  | 0.41  | 0.23  | -0.09 | 0.32  | 0.55  | 0.52  | 0.11  | 0.61  | 1.00  | 0.31  | 0.13  | 0.35  | 0.43  | -0.16 | 0.13  | 213958_at   |
| <b>CRTAM</b>   | 0.08  | 0.29  | 0.48  | 0.22  | 0.21  | 0.03  | -0.01 | -0.21 | 0.16  | 0.34  | 0.36  | -0.13 | 0.21  | 0.31  | 1.00  | 0.09  | 0.31  | 0.43  | -0.29 | 0.24  | 206914_at   |
| <b>LY9</b>     | 0.23  | 0.09  | 0.01  | 0.20  | 0.04  | 0.17  | 0.23  | 0.18  | 0.19  | 0.01  | -0.13 | -0.25 | 0.19  | 0.13  | 0.09  | 1.00  | 0.38  | 0.25  | -0.05 | 0.28  | 215967_s_at |
| <b>ZGPAT</b>   | -0.07 | 0.27  | 0.20  | 0.32  | 0.17  | 0.00  | 0.34  | 0.16  | 0.41  | 0.20  | 0.11  | -0.15 | 0.41  | 0.35  | 0.31  | 0.38  | 1.00  | 0.46  | -0.24 | 0.38  | 57539_at    |
| <b>FLT3LG</b>  | 0.11  | 0.29  | 0.29  | 0.09  | 0.35  | 0.19  | 0.05  | -0.21 | 0.05  | 0.50  | 0.36  | -0.13 | 0.51  | 0.43  | 0.43  | 0.25  | 0.46  | 1.00  | -0.37 | 0.02  | 210607_at   |
| <b>CDC14B</b>  | -0.14 | -0.16 | -0.25 | -0.01 | -0.08 | -0.11 | 0.05  | 0.23  | -0.01 | -0.41 | -0.20 | -0.04 | -0.23 | -0.16 | -0.29 | -0.05 | -0.24 | -0.37 | 1.00  | -0.08 | 221555_x_at |
| <b>KLRF1</b>   | -0.01 | 0.32  | 0.43  | 0.75  | 0.12  | 0.09  | 0.58  | 0.18  | 0.55  | 0.06  | 0.06  | -0.07 | 0.02  | 0.13  | 0.24  | 0.28  | 0.38  | 0.02  | -0.08 | 1.00  | 220646_s_at |

Table E7-4: Pairwise similarity across 134 subjects in validation cohort (CD4 T cells)

| Similarity<br>metrix | LAT   | IL9   | ASGR2 | ZFP36<br>L2 | PBXIP<br>1 | ETS1  | ACAP1 | ANGP<br>T4 | CD40L<br>G | IL3   | GAL3S<br>T4 | RPL10<br>L | VILL  | EPHA1 | RRP9  | ORC1  | EPB41 | ZNF20<br>4P | CXorf<br>57 | FBXL8 | CD28  | Probe<br>#      |
|----------------------|-------|-------|-------|-------------|------------|-------|-------|------------|------------|-------|-------------|------------|-------|-------|-------|-------|-------|-------------|-------------|-------|-------|-----------------|
| LAT                  | 1.00  | -0.10 | 0.02  | 0.06        | 0.47       | 0.01  | 0.65  | -0.25      | 0.00       | -0.03 | -0.01       | 0.24       | 0.39  | 0.39  | 0.15  | 0.12  | -0.14 | 0.26        | 0.37        | 0.09  | 0.53  | 21100<br>5_at   |
| IL9                  | -0.10 | 1.00  | 0.22  | 0.03        | -0.11      | -0.19 | -0.05 | 0.18       | 0.16       | 0.15  | 0.04        | 0.10       | 0.01  | 0.17  | 0.07  | 0.01  | -0.27 | -0.13       | -0.25       | 0.03  | -0.21 | 20819<br>3_at   |
| ASGR2                | 0.02  | 0.22  | 1.00  | -0.06       | -0.07      | -0.06 | -0.12 | 0.20       | 0.13       | 0.23  | 0.04        | 0.14       | 0.06  | -0.02 | -0.12 | 0.21  | -0.22 | -0.06       | -0.26       | 0.03  | -0.17 | 20613<br>0_s_at |
| ZFP36L2              | 0.06  | 0.03  | -0.06 | 1.00        | 0.50       | 0.30  | 0.23  | -0.35      | -0.25      | 0.10  | 0.13        | 0.20       | 0.32  | -0.02 | 0.04  | 0.11  | 0.13  | 0.35        | 0.37        | 0.09  | 0.40  | 20136<br>8_at   |
| PBXIP1               | 0.47  | -0.11 | -0.07 | 0.50        | 1.00       | 0.18  | 0.53  | -0.31      | -0.21      | -0.03 | 0.27        | 0.21       | 0.38  | 0.10  | 0.13  | 0.10  | -0.02 | 0.37        | 0.44        | 0.16  | 0.61  | 21417<br>7_s_at |
| ETS1                 | 0.01  | -0.19 | -0.06 | 0.30        | 0.18       | 1.00  | 0.10  | -0.14      | -0.09      | -0.01 | -0.09       | -0.08      | 0.04  | -0.12 | -0.10 | -0.02 | 0.14  | 0.10        | 0.35        | 0.00  | 0.25  | 21444<br>7_at   |
| ACAP1                | 0.65  | -0.05 | -0.12 | 0.23        | 0.53       | 0.10  | 1.00  | -0.26      | 0.03       | -0.04 | 0.08        | 0.28       | 0.55  | 0.48  | 0.29  | 0.15  | -0.04 | 0.38        | 0.35        | 0.29  | 0.53  | 20521<br>3_at   |
| ANGPT4               | -0.25 | 0.18  | 0.20  | -0.35       | -0.31      | -0.14 | -0.26 | 1.00       | 0.25       | 0.03  | -0.15       | -0.14      | -0.06 | 0.12  | -0.04 | 0.11  | -0.09 | -0.32       | -0.37       | -0.03 | -0.29 | 22113<br>4_at   |
| CD40LG               | 0.00  | 0.16  | 0.13  | -0.25       | -0.21      | -0.09 | 0.03  | 0.25       | 1.00       | 0.08  | -0.15       | 0.03       | -0.04 | 0.20  | 0.10  | -0.05 | -0.11 | -0.11       | -0.16       | 0.18  | -0.26 | 20789<br>2_at   |
| IL3                  | -0.03 | 0.15  | 0.23  | 0.10        | -0.03      | -0.01 | -0.04 | 0.03       | 0.08       | 1.00  | -0.03       | 0.11       | 0.10  | -0.14 | 0.00  | 0.14  | 0.02  | -0.13       | -0.05       | 0.00  | -0.09 | 20790<br>6_at   |
| GAL3ST4              | -0.01 | 0.04  | 0.04  | 0.13        | 0.27       | -0.09 | 0.08  | -0.15      | -0.15      | -0.03 | 1.00        | -0.03      | 0.09  | 0.01  | 0.13  | 0.03  | -0.14 | 0.04        | -0.07       | 0.15  | -0.06 | 21981<br>5_at   |
| RPL10L               | 0.24  | 0.10  | 0.14  | 0.20        | 0.21       | -0.08 | 0.28  | -0.14      | 0.03       | 0.11  | -0.03       | 1.00       | 0.21  | 0.09  | 0.14  | 0.19  | -0.24 | 0.07        | -0.02       | 0.04  | 0.18  | 21755<br>9_at   |
| VILL                 | 0.39  | 0.01  | 0.06  | 0.32        | 0.38       | 0.04  | 0.55  | -0.06      | -0.04      | 0.10  | 0.09        | 0.21       | 1.00  | 0.32  | 0.26  | 0.26  | 0.13  | 0.26        | 0.27        | 0.24  | 0.35  | 20995<br>0_s_at |
| EPHA1                | 0.39  | 0.17  | -0.02 | -0.02       | 0.10       | -0.12 | 0.48  | 0.12       | 0.20       | -0.14 | 0.01        | 0.09       | 0.32  | 1.00  | 0.37  | 0.15  | -0.10 | 0.08        | -0.01       | 0.25  | 0.14  | 20597<br>7_s_at |
| RRP9                 | 0.15  | 0.07  | -0.12 | 0.04        | 0.13       | -0.10 | 0.29  | -0.04      | 0.10       | 0.00  | 0.13        | 0.14       | 0.26  | 0.37  | 1.00  | 0.16  | -0.07 | 0.01        | 0.02        | 0.34  | 0.04  | 20413<br>3_at   |

|                |       |       |       |      |       |       |       |       |       |       |       |       |      |       |       |       |       |      |      |      |      |                 |
|----------------|-------|-------|-------|------|-------|-------|-------|-------|-------|-------|-------|-------|------|-------|-------|-------|-------|------|------|------|------|-----------------|
| <b>ORC1</b>    | 0.12  | 0.01  | 0.21  | 0.11 | 0.10  | -0.02 | 0.15  | 0.11  | -0.05 | 0.14  | 0.03  | 0.19  | 0.26 | 0.15  | 0.16  | 1.00  | -0.07 | 0.07 | 0.02 | 0.09 | 0.09 | 20508<br>5_at   |
| <b>EPB41</b>   | -0.14 | -0.27 | -0.22 | 0.13 | -0.02 | 0.14  | -0.04 | -0.09 | -0.11 | 0.02  | -0.14 | -0.24 | 0.13 | -0.10 | -0.07 | -0.07 | 1.00  | 0.31 | 0.24 | 0.09 | 0.19 | 20779<br>3_s_at |
| <b>ZNF204P</b> | 0.26  | -0.13 | -0.06 | 0.35 | 0.37  | 0.10  | 0.38  | -0.32 | -0.11 | -0.13 | 0.04  | 0.07  | 0.26 | 0.08  | 0.01  | 0.07  | 0.31  | 1.00 | 0.43 | 0.17 | 0.47 | 21482<br>3_at   |
| <b>CXorf57</b> | 0.37  | -0.25 | -0.26 | 0.37 | 0.44  | 0.35  | 0.35  | -0.37 | -0.16 | -0.05 | -0.07 | -0.02 | 0.27 | -0.01 | 0.02  | 0.02  | 0.24  | 0.43 | 1.00 | 0.14 | 0.52 | 21935<br>5_at   |
| <b>FBXL8</b>   | 0.09  | 0.03  | 0.03  | 0.09 | 0.16  | 0.00  | 0.29  | -0.03 | 0.18  | 0.00  | 0.15  | 0.04  | 0.24 | 0.25  | 0.34  | 0.09  | 0.09  | 0.17 | 0.14 | 1.00 | 0.05 | 22008<br>0_at   |
| <b>CD28</b>    | 0.53  | -0.21 | -0.17 | 0.40 | 0.61  | 0.25  | 0.53  | -0.29 | -0.26 | -0.09 | -0.06 | 0.18  | 0.35 | 0.14  | 0.04  | 0.09  | 0.19  | 0.47 | 0.52 | 0.05 | 1.00 | 20654<br>5_at   |

Table E7-5: Pairwise similarity across 134 subjects in validation cohort (Monocytes)

| Similarity matrix | FCN1 | MNDA  | S100A12 | FPR1 | HCK   | LST1 | TLR2  | RNASE2 | FOSB  | CHST15 | VNN2  | CCR2  | CD1D  | CSF3R | CLEC7A | Probe #         |
|-------------------|------|-------|---------|------|-------|------|-------|--------|-------|--------|-------|-------|-------|-------|--------|-----------------|
| <b>FCN1</b>       | 1.00 | 0.47  | 0.55    | 0.58 | 0.29  | 0.59 | 0.38  | 0.18   | -0.10 | 0.52   | -0.03 | 0.43  | -0.06 | 0.41  | 0.59   | 20523<br>7_at   |
| <b>MNDA</b>       | 0.47 | 1.00  | 0.36    | 0.23 | 0.18  | 0.30 | 0.24  | -0.05  | -0.12 | 0.24   | 0.16  | 0.42  | 0.08  | 0.22  | 0.29   | 20495<br>9_at   |
| <b>S100A12</b>    | 0.55 | 0.36  | 1.00    | 0.79 | 0.80  | 0.72 | 0.74  | 0.10   | -0.14 | 0.50   | 0.22  | 0.37  | -0.08 | 0.39  | 0.74   | 20586<br>3_at   |
| <b>FPR1</b>       | 0.58 | 0.23  | 0.79    | 1.00 | 0.64  | 0.72 | 0.65  | 0.16   | -0.16 | 0.46   | 0.08  | 0.37  | -0.09 | 0.41  | 0.69   | 20511<br>9_s_at |
| <b>HCK</b>        | 0.29 | 0.18  | 0.80    | 0.64 | 1.00  | 0.62 | 0.76  | -0.07  | -0.08 | 0.41   | 0.24  | 0.31  | -0.02 | 0.26  | 0.59   | 20801<br>8_s_at |
| <b>LST1</b>       | 0.59 | 0.30  | 0.72    | 0.72 | 0.62  | 1.00 | 0.69  | 0.10   | -0.02 | 0.59   | 0.07  | 0.35  | -0.13 | 0.36  | 0.73   | 21457<br>4_x_at |
| <b>TLR2</b>       | 0.38 | 0.24  | 0.74    | 0.65 | 0.76  | 0.69 | 1.00  | -0.01  | -0.05 | 0.65   | 0.08  | 0.22  | -0.16 | 0.31  | 0.75   | 20492<br>4_at   |
| <b>RNASE2</b>     | 0.18 | -0.05 | 0.10    | 0.16 | -0.07 | 0.10 | -0.01 | 1.00   | 0.06  | 0.09   | -0.10 | -0.08 | -0.19 | 0.07  | 0.15   | 20611<br>1_at   |

|               |       |       |       |       |       |       |       |       |       |      |       |       |       |       |       |             |
|---------------|-------|-------|-------|-------|-------|-------|-------|-------|-------|------|-------|-------|-------|-------|-------|-------------|
| <b>FOSB</b>   | -0.10 | -0.12 | -0.14 | -0.16 | -0.08 | -0.02 | -0.05 | 0.06  | 1.00  | 0.11 | -0.12 | -0.13 | 0.06  | 0.14  | -0.07 | 202768_at   |
| <b>CHST15</b> | 0.52  | 0.24  | 0.50  | 0.46  | 0.41  | 0.59  | 0.65  | 0.09  | 0.11  | 1.00 | 0.06  | 0.08  | 0.13  | 0.31  | 0.58  | 203066_at   |
| <b>VNN2</b>   | -0.03 | 0.16  | 0.22  | 0.08  | 0.24  | 0.07  | 0.08  | -0.10 | -0.12 | 0.06 | 1.00  | 0.05  | 0.13  | -0.05 | 0.06  | 205922_at   |
| <b>CCR2</b>   | 0.43  | 0.42  | 0.37  | 0.37  | 0.31  | 0.35  | 0.22  | -0.08 | -0.13 | 0.08 | 0.05  | 1.00  | 0.03  | 0.21  | 0.32  | 206978_at   |
| <b>CD1D</b>   | -0.06 | 0.08  | -0.08 | -0.09 | -0.02 | -0.13 | -0.16 | -0.19 | 0.06  | 0.13 | 0.13  | 0.03  | 1.00  | -0.08 | -0.20 | 205789_at   |
| <b>CSF3R</b>  | 0.41  | 0.22  | 0.39  | 0.41  | 0.26  | 0.36  | 0.31  | 0.07  | 0.14  | 0.31 | -0.05 | 0.21  | -0.08 | 1.00  | 0.39  | 203591_s_at |
| <b>CLEC7A</b> | 0.59  | 0.29  | 0.74  | 0.69  | 0.59  | 0.73  | 0.75  | 0.15  | -0.07 | 0.58 | 0.06  | 0.32  | -0.20 | 0.39  | 1.00  | 221698_s_at |

Table E7-6: Pairwise similarity across 134 subjects in validation cohort (Macrophages)

| Similarity matrix | MMP9  | CXCL9 | CD40  | CD38  | APOL3 | CYP27B1 | SLAMF1 | NPL   | CCL23 | BHLHE41 | CXCL5 | PPBP  | QPCT  | CCL14 | DCSTAMP | RENB  | ADAMP28 | CHI3L1 | CXCL3 | CCL7  | Probe #     |
|-------------------|-------|-------|-------|-------|-------|---------|--------|-------|-------|---------|-------|-------|-------|-------|---------|-------|---------|--------|-------|-------|-------------|
| <b>MMP9</b>       | 1.00  | -0.43 | -0.28 | 0.11  | -0.48 | 0.00    | -0.33  | 0.66  | 0.19  | -0.18   | 0.57  | 0.65  | 0.12  | -0.06 | -0.23   | 0.08  | 0.07    | 0.08   | 0.57  | 0.71  | 203936_s_at |
| <b>CXCL9</b>      | -0.43 | 1.00  | 0.38  | 0.07  | 0.42  | 0.04    | 0.21   | -0.25 | -0.05 | -0.01   | -0.26 | -0.38 | -0.14 | 0.08  | 0.33    | 0.03  | -0.25   | -0.10  | -0.32 | -0.26 | 203915_at   |
| <b>CD40</b>       | -0.28 | 0.38  | 1.00  | -0.04 | 0.02  | 0.28    | -0.11  | -0.19 | -0.01 | 0.02    | -0.10 | -0.18 | -0.26 | 0.17  | 0.34    | 0.31  | -0.23   | 0.22   | -0.08 | -0.20 | 35150_at    |
| <b>CD38</b>       | 0.11  | 0.07  | -0.04 | 1.00  | 0.26  | -0.07   | 0.11   | -0.17 | 0.01  | -0.02   | 0.15  | -0.05 | 0.12  | -0.06 | -0.17   | -0.07 | 0.20    | 0.02   | 0.00  | 0.12  | 205692_s_at |
| <b>APOL3</b>      | -0.48 | 0.42  | 0.02  | 0.26  | 1.00  | -0.20   | 0.53   | -0.37 | -0.15 | 0.11    | -0.36 | -0.58 | 0.21  | -0.08 | 0.03    | -0.20 | 0.13    | -0.25  | -0.53 | -0.35 | 221087_s_at |
| <b>CYP27B1</b>    | 0.00  | 0.04  | 0.28  | -0.07 | -0.20 | 1.00    | -0.20  | 0.01  | 0.21  | 0.12    | -0.13 | -0.12 | -0.15 | 0.03  | 0.25    | 0.22  | -0.27   | 0.37   | -0.03 | 0.07  | 205676_at   |
| <b>SLAMF1</b>     | -0.33 | 0.21  | -0.11 | 0.11  | 0.53  | -0.20   | 1.00   | -0.27 | -0.22 | 0.23    | -0.13 | -0.45 | 0.23  | -0.20 | -0.25   | -0.25 | 0.27    | -0.11  | -0.36 | -0.30 | 206181_at   |



|                |       |       |       |       |       |       |       |       |       |       |       |       |       |       |       |       |       |       |       |       |             |
|----------------|-------|-------|-------|-------|-------|-------|-------|-------|-------|-------|-------|-------|-------|-------|-------|-------|-------|-------|-------|-------|-------------|
| <b>NPL</b>     | 0.66  | -0.25 | -0.19 | -0.17 | -0.37 | 0.01  | -0.27 | 1.00  | 0.11  | -0.13 | 0.32  | 0.49  | 0.07  | -0.04 | -0.11 | 0.11  | 0.04  | 0.06  | 0.38  | 0.58  | 221210_s_at |
| <b>CCL23</b>   | 0.19  | -0.05 | -0.01 | 0.01  | -0.15 | 0.21  | -0.22 | 0.11  | 1.00  | -0.15 | -0.03 | 0.15  | -0.23 | 0.11  | 0.09  | 0.16  | -0.14 | 0.16  | 0.25  | 0.00  | 210549_s_at |
| <b>BHLHE41</b> | -0.18 | -0.01 | 0.02  | -0.02 | 0.11  | 0.12  | 0.23  | -0.13 | -0.15 | 1.00  | -0.18 | -0.36 | 0.28  | -0.09 | -0.16 | -0.02 | 0.22  | -0.05 | -0.18 | -0.18 | 221530_s_at |
| <b>CXCL5</b>   | 0.57  | -0.26 | -0.10 | 0.15  | -0.36 | -0.13 | -0.13 | 0.32  | -0.03 | -0.18 | 1.00  | 0.68  | 0.19  | -0.08 | -0.19 | -0.10 | 0.17  | -0.02 | 0.57  | 0.64  | 215101_s_at |
| <b>PPBP</b>    | 0.65  | -0.38 | -0.18 | -0.05 | -0.58 | -0.12 | -0.45 | 0.49  | 0.15  | -0.36 | 0.68  | 1.00  | -0.11 | -0.01 | -0.11 | 0.07  | 0.02  | 0.06  | 0.72  | 0.59  | 214146_s_at |
| <b>QPCT</b>    | 0.12  | -0.14 | -0.26 | 0.12  | 0.21  | -0.15 | 0.23  | 0.07  | -0.23 | 0.28  | 0.19  | -0.11 | 1.00  | -0.23 | -0.27 | -0.24 | 0.33  | -0.21 | -0.24 | 0.18  | 205174_s_at |
| <b>CCL14</b>   | -0.06 | 0.08  | 0.17  | -0.06 | -0.08 | 0.03  | -0.20 | -0.04 | 0.11  | -0.09 | -0.08 | -0.01 | -0.23 | 1.00  | 0.27  | 0.18  | -0.21 | 0.14  | 0.09  | -0.02 | 205392_s_at |
| <b>DCSTAMP</b> | -0.23 | 0.33  | 0.34  | -0.17 | 0.03  | 0.25  | -0.25 | -0.11 | 0.09  | -0.16 | -0.19 | -0.11 | -0.27 | 0.27  | 1.00  | 0.21  | -0.52 | 0.03  | -0.06 | -0.07 | 221266_s_at |
| <b>RENBP</b>   | 0.08  | 0.03  | 0.31  | -0.07 | -0.20 | 0.22  | -0.25 | 0.11  | 0.16  | -0.02 | -0.10 | 0.07  | -0.24 | 0.18  | 0.21  | 1.00  | -0.23 | 0.29  | 0.08  | 0.00  | 206617_s_at |
| <b>ADAM28</b>  | 0.07  | -0.25 | -0.23 | 0.20  | 0.13  | -0.27 | 0.27  | 0.04  | -0.14 | 0.22  | 0.17  | 0.02  | 0.33  | -0.21 | -0.52 | -0.23 | 1.00  | -0.12 | 0.08  | 0.01  | 205997_at   |
| <b>CHI3L1</b>  | 0.08  | -0.10 | 0.22  | 0.02  | -0.25 | 0.37  | -0.11 | 0.06  | 0.16  | -0.05 | -0.02 | 0.06  | -0.21 | 0.14  | 0.03  | 0.29  | -0.12 | 1.00  | 0.15  | -0.12 | 209396_s_at |
| <b>CXCL3</b>   | 0.57  | -0.32 | -0.08 | 0.00  | -0.53 | -0.03 | -0.36 | 0.38  | 0.25  | -0.18 | 0.57  | 0.72  | -0.24 | 0.09  | -0.06 | 0.08  | 0.08  | 0.15  | 1.00  | 0.44  | 207850_at   |
| <b>CCL7</b>    | 0.71  | -0.26 | -0.20 | 0.12  | -0.35 | 0.07  | -0.30 | 0.58  | 0.00  | -0.18 | 0.64  | 0.59  | 0.18  | -0.02 | -0.07 | 0.00  | 0.01  | -0.12 | 0.44  | 1.00  | 208075_s_at |

Table E7-7: Pairwise similarity across 134 subjects in validation cohort (Macrophages-M2)

| Similarity matrix | MS4A6A | CCL18 | ADRB2 | CD4  | CLEC4A | CCL13 | SLC15A3 | CLEC10A | CCL23 | ADAM28 | NPL  | TREM2 | SIGLEC1 | P2RY13 | CCL8 | CD68 | CD209 | CCL14 | CLIC2 | HRH1 | CHI3L1 | CFP  | Probe #   |
|-------------------|--------|-------|-------|------|--------|-------|---------|---------|-------|--------|------|-------|---------|--------|------|------|-------|-------|-------|------|--------|------|-----------|
| <b>MS4A6A</b>     | 1.00   | 0.31  | -0.16 | 0.19 | -0.12  | 0.37  | 0.09    | 0.18    | 0.25  | -0.28  | 0.16 | 0.43  | 0.41    | 0.15   | 0.05 | 0.10 | 0.24  | 0.01  | -0.01 | 0.24 | 0.18   | 0.05 | 219666_at |

|                |       |       |       |       |       |       |       |       |       |       |       |       |       |       |       |       |       |       |       |       |       |       |             |
|----------------|-------|-------|-------|-------|-------|-------|-------|-------|-------|-------|-------|-------|-------|-------|-------|-------|-------|-------|-------|-------|-------|-------|-------------|
| <b>CCL18</b>   | 0.31  | 1.00  | -0.15 | 0.17  | -0.21 | 0.37  | 0.09  | 0.12  | 0.19  | -0.26 | 0.04  | 0.31  | 0.28  | 0.17  | -0.07 | 0.11  | 0.13  | 0.27  | -0.07 | 0.14  | 0.21  | -0.04 | 209924_at   |
| <b>ADRB2</b>   | -0.16 | -0.15 | 1.00  | -0.09 | 0.11  | -0.04 | -0.05 | -0.05 | -0.12 | 0.03  | -0.04 | -0.15 | -0.16 | 0.07  | 0.04  | 0.01  | -0.02 | -0.11 | 0.06  | -0.08 | -0.05 | -0.10 | 206170_at   |
| <b>CD4</b>     | 0.19  | 0.17  | -0.09 | 1.00  | -0.25 | 0.32  | -0.12 | 0.13  | 0.20  | -0.16 | -0.22 | 0.29  | 0.18  | 0.06  | 0.14  | -0.11 | 0.17  | 0.23  | -0.26 | 0.04  | 0.23  | -0.12 | 203547_at   |
| <b>CLEC4A</b>  | -0.12 | -0.21 | 0.11  | -0.25 | 1.00  | -0.11 | 0.55  | 0.04  | -0.02 | 0.13  | 0.49  | -0.17 | 0.08  | -0.08 | -0.01 | 0.42  | -0.21 | -0.22 | 0.55  | 0.12  | -0.06 | 0.69  | 219947_at   |
| <b>CCL13</b>   | 0.37  | 0.37  | -0.04 | 0.32  | -0.11 | 1.00  | 0.15  | 0.24  | 0.20  | -0.31 | 0.01  | 0.45  | 0.45  | 0.09  | -0.01 | 0.13  | 0.30  | 0.19  | -0.07 | 0.20  | 0.43  | 0.09  | 206407_s_at |
| <b>SLC15A3</b> | 0.09  | 0.09  | -0.05 | -0.12 | 0.55  | 0.15  | 1.00  | 0.29  | 0.27  | 0.05  | 0.62  | 0.13  | 0.38  | -0.04 | 0.11  | 0.64  | -0.08 | -0.04 | 0.51  | 0.36  | 0.20  | 0.70  | 219593_at   |
| <b>CLEC10A</b> | 0.18  | 0.12  | -0.05 | 0.13  | 0.04  | 0.24  | 0.29  | 1.00  | 0.16  | -0.08 | 0.25  | 0.27  | 0.35  | -0.06 | 0.07  | 0.31  | 0.00  | 0.16  | 0.13  | 0.07  | 0.27  | 0.24  | 206682_at   |
| <b>CCL23</b>   | 0.25  | 0.19  | -0.12 | 0.20  | -0.02 | 0.20  | 0.27  | 0.16  | 1.00  | -0.14 | 0.11  | 0.17  | 0.25  | 0.04  | -0.03 | 0.21  | 0.00  | 0.11  | -0.04 | 0.07  | 0.16  | 0.07  | 210549_s_at |
| <b>ADAM28</b>  | -0.28 | -0.26 | 0.03  | -0.16 | 0.13  | -0.31 | 0.05  | -0.08 | -0.14 | 1.00  | 0.04  | -0.46 | -0.27 | -0.29 | -0.03 | -0.03 | -0.38 | -0.21 | 0.28  | -0.08 | -0.12 | 0.09  | 205997_at   |
| <b>NPL</b>     | 0.16  | 0.04  | -0.04 | -0.22 | 0.49  | 0.01  | 0.62  | 0.25  | 0.11  | 0.04  | 1.00  | 0.04  | 0.29  | 0.01  | -0.04 | 0.61  | 0.04  | -0.04 | 0.36  | 0.27  | 0.06  | 0.52  | 221210_s_at |
| <b>TREM2</b>   | 0.43  | 0.31  | -0.15 | 0.29  | -0.17 | 0.45  | 0.13  | 0.27  | 0.17  | -0.46 | 0.04  | 1.00  | 0.53  | 0.31  | 0.01  | 0.15  | 0.41  | 0.26  | -0.18 | 0.14  | 0.34  | 0.02  | 219725_at   |
| <b>SIGLEC1</b> | 0.41  | 0.28  | -0.16 | 0.18  | 0.08  | 0.45  | 0.38  | 0.35  | 0.25  | -0.27 | 0.29  | 0.53  | 1.00  | 0.21  | 0.01  | 0.41  | 0.34  | 0.08  | 0.10  | 0.18  | 0.34  | 0.29  | 44673_at    |
| <b>P2RY13</b>  | 0.15  | 0.17  | 0.07  | 0.06  | -0.08 | 0.09  | -0.04 | -0.06 | 0.04  | -0.29 | 0.01  | 0.31  | 0.21  | 1.00  | -0.03 | 0.08  | 0.19  | 0.22  | -0.09 | 0.05  | 0.09  | -0.08 | 220005_at   |
| <b>CCL8</b>    | 0.05  | -0.07 | 0.04  | 0.14  | -0.01 | -0.01 | 0.11  | 0.07  | -0.03 | -0.03 | -0.04 | 0.01  | 0.01  | -0.03 | 1.00  | 0.07  | -0.09 | -0.02 | -0.01 | 0.16  | 0.02  | 0.16  | 214038_at   |
| <b>CD68</b>    | 0.10  | 0.11  | 0.01  | -0.11 | 0.42  | 0.13  | 0.64  | 0.31  | 0.21  | -0.03 | 0.61  | 0.15  | 0.41  | 0.08  | 0.07  | 1.00  | 0.09  | 0.01  | 0.36  | 0.25  | 0.12  | 0.47  | 203507_at   |
| <b>CD209</b>   | 0.24  | 0.13  | -0.02 | 0.17  | -0.21 | 0.30  | -0.08 | 0.00  | 0.00  | -0.38 | 0.04  | 0.41  | 0.34  | 0.19  | -0.09 | 0.09  | 1.00  | 0.08  | -0.13 | 0.03  | 0.21  | -0.21 | 207277_at   |

|               |       |       |       |       |       |       |       |      |       |       |       |       |      |       |       |      |       |       |       |      |      |       |                 |
|---------------|-------|-------|-------|-------|-------|-------|-------|------|-------|-------|-------|-------|------|-------|-------|------|-------|-------|-------|------|------|-------|-----------------|
| <b>CCL14</b>  | 0.01  | 0.27  | -0.11 | 0.23  | -0.22 | 0.19  | -0.04 | 0.16 | 0.11  | -0.21 | -0.04 | 0.26  | 0.08 | 0.22  | -0.02 | 0.01 | 0.08  | 1.00  | -0.16 | 0.15 | 0.14 | -0.08 | 20539<br>2_s_at |
| <b>CLIC2</b>  | -0.01 | -0.07 | 0.06  | -0.26 | 0.55  | -0.07 | 0.51  | 0.13 | -0.04 | 0.28  | 0.36  | -0.18 | 0.10 | -0.09 | -0.01 | 0.36 | -0.13 | -0.16 | 1.00  | 0.27 | 0.02 | 0.54  | 21341<br>5_at   |
| <b>HRH1</b>   | 0.24  | 0.14  | -0.08 | 0.04  | 0.12  | 0.20  | 0.36  | 0.07 | 0.07  | -0.08 | 0.27  | 0.14  | 0.18 | 0.05  | 0.16  | 0.25 | 0.03  | 0.15  | 0.27  | 1.00 | 0.20 | 0.32  | 20557<br>9_at   |
| <b>CHI3L1</b> | 0.18  | 0.21  | -0.05 | 0.23  | -0.06 | 0.43  | 0.20  | 0.27 | 0.16  | -0.12 | 0.06  | 0.34  | 0.34 | 0.09  | 0.02  | 0.12 | 0.21  | 0.14  | 0.02  | 0.20 | 1.00 | 0.09  | 20939<br>6_s_at |
| <b>CFP</b>    | 0.05  | -0.04 | -0.10 | -0.12 | 0.69  | 0.09  | 0.70  | 0.24 | 0.07  | 0.09  | 0.52  | 0.02  | 0.29 | -0.08 | 0.16  | 0.47 | -0.21 | -0.08 | 0.54  | 0.32 | 0.09 | 1.00  | 20638<br>0_s_at |

Table E7-8: Pairwise similarity across 134 subjects in validation cohort (B cells)

| Similarity<br>metrix | IGK  | IGHM | MS4A<br>1 | CD37 | CD79A | SELL | P2RX5 | GUSB<br>P11 | IRF8 | BANK<br>1 | IGLL3<br>P | LY86  | IGHD  | IL4R  | TCL1A | CD19 | KIAA0<br>226L | HLA-<br>DOB | SIK1  | CD79B | FAM6<br>5B | Probe<br>#      |
|----------------------|------|------|-----------|------|-------|------|-------|-------------|------|-----------|------------|-------|-------|-------|-------|------|---------------|-------------|-------|-------|------------|-----------------|
| <b>IGK</b>           | 1.00 | 0.70 | 0.31      | 0.57 | 0.59  | 0.30 | 0.06  | 0.64        | 0.38 | 0.41      | 0.68       | 0.10  | 0.29  | -0.08 | 0.45  | 0.62 | 0.15          | 0.46        | -0.16 | 0.65  | 0.41       | 22165<br>1_x_at |
| <b>IGHM</b>          | 0.70 | 1.00 | 0.39      | 0.63 | 0.69  | 0.53 | 0.26  | 0.59        | 0.45 | 0.51      | 0.58       | 0.11  | 0.13  | 0.15  | 0.53  | 0.72 | 0.15          | 0.35        | 0.05  | 0.70  | 0.38       | 20937<br>4_s_at |
| <b>MS4A1</b>         | 0.31 | 0.39 | 1.00      | 0.46 | 0.42  | 0.33 | 0.07  | 0.25        | 0.29 | 0.53      | 0.13       | 0.16  | 0.14  | 0.01  | 0.16  | 0.42 | 0.20          | 0.07        | -0.03 | 0.45  | 0.36       | 21035<br>6_x_at |
| <b>CD37</b>          | 0.57 | 0.63 | 0.46      | 1.00 | 0.62  | 0.50 | 0.33  | 0.51        | 0.26 | 0.39      | 0.43       | 0.17  | 0.17  | 0.12  | 0.27  | 0.54 | 0.09          | 0.30        | 0.06  | 0.66  | 0.46       | 20419<br>2_at   |
| <b>CD79A</b>         | 0.59 | 0.69 | 0.42      | 0.62 | 1.00  | 0.57 | 0.54  | 0.55        | 0.34 | 0.39      | 0.46       | 0.26  | 0.08  | 0.20  | 0.36  | 0.73 | 0.03          | 0.34        | 0.09  | 0.69  | 0.33       | 20504<br>9_s_at |
| <b>SELL</b>          | 0.30 | 0.53 | 0.33      | 0.50 | 0.57  | 1.00 | 0.47  | 0.26        | 0.38 | 0.39      | 0.26       | 0.16  | 0.04  | 0.18  | 0.33  | 0.56 | -0.11         | 0.33        | 0.03  | 0.46  | 0.45       | 20456<br>3_at   |
| <b>P2RX5</b>         | 0.06 | 0.26 | 0.07      | 0.33 | 0.54  | 0.47 | 1.00  | 0.20        | 0.34 | 0.22      | 0.12       | 0.22  | -0.20 | 0.37  | 0.18  | 0.38 | -0.18         | 0.11        | 0.34  | 0.33  | 0.00       | 21044<br>8_s_at |
| <b>GUSBP11</b>       | 0.64 | 0.59 | 0.25      | 0.51 | 0.55  | 0.26 | 0.20  | 1.00        | 0.25 | 0.32      | 0.70       | -0.05 | 0.07  | 0.06  | 0.32  | 0.43 | 0.20          | 0.24        | 0.02  | 0.58  | 0.28       | 21350<br>2_x_at |
| <b>IRF8</b>          | 0.38 | 0.45 | 0.29      | 0.26 | 0.34  | 0.38 | 0.34  | 0.25        | 1.00 | 0.58      | 0.28       | 0.17  | 0.02  | -0.14 | 0.30  | 0.48 | -0.05         | 0.32        | 0.04  | 0.34  | 0.19       | 20405<br>7_at   |

|                  |       |      |       |      |      |       |       |       |       |      |       |       |       |       |       |       |       |       |       |      |       |             |
|------------------|-------|------|-------|------|------|-------|-------|-------|-------|------|-------|-------|-------|-------|-------|-------|-------|-------|-------|------|-------|-------------|
| <b>BANK1</b>     | 0.41  | 0.51 | 0.53  | 0.39 | 0.39 | 0.39  | 0.22  | 0.32  | 0.58  | 1.00 | 0.36  | 0.07  | 0.10  | 0.01  | 0.27  | 0.53  | 0.18  | 0.11  | 0.16  | 0.52 | 0.39  | 219667_s_at |
| <b>IGLL3P</b>    | 0.68  | 0.58 | 0.13  | 0.43 | 0.46 | 0.26  | 0.12  | 0.70  | 0.28  | 0.36 | 1.00  | -0.03 | 0.05  | 0.05  | 0.36  | 0.51  | 0.17  | 0.28  | -0.04 | 0.56 | 0.32  | 215946_x_at |
| <b>LY86</b>      | 0.10  | 0.11 | 0.16  | 0.17 | 0.26 | 0.16  | 0.22  | -0.05 | 0.17  | 0.07 | -0.03 | 1.00  | 0.11  | -0.05 | 0.12  | 0.26  | -0.23 | 0.14  | -0.01 | 0.09 | -0.09 | 205859_at   |
| <b>IGHD</b>      | 0.29  | 0.13 | 0.14  | 0.17 | 0.08 | 0.04  | -0.20 | 0.07  | 0.02  | 0.10 | 0.05  | 0.11  | 1.00  | -0.23 | -0.09 | 0.13  | -0.02 | 0.12  | -0.05 | 0.13 | 0.15  | 214973_x_at |
| <b>IL4R</b>      | -0.08 | 0.15 | 0.01  | 0.12 | 0.20 | 0.18  | 0.37  | 0.06  | -0.14 | 0.01 | 0.05  | -0.05 | -0.23 | 1.00  | 0.20  | 0.06  | 0.31  | -0.10 | 0.59  | 0.13 | -0.07 | 203233_at   |
| <b>TCL1A</b>     | 0.45  | 0.53 | 0.16  | 0.27 | 0.36 | 0.33  | 0.18  | 0.32  | 0.30  | 0.27 | 0.36  | 0.12  | -0.09 | 0.20  | 1.00  | 0.41  | 0.24  | 0.36  | 0.01  | 0.44 | 0.01  | 209995_s_at |
| <b>CD19</b>      | 0.62  | 0.72 | 0.42  | 0.54 | 0.73 | 0.56  | 0.38  | 0.43  | 0.48  | 0.53 | 0.51  | 0.26  | 0.13  | 0.06  | 0.41  | 1.00  | -0.09 | 0.44  | -0.02 | 0.65 | 0.40  | 206398_s_at |
| <b>KIAA0226L</b> | 0.15  | 0.15 | 0.20  | 0.09 | 0.03 | -0.11 | -0.18 | 0.20  | -0.05 | 0.18 | 0.17  | -0.23 | -0.02 | 0.31  | 0.24  | -0.09 | 1.00  | -0.03 | 0.32  | 0.25 | 0.05  | 219471_at   |
| <b>HLA-DOB</b>   | 0.46  | 0.35 | 0.07  | 0.30 | 0.34 | 0.33  | 0.11  | 0.24  | 0.32  | 0.11 | 0.28  | 0.14  | 0.12  | -0.10 | 0.36  | 0.44  | -0.03 | 1.00  | -0.12 | 0.30 | 0.09  | 205671_s_at |
| <b>SIK1</b>      | -0.16 | 0.05 | -0.03 | 0.06 | 0.09 | 0.03  | 0.34  | 0.02  | 0.04  | 0.16 | -0.04 | -0.01 | -0.05 | 0.59  | 0.01  | -0.02 | 0.32  | -0.12 | 1.00  | 0.00 | -0.16 | 208078_s_at |
| <b>CD79B</b>     | 0.65  | 0.70 | 0.45  | 0.66 | 0.69 | 0.46  | 0.33  | 0.58  | 0.34  | 0.52 | 0.56  | 0.09  | 0.13  | 0.13  | 0.44  | 0.65  | 0.25  | 0.30  | 0.00  | 1.00 | 0.38  | 205297_s_at |
| <b>FAM65B</b>    | 0.41  | 0.38 | 0.36  | 0.46 | 0.33 | 0.45  | 0.00  | 0.28  | 0.19  | 0.39 | 0.32  | -0.09 | 0.15  | -0.07 | 0.01  | 0.40  | 0.05  | 0.09  | -0.16 | 0.38 | 1.00  | 206707_x_at |

Table E7-9: Pairwise similarity across 134 subjects in validation cohort (DCs)

| Similarity matrix | CCL22 | LAMP3 | IDO1 | MMP12 | CD1B  | ACP5  | CD1A  | HLA-DQA1 | CXCL10 | BIRC3 | PLA2G7 | CD1E  | FPR3  | KYNU | RNAS E6 | CCL13 | TNFAIP6 | CCL17 | RSAD2 | CLIC2 | TREM2 | Probe #   |
|-------------------|-------|-------|------|-------|-------|-------|-------|----------|--------|-------|--------|-------|-------|------|---------|-------|---------|-------|-------|-------|-------|-----------|
| <b>CCL22</b>      | 1.00  | 0.55  | 0.35 | 0.07  | -0.12 | 0.11  | 0.02  | 0.12     | -0.07  | -0.08 | 0.25   | -0.10 | -0.23 | 0.36 | -0.03   | 0.02  | 0.27    | -0.01 | -0.19 | 0.23  | -0.06 | 207861_at |
| <b>LAMP3</b>      | 0.55  | 1.00  | 0.72 | -0.01 | -0.21 | -0.07 | -0.09 | 0.05     | -0.09  | -0.05 | 0.54   | -0.23 | -0.15 | 0.68 | 0.20    | -0.08 | 0.48    | -0.27 | 0.27  | 0.49  | -0.19 | 205569_at |

|                 |       |       |       |       |       |       |       |       |       |       |       |       |       |       |       |       |       |       |       |       |       |             |
|-----------------|-------|-------|-------|-------|-------|-------|-------|-------|-------|-------|-------|-------|-------|-------|-------|-------|-------|-------|-------|-------|-------|-------------|
| <b>IDO1</b>     | 0.35  | 0.72  | 1.00  | 0.03  | -0.19 | -0.08 | -0.08 | 0.12  | -0.10 | -0.07 | 0.39  | -0.15 | -0.10 | 0.46  | 0.16  | 0.06  | 0.35  | -0.11 | 0.14  | 0.37  | -0.07 | 210029_at   |
| <b>MMP12</b>    | 0.07  | -0.01 | 0.03  | 1.00  | 0.18  | -0.11 | 0.31  | 0.01  | 0.00  | -0.18 | 0.03  | 0.15  | 0.18  | -0.04 | 0.04  | 0.19  | -0.10 | 0.17  | -0.11 | 0.02  | 0.28  | 204580_at   |
| <b>CD1B</b>     | -0.12 | -0.21 | -0.19 | 0.18  | 1.00  | -0.10 | 0.35  | -0.08 | -0.03 | -0.04 | -0.23 | 0.10  | -0.06 | -0.20 | -0.21 | 0.34  | -0.15 | 0.19  | -0.17 | -0.22 | 0.32  | 206749_at   |
| <b>ACP5</b>     | 0.11  | -0.07 | -0.08 | -0.11 | -0.10 | 1.00  | -0.16 | 0.61  | -0.16 | 0.45  | -0.23 | 0.09  | -0.16 | -0.35 | -0.34 | -0.27 | -0.28 | -0.12 | 0.16  | -0.17 | -0.23 | 204638_at   |
| <b>CD1A</b>     | 0.02  | -0.09 | -0.08 | 0.31  | 0.35  | -0.16 | 1.00  | -0.22 | -0.02 | -0.20 | -0.04 | 0.17  | 0.05  | -0.04 | -0.15 | 0.27  | -0.02 | 0.37  | -0.06 | 0.00  | 0.42  | 210325_at   |
| <b>HLA-DQA1</b> | 0.12  | 0.05  | 0.12  | 0.01  | -0.08 | 0.61  | -0.22 | 1.00  | -0.08 | 0.45  | 0.01  | -0.11 | 0.00  | -0.07 | -0.13 | -0.16 | -0.08 | -0.16 | 0.13  | 0.05  | -0.22 | 212671_s_at |
| <b>CXCL10</b>   | -0.07 | -0.09 | -0.10 | 0.00  | -0.03 | -0.16 | -0.02 | -0.08 | 1.00  | -0.17 | 0.26  | -0.08 | 0.09  | 0.13  | 0.24  | -0.06 | 0.07  | -0.01 | -0.20 | 0.10  | -0.05 | 204533_at   |
| <b>BIRC3</b>    | -0.08 | -0.05 | -0.07 | -0.18 | -0.04 | 0.45  | -0.20 | 0.45  | -0.17 | 1.00  | -0.32 | -0.02 | -0.35 | -0.28 | -0.50 | -0.30 | -0.11 | -0.15 | 0.20  | -0.08 | -0.40 | 210538_s_at |
| <b>PLA2G7</b>   | 0.25  | 0.54  | 0.39  | 0.03  | -0.23 | -0.23 | -0.04 | 0.01  | 0.26  | -0.32 | 1.00  | -0.20 | 0.34  | 0.85  | 0.61  | -0.02 | 0.54  | -0.12 | 0.16  | 0.59  | -0.05 | 206214_at   |
| <b>CD1E</b>     | -0.10 | -0.23 | -0.15 | 0.15  | 0.10  | 0.09  | 0.17  | -0.11 | -0.08 | -0.02 | -0.20 | 1.00  | 0.00  | -0.30 | -0.18 | 0.11  | -0.23 | 0.20  | -0.05 | -0.17 | 0.29  | 215784_at   |
| <b>FPR3</b>     | -0.23 | -0.15 | -0.10 | 0.18  | -0.06 | -0.16 | 0.05  | 0.00  | 0.09  | -0.35 | 0.34  | 0.00  | 1.00  | 0.20  | 0.48  | 0.05  | -0.13 | 0.03  | 0.01  | 0.07  | 0.10  | 214560_at   |
| <b>KYNU</b>     | 0.36  | 0.68  | 0.46  | -0.04 | -0.20 | -0.35 | -0.04 | -0.07 | 0.13  | -0.28 | 0.85  | -0.30 | 0.20  | 1.00  | 0.58  | 0.00  | 0.68  | -0.19 | 0.13  | 0.66  | -0.13 | 217388_s_at |
| <b>RNASE6</b>   | -0.03 | 0.20  | 0.16  | 0.04  | -0.21 | -0.34 | -0.15 | -0.13 | 0.24  | -0.50 | 0.61  | -0.18 | 0.48  | 0.58  | 1.00  | -0.03 | 0.34  | -0.16 | -0.01 | 0.41  | -0.05 | 213566_at   |
| <b>CCL13</b>    | 0.02  | -0.08 | 0.06  | 0.19  | 0.34  | -0.27 | 0.27  | -0.16 | -0.06 | -0.30 | -0.02 | 0.11  | 0.05  | 0.00  | -0.03 | 1.00  | 0.09  | 0.32  | -0.13 | -0.07 | 0.45  | 206407_s_at |
| <b>TNFAIP6</b>  | 0.27  | 0.48  | 0.35  | -0.10 | -0.15 | -0.28 | -0.02 | -0.08 | 0.07  | -0.11 | 0.54  | -0.23 | -0.13 | 0.68  | 0.34  | 0.09  | 1.00  | -0.08 | 0.14  | 0.48  | -0.05 | 206025_s_at |
| <b>CCL17</b>    | -0.01 | -0.27 | -0.11 | 0.17  | 0.19  | -0.12 | 0.37  | -0.16 | -0.01 | -0.15 | -0.12 | 0.20  | 0.03  | -0.19 | -0.16 | 0.32  | -0.08 | 1.00  | -0.15 | -0.19 | 0.34  | 207900_at   |

|              |       |       |       |       |       |       |       |       |       |       |       |       |      |       |       |       |       |       |       |       |       |           |
|--------------|-------|-------|-------|-------|-------|-------|-------|-------|-------|-------|-------|-------|------|-------|-------|-------|-------|-------|-------|-------|-------|-----------|
| <b>RSAD2</b> | -0.19 | 0.27  | 0.14  | -0.11 | -0.17 | 0.16  | -0.06 | 0.13  | -0.20 | 0.20  | 0.16  | -0.05 | 0.01 | 0.13  | -0.01 | -0.13 | 0.14  | -0.15 | 1.00  | 0.15  | -0.10 | 213797_at |
| <b>CLIC2</b> | 0.23  | 0.49  | 0.37  | 0.02  | -0.22 | -0.17 | 0.00  | 0.05  | 0.10  | -0.08 | 0.59  | -0.17 | 0.07 | 0.66  | 0.41  | -0.07 | 0.48  | -0.19 | 0.15  | 1.00  | -0.18 | 213415_at |
| <b>TREM2</b> | -0.06 | -0.19 | -0.07 | 0.28  | 0.32  | -0.23 | 0.42  | -0.22 | -0.05 | -0.40 | -0.05 | 0.29  | 0.10 | -0.13 | -0.05 | 0.45  | -0.05 | 0.34  | -0.10 | -0.18 | 1.00  | 219725_at |

Table E7-10: Pairwise similarity across 134 subjects in validation cohort (DCs activated)

| Similarity matrix | LAMP3 | IDO1  | CXCL10 | BIRC3 | TNFAIP6 | RSAD2 | KYNU  | CCL17 | CD80  | CD86  | FPR3  | IFI44L | CXCL11 | MMP12 | CHST7 | CCL19 | AQP9  | RASSF4 | IL12B | CD1B  | NR4A3 | Probe #     |
|-------------------|-------|-------|--------|-------|---------|-------|-------|-------|-------|-------|-------|--------|--------|-------|-------|-------|-------|--------|-------|-------|-------|-------------|
| <b>LAMP3</b>      | 1.00  | 0.72  | -0.09  | -0.05 | 0.48    | 0.27  | 0.68  | -0.27 | -0.04 | 0.46  | -0.15 | 0.24   | -0.05  | -0.01 | 0.01  | -0.01 | -0.16 | 0.21   | -0.08 | -0.21 | 0.52  | 205569_at   |
| <b>IDO1</b>       | 0.72  | 1.00  | -0.10  | -0.07 | 0.35    | 0.14  | 0.46  | -0.11 | -0.06 | 0.42  | -0.10 | 0.08   | 0.08   | 0.03  | -0.05 | 0.13  | -0.06 | 0.14   | -0.14 | -0.19 | 0.32  | 210029_at   |
| <b>CXCL10</b>     | -0.09 | -0.10 | 1.00   | -0.17 | 0.07    | -0.20 | 0.13  | -0.01 | -0.20 | 0.12  | 0.09  | -0.15  | 0.31   | 0.00  | 0.06  | -0.01 | -0.03 | 0.15   | 0.01  | -0.03 | 0.16  | 204533_at   |
| <b>BIRC3</b>      | -0.05 | -0.07 | -0.17  | 1.00  | -0.11   | 0.20  | -0.28 | -0.15 | -0.12 | -0.22 | -0.35 | 0.17   | 0.05   | -0.18 | -0.18 | -0.22 | -0.16 | -0.28  | 0.00  | -0.04 | -0.14 | 210538_s_at |
| <b>TNFAIP6</b>    | 0.48  | 0.35  | 0.07   | -0.11 | 1.00    | 0.14  | 0.68  | -0.08 | 0.12  | 0.28  | -0.13 | 0.07   | -0.05  | -0.10 | 0.45  | 0.06  | -0.04 | 0.29   | 0.02  | -0.15 | 0.49  | 206025_s_at |
| <b>RSAD2</b>      | 0.27  | 0.14  | -0.20  | 0.20  | 0.14    | 1.00  | 0.13  | -0.15 | -0.01 | -0.09 | 0.01  | 0.79   | -0.06  | -0.11 | 0.05  | -0.15 | -0.16 | 0.17   | -0.05 | -0.17 | -0.13 | 213797_at   |
| <b>KYNU</b>       | 0.68  | 0.46  | 0.13   | -0.28 | 0.68    | 0.13  | 1.00  | -0.19 | 0.01  | 0.69  | 0.20  | -0.05  | -0.10  | -0.04 | 0.42  | -0.05 | -0.09 | 0.51   | -0.04 | -0.20 | 0.63  | 217388_s_at |
| <b>CCL17</b>      | -0.27 | -0.11 | -0.01  | -0.15 | -0.08   | -0.15 | -0.19 | 1.00  | 0.14  | -0.25 | 0.03  | -0.07  | -0.06  | 0.17  | -0.23 | 0.20  | 0.29  | -0.03  | 0.11  | 0.19  | -0.18 | 207900_at   |
| <b>CD80</b>       | -0.04 | -0.06 | -0.20  | -0.12 | 0.12    | -0.01 | 0.01  | 0.14  | 1.00  | -0.03 | 0.04  | -0.07  | -0.08  | 0.25  | 0.23  | 0.28  | 0.33  | 0.02   | 0.15  | 0.12  | 0.04  | 207176_s_at |
| <b>CD86</b>       | 0.46  | 0.42  | 0.12   | -0.22 | 0.28    | -0.09 | 0.69  | -0.25 | -0.03 | 1.00  | 0.26  | -0.24  | -0.07  | 0.06  | 0.39  | -0.08 | -0.02 | 0.36   | -0.11 | -0.18 | 0.52  | 210895_s_at |
| <b>FPR3</b>       | -0.15 | -0.10 | 0.09   | -0.35 | -0.13   | 0.01  | 0.20  | 0.03  | 0.04  | 0.26  | 1.00  | -0.11  | -0.01  | 0.18  | 0.17  | -0.06 | 0.00  | 0.32   | -0.06 | -0.06 | 0.01  | 214560_at   |

|               |       |       |       |       |       |       |       |       |       |       |       |       |       |       |       |       |       |       |       |       |       |             |
|---------------|-------|-------|-------|-------|-------|-------|-------|-------|-------|-------|-------|-------|-------|-------|-------|-------|-------|-------|-------|-------|-------|-------------|
| <b>IFI44L</b> | 0.24  | 0.08  | -0.15 | 0.17  | 0.07  | 0.79  | -0.05 | -0.07 | -0.07 | -0.24 | -0.11 | 1.00  | -0.02 | -0.05 | -0.23 | -0.08 | -0.13 | 0.05  | 0.07  | -0.08 | -0.20 | 204439_at   |
| <b>CXCL11</b> | -0.05 | 0.08  | 0.31  | 0.05  | -0.05 | -0.06 | -0.10 | -0.06 | -0.08 | -0.07 | -0.01 | -0.02 | 1.00  | 0.02  | -0.05 | 0.08  | -0.01 | -0.13 | -0.01 | 0.03  | -0.05 | 211122_s_at |
| <b>MMP12</b>  | -0.01 | 0.03  | 0.00  | -0.18 | -0.10 | -0.11 | -0.04 | 0.17  | 0.25  | 0.06  | 0.18  | -0.05 | 0.02  | 1.00  | -0.03 | 0.21  | 0.25  | 0.03  | 0.13  | 0.18  | -0.06 | 204580_at   |
| <b>CHST7</b>  | 0.01  | -0.05 | 0.06  | -0.18 | 0.45  | 0.05  | 0.42  | -0.23 | 0.23  | 0.39  | 0.17  | -0.23 | -0.05 | -0.03 | 1.00  | -0.14 | -0.10 | 0.21  | -0.06 | -0.19 | 0.35  | 206756_at   |
| <b>CCL19</b>  | -0.01 | 0.13  | -0.01 | -0.22 | 0.06  | -0.15 | -0.05 | 0.20  | 0.28  | -0.08 | -0.06 | -0.08 | 0.08  | 0.21  | -0.14 | 1.00  | 0.37  | 0.05  | 0.08  | 0.18  | -0.03 | 210072_at   |
| <b>AQP9</b>   | -0.16 | -0.06 | -0.03 | -0.16 | -0.04 | -0.16 | -0.09 | 0.29  | 0.33  | -0.02 | 0.00  | -0.13 | -0.01 | 0.25  | -0.10 | 0.37  | 1.00  | -0.05 | 0.19  | 0.27  | -0.09 | 1556459_at  |
| <b>RASSF4</b> | 0.21  | 0.14  | 0.15  | -0.28 | 0.29  | 0.17  | 0.51  | -0.03 | 0.02  | 0.36  | 0.32  | 0.05  | -0.13 | 0.03  | 0.21  | 0.05  | -0.05 | 1.00  | -0.05 | -0.17 | 0.30  | 49306_at    |
| <b>IL12B</b>  | -0.08 | -0.14 | 0.01  | 0.00  | 0.02  | -0.05 | -0.04 | 0.11  | 0.15  | -0.11 | -0.06 | 0.07  | -0.01 | 0.13  | -0.06 | 0.08  | 0.19  | -0.05 | 1.00  | 0.18  | 0.03  | 207901_at   |
| <b>CD1B</b>   | -0.21 | -0.19 | -0.03 | -0.04 | -0.15 | -0.17 | -0.20 | 0.19  | 0.12  | -0.18 | -0.06 | -0.08 | 0.03  | 0.18  | -0.19 | 0.18  | 0.27  | -0.17 | 0.18  | 1.00  | -0.18 | 206749_at   |
| <b>NR4A3</b>  | 0.52  | 0.32  | 0.16  | -0.14 | 0.49  | -0.13 | 0.63  | -0.18 | 0.04  | 0.52  | 0.01  | -0.20 | -0.05 | -0.06 | 0.35  | -0.03 | -0.09 | 0.30  | 0.03  | -0.18 | 1.00  | 209959_at   |

Table E7-11: Pairwise similarity across 134 subjects in validation cohort (NK cells)

| Similarity matrix | CCL4  | IL2RB | APOB EC3A | IL18R AP | TBX21 | CCND 2 | KIR2D S1 | FASLG | TXK   | TTC38 | CD244 | DEFA4 | CD160 | PLEKH F1 | KIR2D L2 | PRR5L | IL12R B2 | IL18R1 | CAMP  | KIR3D L1 | CEACA M8 | Probe #     |
|-------------------|-------|-------|-----------|----------|-------|--------|----------|-------|-------|-------|-------|-------|-------|----------|----------|-------|----------|--------|-------|----------|----------|-------------|
| <b>CCL4</b>       | 1.00  | -0.16 | -0.05     | -0.13    | -0.19 | -0.15  | 0.01     | -0.32 | -0.08 | 0.07  | -0.19 | -0.09 | -0.19 | -0.32    | 0.00     | -0.21 | 0.08     | -0.12  | -0.07 | 0.05     | 0.07     | 204103_at   |
| <b>IL2RB</b>      | -0.16 | 1.00  | -0.09     | 0.35     | 0.47  | 0.61   | -0.10    | 0.54  | 0.24  | 0.07  | 0.44  | -0.05 | 0.16  | 0.29     | -0.42    | 0.68  | 0.30     | 0.27   | -0.25 | -0.16    | -0.25    | 205291_at   |
| <b>APOBEC3A</b>   | -0.05 | -0.09 | 1.00      | -0.01    | 0.01  | -0.11  | 0.10     | -0.05 | 0.01  | 0.14  | -0.03 | -0.03 | -0.03 | -0.07    | 0.01     | -0.02 | -0.03    | -0.04  | -0.01 | 0.01     | -0.04    | 210873_x_at |
| <b>IL18RAP</b>    | -0.13 | 0.35  | -0.01     | 1.00     | 0.57  | 0.14   | 0.10     | 0.51  | 0.19  | 0.17  | 0.32  | -0.18 | 0.05  | 0.22     | -0.01    | 0.63  | -0.12    | 0.56   | -0.35 | -0.01    | 0.04     | 207072_at   |

|                |       |       |       |       |       |       |       |       |       |       |       |       |       |       |       |       |       |       |       |       |       |             |
|----------------|-------|-------|-------|-------|-------|-------|-------|-------|-------|-------|-------|-------|-------|-------|-------|-------|-------|-------|-------|-------|-------|-------------|
| <b>TBX21</b>   | -0.19 | 0.47  | 0.01  | 0.57  | 1.00  | 0.35  | -0.07 | 0.44  | 0.08  | 0.08  | 0.35  | -0.16 | 0.30  | 0.33  | -0.25 | 0.53  | -0.01 | 0.40  | -0.37 | -0.12 | -0.13 | 220684_at   |
| <b>CCND2</b>   | -0.15 | 0.61  | -0.11 | 0.14  | 0.35  | 1.00  | -0.26 | 0.35  | 0.19  | -0.08 | 0.26  | -0.04 | 0.18  | 0.34  | -0.57 | 0.37  | 0.23  | 0.35  | -0.20 | -0.22 | -0.18 | 200953_s_at |
| <b>KIR2DS1</b> | 0.01  | -0.10 | 0.10  | 0.10  | -0.07 | -0.26 | 1.00  | 0.07  | -0.10 | 0.08  | 0.01  | 0.15  | -0.07 | -0.04 | 0.42  | -0.06 | 0.03  | -0.14 | 0.09  | 0.35  | -0.02 | 211532_x_at |
| <b>FASLG</b>   | -0.32 | 0.54  | -0.05 | 0.51  | 0.44  | 0.35  | 0.07  | 1.00  | 0.17  | 0.02  | 0.35  | 0.17  | 0.12  | 0.16  | -0.08 | 0.59  | 0.13  | 0.33  | -0.03 | 0.03  | -0.17 | 210865_at   |
| <b>TXK</b>     | -0.08 | 0.24  | 0.01  | 0.19  | 0.08  | 0.19  | -0.10 | 0.17  | 1.00  | 0.04  | -0.10 | -0.12 | 0.07  | 0.01  | -0.22 | 0.33  | 0.08  | 0.45  | -0.23 | -0.21 | -0.15 | 206828_at   |
| <b>TTC38</b>   | 0.07  | 0.07  | 0.14  | 0.17  | 0.08  | -0.08 | 0.08  | 0.02  | 0.04  | 1.00  | 0.08  | -0.14 | -0.03 | 0.20  | -0.01 | 0.02  | 0.06  | -0.02 | -0.07 | -0.12 | 0.09  | 218272_at   |
| <b>CD244</b>   | -0.19 | 0.44  | -0.03 | 0.32  | 0.35  | 0.26  | 0.01  | 0.35  | -0.10 | 0.08  | 1.00  | -0.06 | 0.07  | 0.25  | -0.22 | 0.31  | 0.08  | 0.10  | -0.08 | 0.13  | 0.05  | 220307_at   |
| <b>DEFA4</b>   | -0.09 | -0.05 | -0.03 | -0.18 | -0.16 | -0.04 | 0.15  | 0.17  | -0.12 | -0.14 | -0.06 | 1.00  | -0.12 | -0.20 | 0.16  | -0.15 | -0.10 | -0.22 | 0.30  | 0.18  | 0.00  | 207269_at   |
| <b>CD160</b>   | -0.19 | 0.16  | -0.03 | 0.05  | 0.30  | 0.18  | -0.07 | 0.12  | 0.07  | -0.03 | 0.07  | -0.12 | 1.00  | 0.36  | -0.19 | 0.13  | 0.06  | -0.01 | 0.01  | -0.13 | -0.12 | 207840_at   |
| <b>PLEKHF1</b> | -0.32 | 0.29  | -0.07 | 0.22  | 0.33  | 0.34  | -0.04 | 0.16  | 0.01  | 0.20  | 0.25  | -0.20 | 0.36  | 1.00  | -0.24 | 0.26  | 0.11  | 0.16  | -0.13 | -0.06 | -0.16 | 219566_at   |
| <b>KIR2DL2</b> | 0.00  | -0.42 | 0.01  | -0.01 | -0.25 | -0.57 | 0.42  | -0.08 | -0.22 | -0.01 | -0.22 | 0.16  | -0.19 | -0.24 | 1.00  | -0.20 | -0.20 | -0.20 | 0.23  | 0.35  | 0.12  | 208426_x_at |
| <b>PRR5L</b>   | -0.21 | 0.68  | -0.02 | 0.63  | 0.53  | 0.37  | -0.06 | 0.59  | 0.33  | 0.02  | 0.31  | -0.15 | 0.13  | 0.26  | -0.20 | 1.00  | 0.13  | 0.46  | -0.34 | -0.18 | -0.20 | 219383_at   |
| <b>IL12RB2</b> | 0.08  | 0.30  | -0.03 | -0.12 | -0.01 | 0.23  | 0.03  | 0.13  | 0.08  | 0.06  | 0.08  | -0.10 | 0.06  | 0.11  | -0.20 | 0.13  | 1.00  | -0.09 | -0.06 | -0.14 | -0.19 | 206999_at   |
| <b>IL18R1</b>  | -0.12 | 0.27  | -0.04 | 0.56  | 0.40  | 0.35  | -0.14 | 0.33  | 0.45  | -0.02 | 0.10  | -0.22 | -0.01 | 0.16  | -0.20 | 0.46  | -0.09 | 1.00  | -0.38 | -0.14 | -0.02 | 206618_at   |
| <b>CAMP</b>    | -0.07 | -0.25 | -0.01 | -0.35 | -0.37 | -0.20 | 0.09  | -0.03 | -0.23 | -0.07 | -0.08 | 0.30  | 0.01  | -0.13 | 0.23  | -0.34 | -0.06 | -0.38 | 1.00  | 0.30  | 0.01  | 210244_at   |
| <b>KIR3DL1</b> | 0.05  | -0.16 | 0.01  | -0.01 | -0.12 | -0.22 | 0.35  | 0.03  | -0.21 | -0.12 | 0.13  | 0.18  | -0.13 | -0.06 | 0.35  | -0.18 | -0.14 | -0.14 | 0.30  | 1.00  | 0.11  | 216907_x_at |



CEACAM8 0.07 -0.25 -0.04 0.04 -0.13 -0.18 -0.02 -0.17 -0.15 0.09 0.05 0.00 -0.12 -0.16 0.12 -0.20 -0.19 -0.02 0.01 0.11 1.00 20667  
6\_at

Table E8

| # | Cell subset | Cell types included          | Markers used                                                   | Cell Separation Method                                                                                                                                                                                                 | Original reference (PMID) |
|---|-------------|------------------------------|----------------------------------------------------------------|------------------------------------------------------------------------------------------------------------------------------------------------------------------------------------------------------------------------|---------------------------|
| 1 | T cells     | CD8 T cells                  | see below                                                      | see below                                                                                                                                                                                                              | 15789058                  |
|   |             | CD4 T cells                  | see below                                                      | see below                                                                                                                                                                                                              | 16791882 and 15789058     |
| 2 | CD8 T cells |                              | CD3, CD8, CD45RA                                               | RosetteSep™ CD8+ T-cell enrichment cocktail, CD-8 subset                                                                                                                                                               | 15789058                  |
| 3 | CD4 T cells | T cells CD4 naive            | CD4+                                                           | Ficoll, then MACS CD4+ T cell isolation kit                                                                                                                                                                            | 16791882                  |
|   |             | T cells CD4 memory resting   | CD45ROhigh                                                     | Ficoll, then FACS                                                                                                                                                                                                      | 15789058                  |
|   |             | T cells CD4 memory activated | CD45ROhigh; CD69, CD25 for activation                          | Ficoll, then FACS, then activated by anti-CD3 (plate-bound) + anti-CD28 (soluble)                                                                                                                                      | 15789058                  |
| 4 | Monocytes   |                              | N/A                                                            | MACS® CD14 Microbeads, monocyte subset                                                                                                                                                                                 | 15789058                  |
| 5 | Macrophages | Macrophages M0               | None known; identified by morphology and phagocytic capability | Differentiated from monocytes                                                                                                                                                                                          | 15789058                  |
|   |             | Macrophages M1               | None known; identified by morphology and phagocytic capability | Histopaque 1.077, then Miltenyi negative selection monocyte isolation kit and LS columns, then differentiated with 1% medium supplement nutridoma-HU + 100 nM M-CSF, then activated with 20 ng/ml IFN-g+ 100 ng/ml LPS | 17244792                  |

|    |          |                           |                                                                |                                                                                                                                                                                                                                               |          |
|----|----------|---------------------------|----------------------------------------------------------------|-----------------------------------------------------------------------------------------------------------------------------------------------------------------------------------------------------------------------------------------------|----------|
|    |          | Macrophages M2            | None known; identified by morphology and phagocytic capability | Histopaque 1.077, then Miltenyi negative selection monocyte isolation kit and LS columns, then differentiated with 1% medium supplement nutridoma-HU + 100 nM M-CSF, then activated with 20 ng/ml IFN-gamma + 100 ng/ml LPS and 20 ng/ml IL-4 | 17244792 |
| 6  |          | Macrophages (M2)          | None known; identified by morphology and phagocytic capability | Histopaque 1.077, then Miltenyi negative selection monocyte isolation kit and LS columns, then differentiated with 1% medium supplement nutridoma-HU + 100 nM M-CSF, then activated with 20 ng/ml IFN-gamma + 100 ng/ml LPS and 20 ng/ml IL-4 | 17244792 |
| 7  | B cells  | B cells naive             | CD19+CD27-IgG/A-                                               | MACS® CD138 microbeads and CD19 microbeads                                                                                                                                                                                                    | 15789058 |
|    |          | B cells memory            | CD19+ CD27+                                                    | MACS® CD138 microbeads and CD19 microbeads, then FACS                                                                                                                                                                                         | 15789058 |
| 8  | DCs      | Dendritic cells resting   | N/A                                                            | Monocytes differentiated with 17 ng/ml IL4, and 67 ng/ml GM-CSF                                                                                                                                                                               | 15789058 |
|    |          | Dendritic cells activated | N/A                                                            | Monocytes differentiated with 17 ng/ml IL4, and 67 ng/ml GM-CSF, then stimulated with 1 ug/ml LPS                                                                                                                                             | 15789058 |
| 9  |          | DCs (activated)           | N/A                                                            | Monocytes differentiated with 17 ng/ml IL4, and 67 ng/ml GM-CSF, then stimulated with 1 ug/ml LPS                                                                                                                                             | 15789058 |
| 10 | NK cells | NK cells resting          | CD56                                                           | RosetteSep™ NK-cell enrichment cocktail + CD2 Microbeads                                                                                                                                                                                      | 15789058 |
|    |          | NK cells activated        | CD56 + CD69                                                    | RosetteSep™ NK-cell enrichment cocktail + CD2 Microbeads + IL2 or IL15 for activation                                                                                                                                                         | 15789058 |

Table E9

| Name                        | miRNA ID     | p value | Fold change  |
|-----------------------------|--------------|---------|--------------|
| hsa-miR-152-3p              | MIMAT0000438 | 0.003   | 1.772727273  |
| hsa-miR-1260a               | MIMAT0005911 | 0.003   | 1.567164179  |
| hsa-miR-423-5p              | MIMAT0004748 | 0.005   | 1.398843931  |
| hsa-miR-30c-5p              | MIMAT0000244 | 0.007   | 1.464285714  |
| hsa-miR-185-5p              | MIMAT0000455 | 0.007   | 1.452941176  |
| hsa-miR-499b-3p             | MIMAT0019898 | 0.007   | -1.661016949 |
| hsa-miR-133b                | MIMAT0000770 | 0.007   | -1.916666667 |
| hsa-miR-34a-5p              | MIMAT0000255 | 0.01    | 1.5          |
| hsa-miR-194-5p              | MIMAT0000460 | 0.01    | -1.419642857 |
| hsa-miR-376c-5p             | MIMAT0022861 | 0.013   | 1.818181818  |
| hsa-miR-26a-5p              | MIMAT0000082 | 0.013   | 1.769063181  |
| hsa-miR-454-3p              | MIMAT0003885 | 0.013   | 1.661016949  |
| hsa-miR-1973                | MIMAT0009448 | 0.013   | 1.285714286  |
| hsa-miR-612                 | MIMAT0003280 | 0.013   | -1.396825397 |
| hsa-miR-487b-3p             | MIMAT0003180 | 0.018   | 1.923076923  |
| hsa-miR-4458                | MIMAT0018980 | 0.018   | 1.515151515  |
| hsa-miR-423-3p              | MIMAT0001340 | 0.018   | 1.397790055  |
| hsa-miR-125b-5p             | MIMAT0000423 | 0.018   | 1.393081761  |
| hsa-miR-16-5p               | MIMAT0000069 | 0.024   | 2.127266839  |
| hsa-miR-146b-5p             | MIMAT0002809 | 0.024   | 1.829411765  |
| hsa-miR-92a-3p              | MIMAT0000092 | 0.024   | 1.646938776  |
| hsa-miR-574-3p              | MIMAT0003239 | 0.024   | 1.5375       |
| hsa-miR-654-3p              | MIMAT0004814 | 0.024   | 1.526315789  |
| hsa-miR-155-5p              | MIMAT0000646 | 0.024   | 1.473523422  |
| hsa-miR-4443                | MIMAT0018961 | 0.024   | 1.369888476  |
| hsa-miR-140-3p              | MIMAT0004597 | 0.024   | 1.326666667  |
| hsa-miR-3065-3p             | MIMAT0015378 | 0.024   | 1.302631579  |
| hsa-miR-331-3p              | MIMAT0000760 | 0.024   | 1.3          |
| hsa-miR-548c-5p+hsa-miR-54f | MIMAT0004806 | 0.024   | -1.362637363 |
| hsa-let-7f-5p               | MIMAT0000067 | 0.032   | 1.895631068  |
| hsa-miR-31-5p               | MIMAT0000089 | 0.032   | 1.388888889  |
| hsa-miR-613                 | MIMAT0003281 | 0.032   | 1.373015873  |
| hsa-miR-544a                | MIMAT0003164 | 0.032   | -1.173553719 |
| hsa-miR-296-3p              | MIMAT0004679 | 0.032   | -1.418803419 |
| hsa-miR-548o-3p+hsa-miR-54f | MIMAT0005919 | 0.032   | -1.459459459 |
| hsa-miR-330-5p              | MIMAT0004693 | 0.032   | -1.5         |
| hsa-miR-302b-3p             | MIMAT0000715 | 0.032   | -1.904761905 |
| hsa-miR-499a-5p             | MIMAT0002870 | 0.041   | 1.65503876   |
| hsa-miR-29a-3p              | MIMAT0000086 | 0.041   | 1.571017274  |
| hsa-miR-146a-5p             | MIMAT0000449 | 0.041   | 1.563071298  |
| hsa-miR-1262                | MIMAT0005914 | 0.041   | 1.322222222  |
| hsa-miR-509-3-5p            | MIMAT0004975 | 0.041   | -1.319148936 |
| hsa-miR-517b-3p             | MIMAT0002857 | 0.041   | -1.372093023 |
| hsa-miR-525-3p              | MIMAT0002839 | 0.041   | -3.25        |
